# Supplementary material
Source: publisher figshare collection journal article supplement (https://acs.figshare.com/ndownloader/files/5219101)
Supplement: Supplementary file 1 [file 5219101]

# Supporting Information

## Synthesis of Well-Defined Tower-Shaped 1,3,5-Trisubstituted Adamantanes Incorporating a Macrocyclic Trilactam Ring System

*Quan Li, Changshu Jin, Pavel A. Petukhov, Aleksey V. Rukavishnikov, Tatiana O. Zaikova, Avinash Phadke, Donald H. LaMunyon, Melissa D. Lee and John F. W. Keana\**

Department of Chemistry, University of Oregon, Eugene, Oregon 97403-1253

### Table of Contents

#### General Experimental: S-2

#### Spectral and analytical data for:

|           |     |  |           |     |  |           |     |  |           |     |
|-----------|-----|--|-----------|-----|--|-----------|-----|--|-----------|-----|
| <b>8</b>  | S-2 |  | <b>13</b> | S-3 |  | <b>17</b> | S-3 |  | <b>28</b> | S-3 |
| <b>11</b> | S-2 |  | <b>16</b> | S-3 |  | <b>27</b> | S-3 |  |           |     |

#### <sup>1</sup>H NMR (300 MHz) spectra for:

|           |     |  |           |      |  |           |      |  |           |      |  |           |      |  |           |      |
|-----------|-----|--|-----------|------|--|-----------|------|--|-----------|------|--|-----------|------|--|-----------|------|
| <b>8</b>  | S-4 |  | <b>13</b> | S-9  |  | <b>18</b> | S-14 |  | <b>22</b> | S-26 |  | <b>27</b> | S-39 |  | <b>32</b> | S-48 |
| <b>10</b> | S-5 |  | <b>15</b> | S-10 |  | <b>19</b> | S-15 |  | <b>23</b> | S-23 |  | <b>28</b> | S-40 |  | <b>33</b> | S-49 |
| <b>11</b> | S-6 |  | <b>16</b> | S-12 |  | <b>20</b> | S-17 |  | <b>24</b> | S-28 |  | <b>29</b> | S-41 |  |           |      |
| <b>12</b> | S-7 |  | <b>17</b> | S-13 |  | <b>21</b> | S-20 |  | <b>25</b> | S-32 |  | <b>31</b> | S-46 |  |           |      |

#### <sup>1</sup>H NMR (500 MHz) spectra for:

|           |      |  |           |      |
|-----------|------|--|-----------|------|
| <b>26</b> | S-34 |  | <b>30</b> | S-42 |
|-----------|------|--|-----------|------|

#### <sup>13</sup>C NMR (75 MHz) spectra for:

|           |     |  |           |      |  |           |      |  |           |      |  |           |      |
|-----------|-----|--|-----------|------|--|-----------|------|--|-----------|------|--|-----------|------|
| <b>8</b>  | S-5 |  | <b>13</b> | S-10 |  | <b>18</b> | S-14 |  | <b>23</b> | S-25 |  | <b>28</b> | S-40 |
| <b>10</b> | S-6 |  | <b>15</b> | S-11 |  | <b>19</b> | S-16 |  | <b>24</b> | S-30 |  | <b>29</b> | S-42 |
| <b>11</b> | S-7 |  | <b>16</b> | S-12 |  | <b>20</b> | S-19 |  | <b>26</b> | S-36 |  | <b>31</b> | S-47 |
| <b>12</b> | S-8 |  | <b>17</b> | S-13 |  | <b>21</b> | S-22 |  | <b>27</b> | S-39 |  | <b>32</b> | S-49 |

#### <sup>13</sup>C NMR (125 MHz) spectra for:

|           |      |  |           |      |  |           |      |
|-----------|------|--|-----------|------|--|-----------|------|
| <b>25</b> | S-32 |  | <b>26</b> | S-35 |  | <b>30</b> | S-43 |
|-----------|------|--|-----------|------|--|-----------|------|

#### 2D NMR (500 MHz) for:

|           |      |  |           |      |
|-----------|------|--|-----------|------|
| <b>26</b> | S-38 |  | <b>30</b> | S-45 |
|-----------|------|--|-----------|------|

#### FAB MS for:

|           |      |  |           |      |  |           |      |
|-----------|------|--|-----------|------|--|-----------|------|
| <b>22</b> | S-28 |  | <b>26</b> | S-38 |  | <b>30</b> | S-46 |
|-----------|------|--|-----------|------|--|-----------|------|

**General Information.** All reagents were purchased from commercial suppliers and used without further purification unless otherwise stated. Tetrahydrofuran (99.9%, anhydrous, inhibitor free), triethylamine (99.5%) and chlorobenzene (99.8%, anhydrous) were used as received. Solvents were well deoxygenated with N<sub>2</sub> before use in Sonogashira coupling reactions or macrocyclization reactions. Brine refers to a saturated aqueous solution of NaCl. Melting points are uncorrected. A decomposition point is indicated by dec. PHB means that the sample was placed in a preheated block just below the decomposition temperature. <sup>1</sup>H and <sup>13</sup>C NMR spectra were recorded at 300 and 75 MHz, respectively, in CDCl<sub>3</sub> unless otherwise noted (e.g. 500 and 125 MHz). Chemical shifts are in δ units (ppm) with the residual solvent peak (<sup>1</sup>H CHCl<sub>3</sub>, δ 7.26; <sup>13</sup>C CDCl<sub>3</sub>, δ 77) as the internal standard. Coupling constants (*J*) are reported in hertz (Hz). NMR splitting patterns are designated as s, singlet; d, doublet; t, triplet; q, quartet; m, multiplet; and br, broad. Column chromatography was carried out on silica gel (60–200 mesh). Analytical TLC was performed on commercially coated 60 mesh F<sub>254</sub> plastic plates. Spots were rendered visible by exposing the plate to UV light. Radial chromatography (RC) was performed using 1, 2 and 4 mm disks covered with silica gel 60PF<sub>254</sub> containing gypsum. Fluorescence spectra were acquired at 25 °C on a fluorescence spectrometer with 5 nm and 10 nm excitation and emission slit widths, respectively, using a 10 mm path quartz cuvette. Mass spectra other than FAB mass spectra were measured by LC-MS.

**1,3,5-Triethynyladamantane (8).** Colorless crystals, mp 84–86 °C (Lit.<sup>1</sup> 84–86 °C); <sup>1</sup>H NMR δ 1.78 (d, *J* = 3.0 Hz, 6H), 1.95 (s, 6H), 2.11 (t, *J* = 3.3 Hz, 1H), 2.14 (s, 3H); <sup>13</sup>C NMR δ 27.79, 29.76, 40.39, 46.15, 68.15, 90.02; MS calcd for C<sub>16</sub>H<sub>15</sub> (M-1) 207.1, found 207.1. Anal. Calcd for C<sub>16</sub>H<sub>16</sub>: C, 92.26; H, 7.74. Found: C, 92.11; H, 7.77.

**Pyrrolidin-1-yl-(4-trimethylsilanylethynylphenyl)diazene (11).** Light yellow crystals, which were pure by TLC and NMR: mp 110–112 °C (lit.<sup>2</sup> mp 101 °C); <sup>1</sup>H NMR δ 0.24 (s, 9H), 2.02 (t, *J* = 6.3 Hz, 4H), 3.79 (brs, 4H), 7.34 (d, *J* = 8.9 Hz, 2H), 7.42 (d, *J* = 8.9 Hz, 2H); <sup>13</sup>C NMR δ 0.04, 23.75, 93.57,

105.71, 119.28, 120.12, 132.73, 151.32; MS calcd for  $C_{15}H_{21}N_3Si$  (M) 271.1, found 271.0. Anal. Calcd for  $C_{15}H_{21}N_3Si \cdot 1/4H_2O$ : C, 65.29; H, 7.79; N, 15.23. Found: C, 65.49; H, 7.95; N, 15.31.

**(4-Iodophenylethynyl)trimethylsilane (13).** Colorless crystals, which were pure by TLC and NMR: mp 68-70 °C (lit.<sup>3</sup> mp 56-58 °C);  $^1H$  NMR  $\delta$  0.24 (s, 9H), 7.18 (d,  $J$  = 8.7 Hz, 2H), 7.63 (d,  $J$  = 8.7 Hz, 2H);  $^{13}C$  NMR  $\delta$  -0.15, 94.46, 95.86, 103.95, 122.59, 133.41, 137.34; MS calcd for  $C_{11}H_{12}ISi$  (M-1) 299.0, found 299.0. Anal. Calcd for  $C_{11}H_{13}ISi$ : C, 44.01; H, 4.36. Found: C, 43.72; H, 4.16.

**Thioacetic Acid S-(4-Iodobenzyl) Ester (16).** Colorless solid,<sup>4</sup> which was pure by TLC and NMR: mp 41-42 °C (lit.<sup>5</sup> mp 40-41 °C);  $^1H$  NMR  $\delta$  2.34 (s, 3H), 4.04 (s, 2H), 7.04 (d,  $J$  = 8.4 Hz, 2H), 7.61 (d,  $J$  = 8.4 Hz, 2H);  $^{13}C$  NMR  $\delta$  30.30, 32.85, 92.65, 130.75, 137.44, 137.64, 194.82; MS calcd for  $C_9H_9IOSNa$  314.94, found 315.0.

**3,5-Bis(acetylsulfanylmethyl)iodobenzene (17).** Colorless solid,<sup>6</sup> which was pure by TLC and NMR: mp 39-41 °C (lit.<sup>6</sup> no mp);  $^1H$  NMR  $\delta$  2.35 (s, 6H), 4.00 (s, 4H), 7.15 (s, 1H), 7.50 (d,  $J$  = 1.5 Hz, 2H);  $^{13}C$  NMR  $\delta$  30.31, 32.39, 94.40, 128.65, 136.55, 140.17, 194.64.

**Thioacetic Acid S-(4-Trimethylsilanylethynylbenzyl) Ester (27).** A light yellow solid, which was pure by TLC and NMR: mp 41-42 °C (lit.<sup>5</sup> mp 41-42 °C);  $^1H$  NMR  $\delta$  0.27 (s, 9H), 2.37 (s, 3H), 4.12 (s, 2H), 7.24 (d,  $J$  = 8.4 Hz, 2H), 7.41 (d,  $J$  = 8.4 Hz, 2H);  $^{13}C$  NMR  $\delta$  -0.08, 30.27, 33.18, 94.38, 104.71, 122.05, 128.66, 132.13, 138.09, 194.83; MS calcd for  $C_{14}H_{19}OSSi$  (M+1) 263.1, found 263.1. Anal. Calcd for  $C_{14}H_{18}OSSi$ : C, 64.07; H, 6.91. Found: C, 63.94; H, 6.73.

**1-[4-(S-Acetylthiomethyl)phenyl]acetylene (28).** A yellow oil,<sup>5</sup> which was pure by TLC and NMR:  $^1H$  NMR  $\delta$  2.35 (s, 3H), 3.08 (s, 1H), 4.01 (s, 2H), 7.25 (d,  $J$  = 8.6 Hz, 2H), 7.42 (d,  $J$  = 8.6 Hz, 2H);  $^{13}C$  NMR  $\delta$  30.23, 33.09, 77.00, 83.26, 120.96, 128.74, 132.28, 138.49, 194.74; MS calcd for  $C_{11}H_9OS$  (M-1) 189.0, found 189.0. Anal. Calcd for  $C_{11}H_{10}OS$ : C, 69.44; H, 5.30. Found: C, 69.65; H, 5.31.

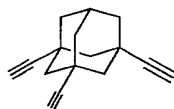

Compound 8

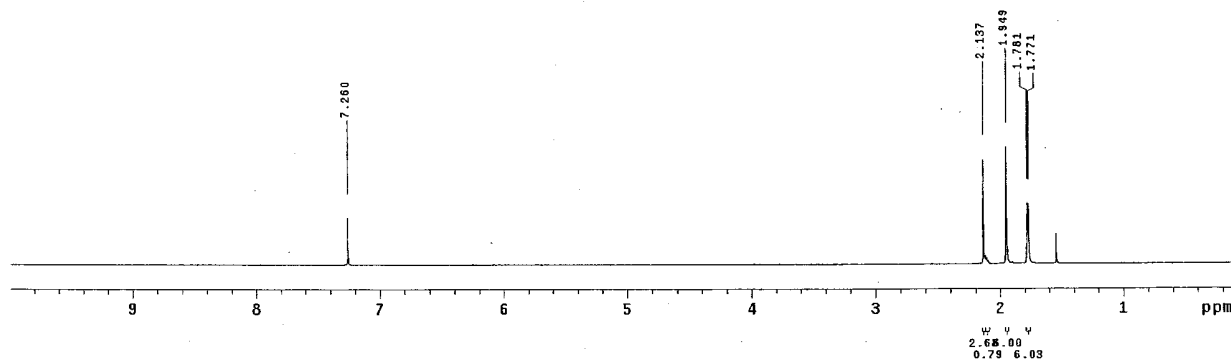

q11-256  
Pulse Sequence: s2pul

Compound 8

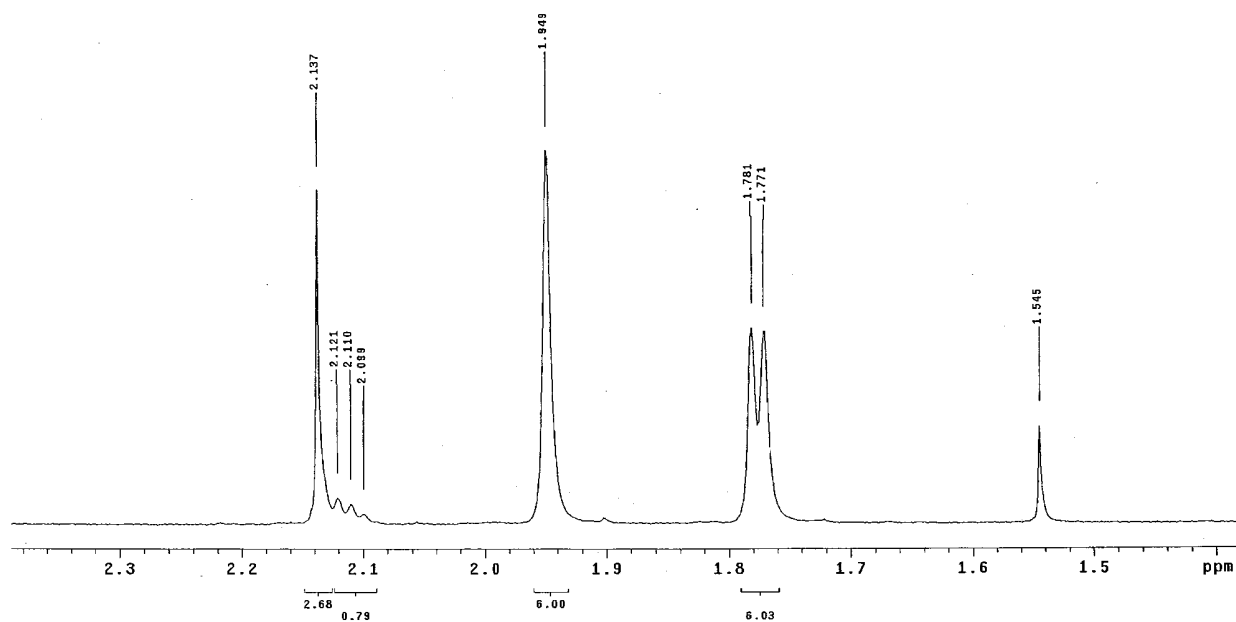

Compound 8

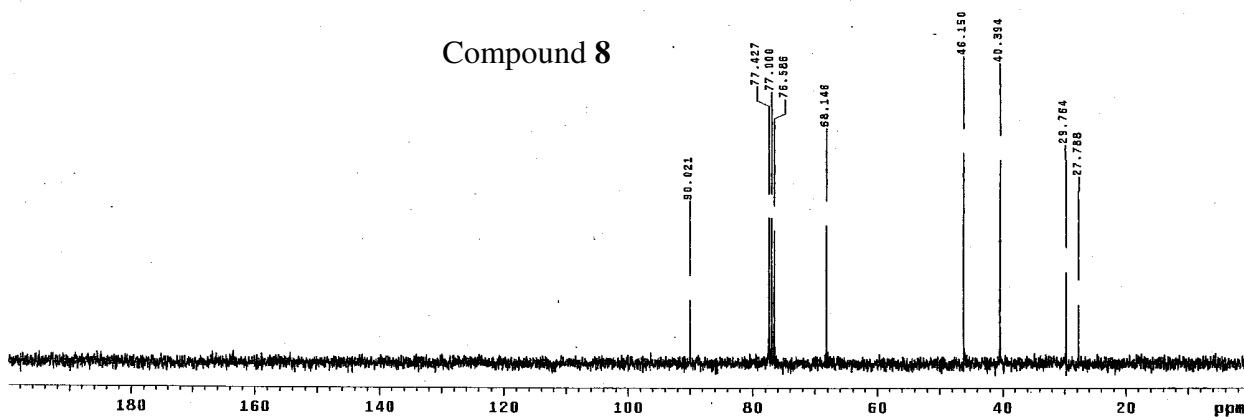

Changshu021004d  
Pulse Sequence: s2pu1

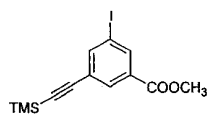

Compound 10

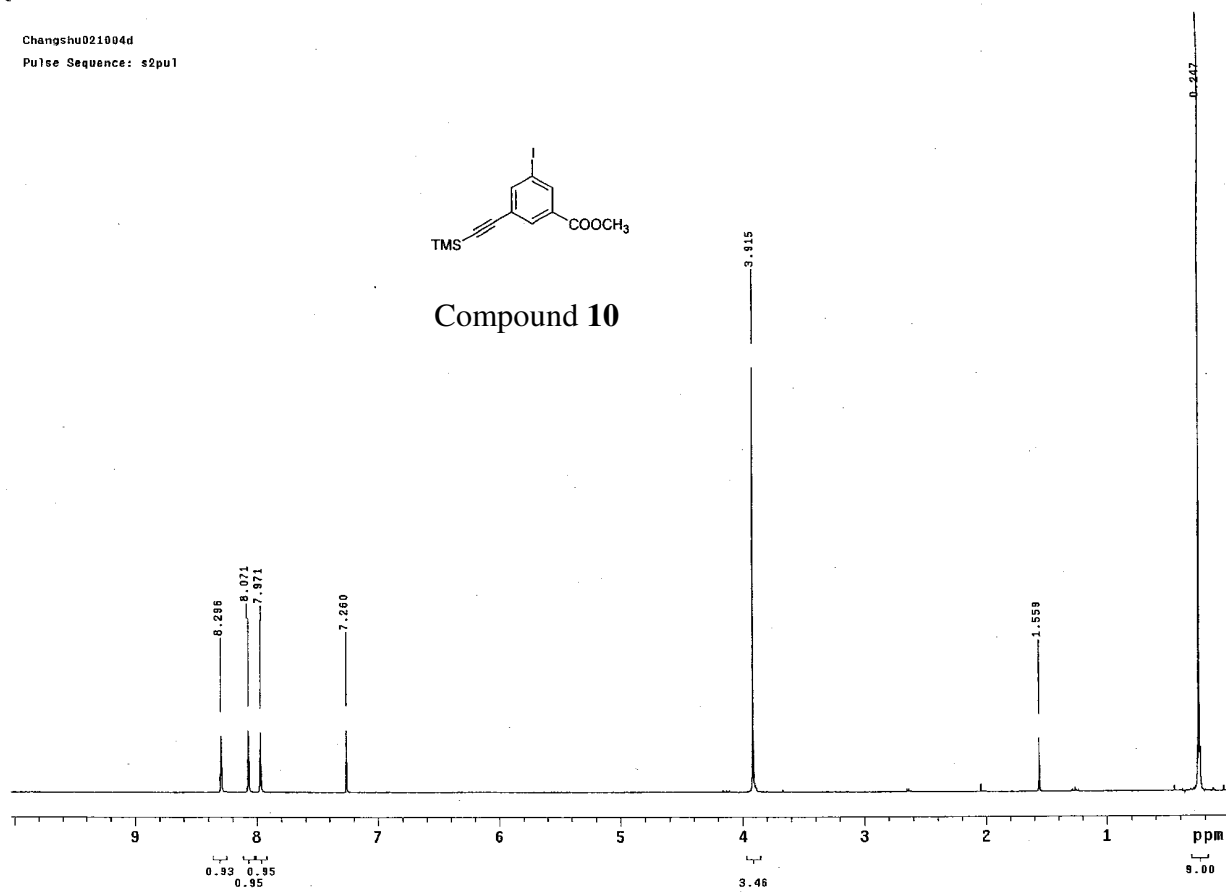

Compound 10

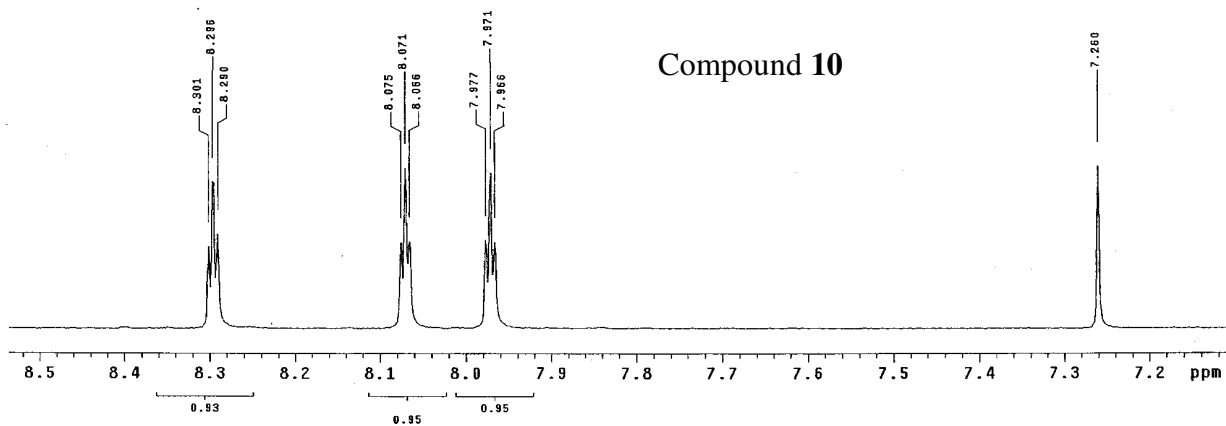

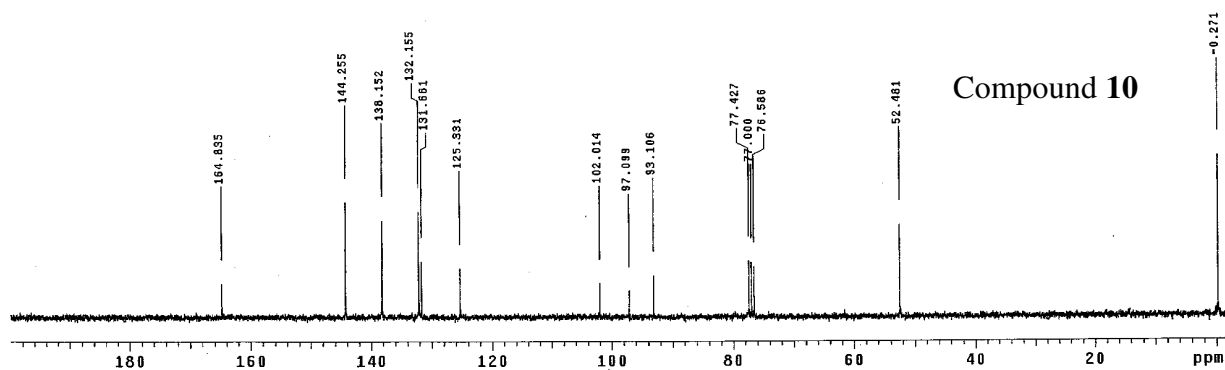

Pulse Sequence: s2pul

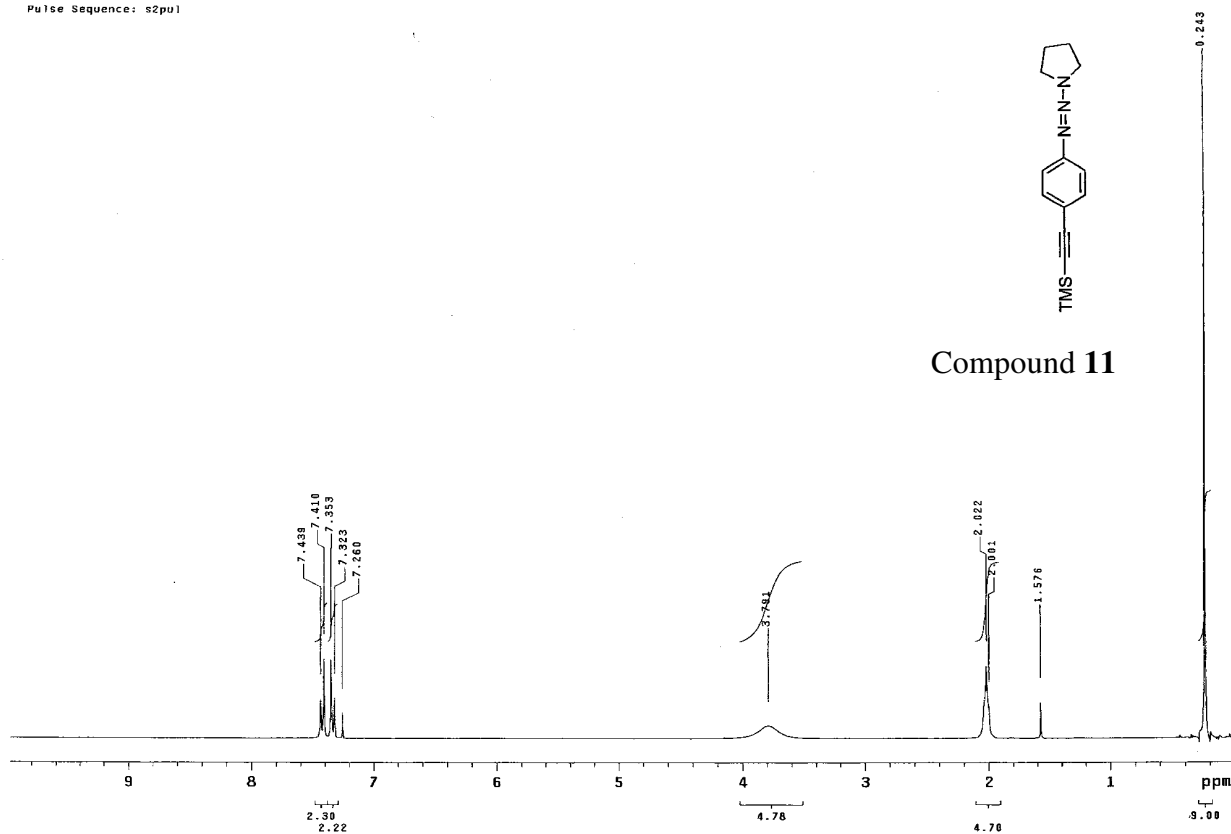

q11011126b  
Pulse Sequence: s2pul  
Solvent: CDCl3  
Ambient temperature  
INNOVA-300 "sunofmr"  
PULSE SEQUENCE  
Relax. delay 1.000 sec  
Pulse 42.6 degrees  
Acq. time 0.599 sec  
Width 16501.7 Hz  
250 repetitions  
OBSERVE C13, 75.4216991 MHz  
DECOUPLE H1, 299.9478514 MHz  
Power 32 dB  
continuously on  
WALTZ-16 modulated  
DATA PROCESSING  
Line broadening 1.0 Hz  
FT size 32768  
Total time 6 min, 42 sec

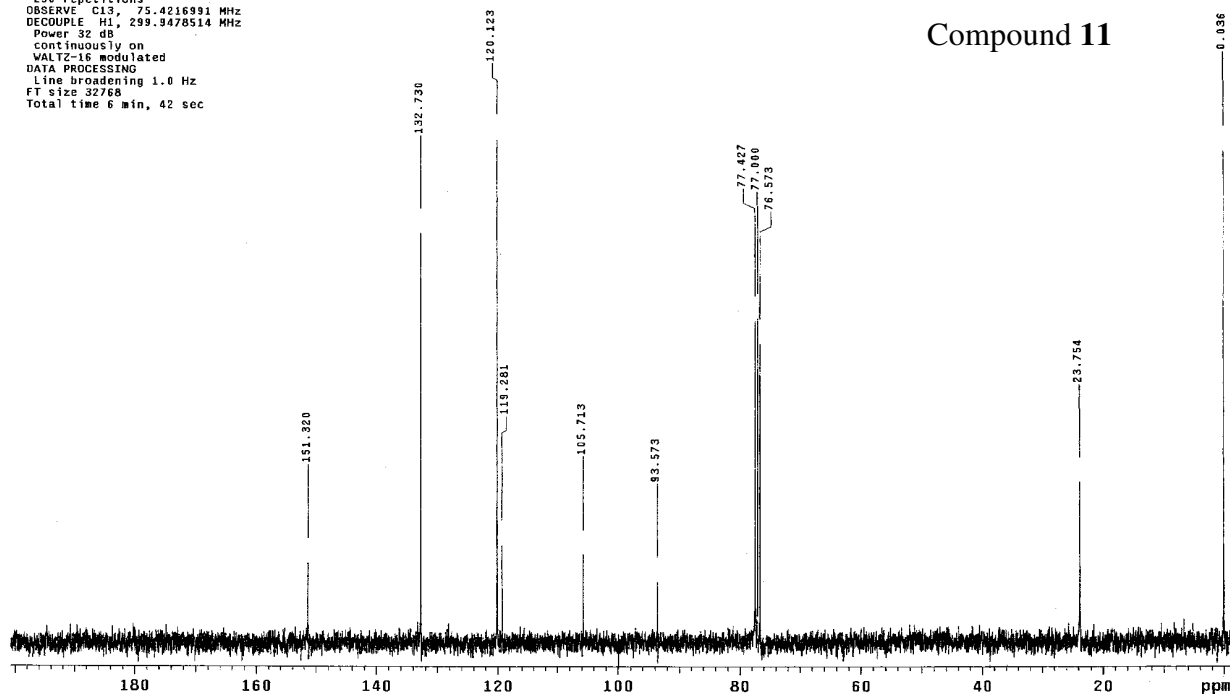

quan11020207a  
Pulse Sequence: s2pul  
Solvent: CDCl3  
Ambient temperature  
File: quan11020207a  
INNOVA-500 "acstone"  
PULSE SEQUENCE  
Relax. delay 1.000 sec  
Pulse 37.9 degrees  
Acq. time 2.500 sec  
Width 4799.0 Hz  
8 repetitions  
OBSERVE H1, 299.9468689 MHz  
DATA PROCESSING  
Line broadening 0.2 Hz  
FT size 32768  
Total time 0 min, 28 sec

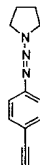

Compound 12

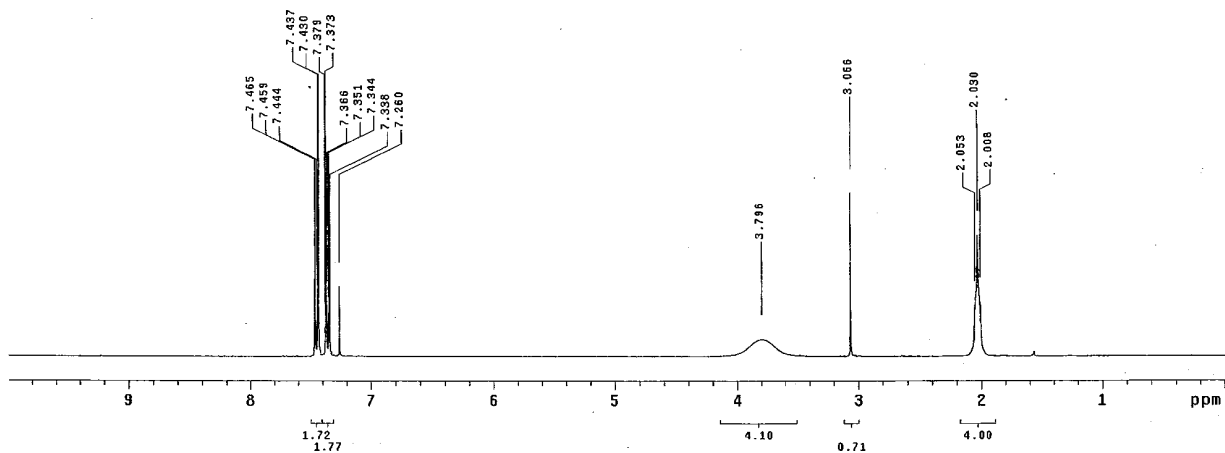



quan11020207a  
 Pulse Sequence: s2pu1  
 Solvent: CDC13  
 Ambient temperature  
 File: quan11020207a  
 INOVA-500 "acetone"  
 PULSE SEQUENCE  
 Relax. delay 1.000 sec  
 Pulse 37.9 degrees  
 Acq. time 2.500 sec  
 Width 4799.0 Hz  
 8 repetitions  
 OBSERVE H1, 299.9468689 MHz  
 DATA PROCESSING  
 Line broadening 0.2 Hz  
 FT size 32768  
 Total time 0 min, 28 sec

## Compound 12

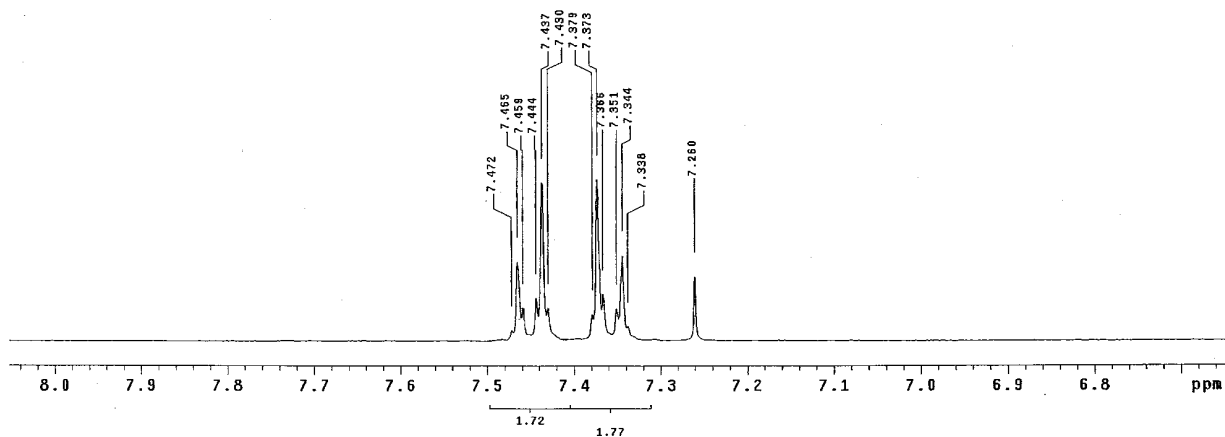

quan11020207b  
 Pulse Sequence: s2pu1  
 Solvent: CDC13  
 Ambient temperature  
 File: quan11020207b  
 INOVA-500 "acetone"  
 PULSE SEQUENCE  
 Relax. delay 1.000 sec  
 Pulse 42.6 degrees  
 Acq. time 0.599 sec  
 Width 16501.7 Hz  
 300 repetitions  
 OBSERVE C13, 75.4216995 MHz  
 DECOUPLE H1, 299.9478455 MHz  
 Power 32 dB  
 continuously on  
 WALTZ-16 modulated  
 DATA PROCESSING  
 Line broadening 1.0 Hz  
 FT size 32768  
 Total time 8 min, 3 sec

## Compound 12

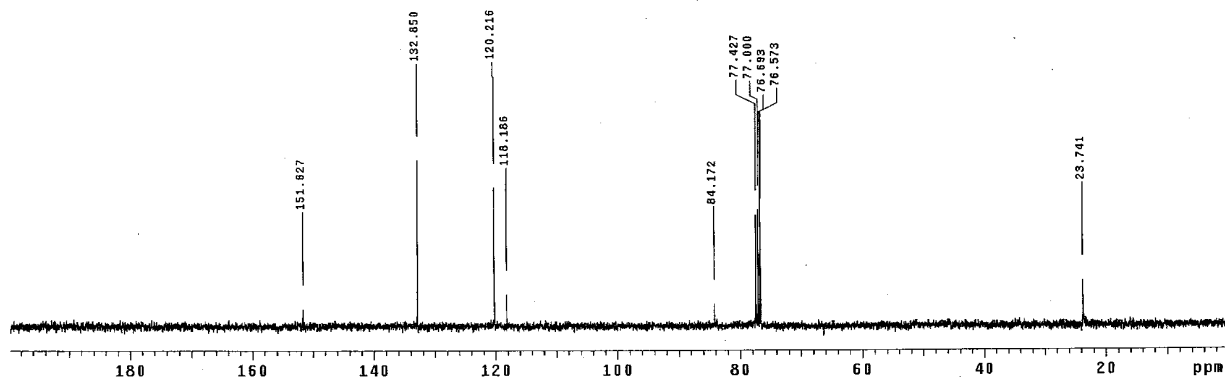

quan1i020207b  
 Pulse Sequence: s2pu1  
 Solvent: CDCl3  
 Ambient temperature  
 File: quan1i020207b  
 INOVA-500 "acetone"  
 PULSE SEQUENCE  
 Relax, delay 1.000 sec  
 Pulse 42.6 degrees  
 Acq. time 0.599 sec  
 Width 16501.7 Hz  
 300 repetitions  
 OBSERVE C13, 75.4216995 MHz  
 DECOUPLE H1, 299.9478455 MHz  
 Power 32 dB  
 Continuously on  
 WALTZ-16 modulated  
 DATA PROCESSING  
 Line broadening 1.0 Hz  
 FT size 32768  
 Total time 8 min, 3 sec

## Compound 12

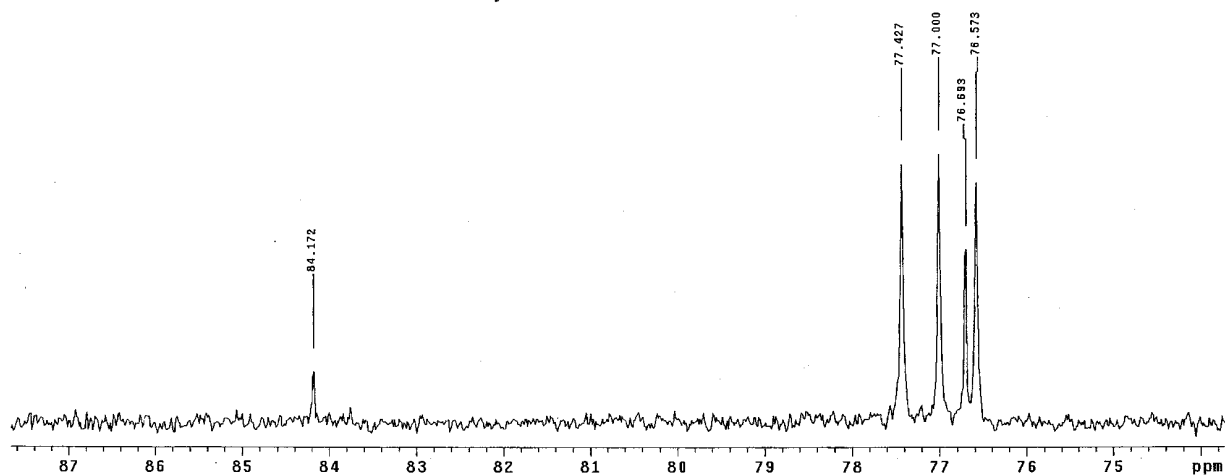

quan1i011127a  
 Pulse Sequence: s2pu1  
 Solvent: CDCl3  
 Ambient temperature  
 File: q1i011127a  
 INOVA-500 "acetone"  
 PULSE SEQUENCE  
 Relax, delay 1.000 sec  
 Pulse 37.9 degrees  
 Acq. time 2.500 sec  
 Width 4799.0 Hz  
 8 repetitions  
 OBSERVE H1, 299.9468689 MHz  
 DATA PROCESSING  
 Line broadening 0.2 Hz  
 FT size 32768  
 Total time 0 min, 28 sec

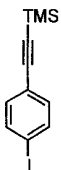

## Compound 13

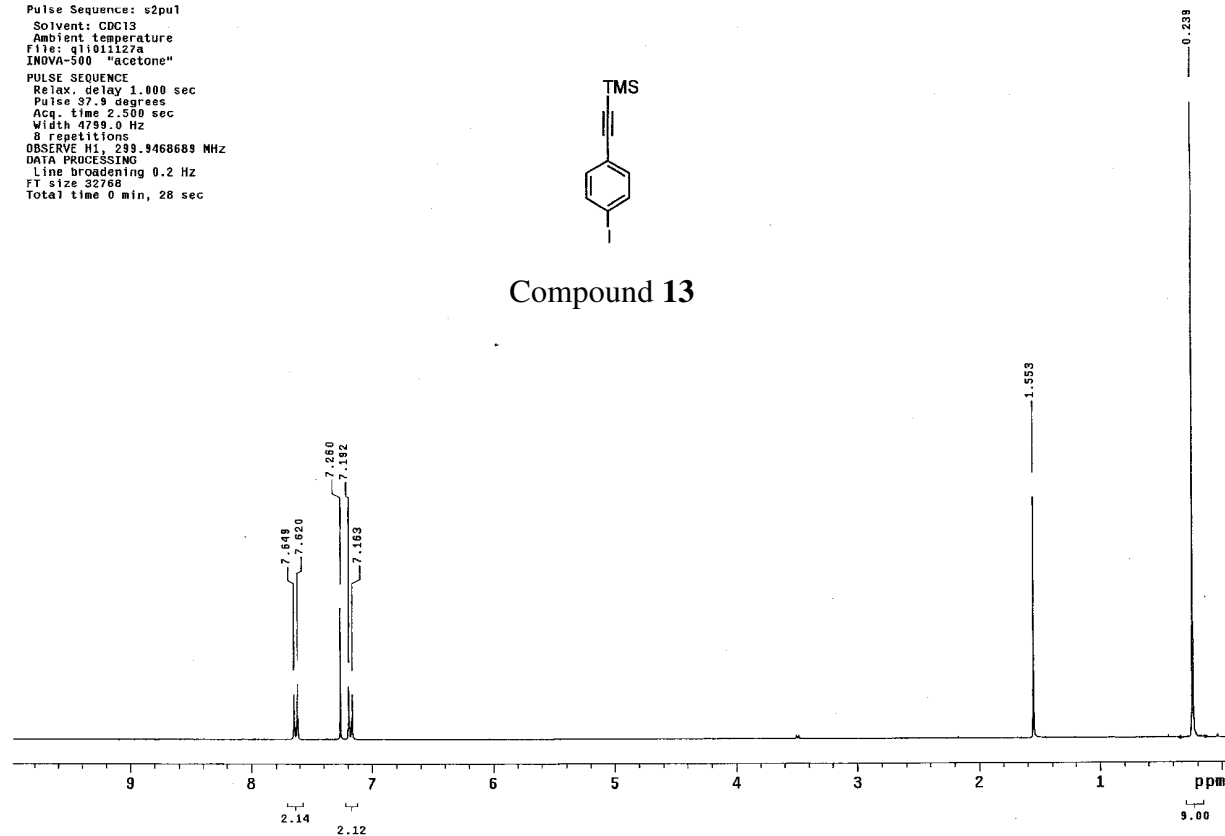

quant1011127b  
 Pulse Sequence: s2pu1  
 Solvent: CDCl3  
 Ambient temperature  
 File: q1011127b  
 INOVA-500 "acetone"  
 PULSE SEQUENCE  
 Relax. delay 1.000 sec  
 Pulse 42.6 degrees  
 Acq. time 0.589 sec  
 Width 16501.7 Hz  
 200 repetitions  
 OBSERVE C13, 75.4216995 MHz  
 DECOUPLE H1, 299.9478455 MHz  
 Power 32 dB  
 continuously on  
 WALTZ-16 modulated  
 DATA PROCESSING  
 Line broadening 1.0 Hz  
 FT size 32768  
 Total time 5 min, 22 sec

# Compound 13

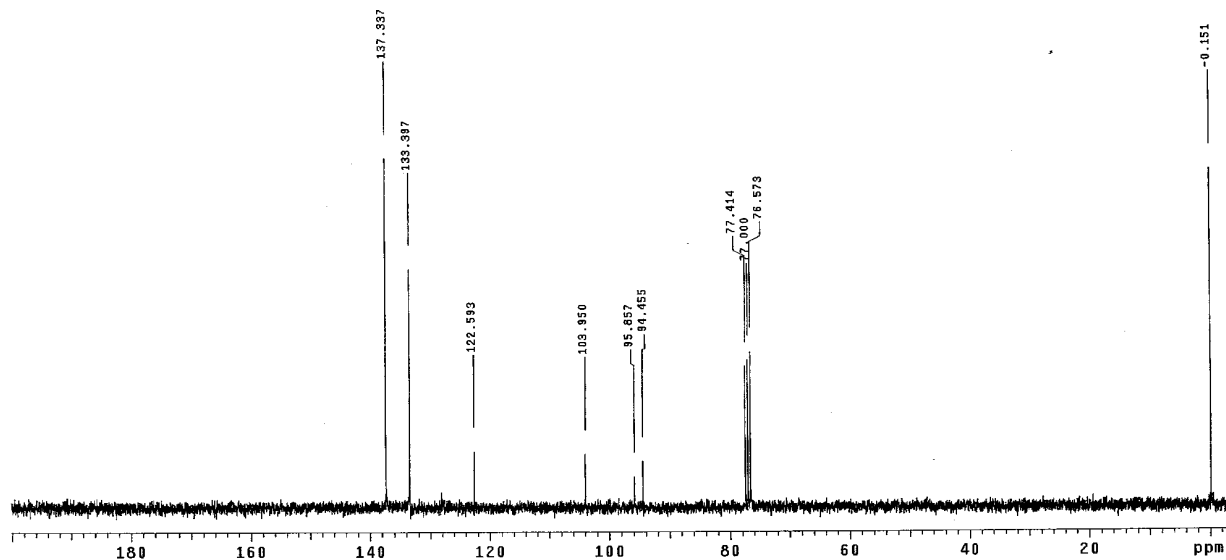

q11-280  
 Pulse Sequence: s2pu1

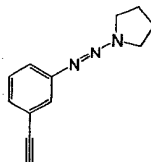

# Compound 15

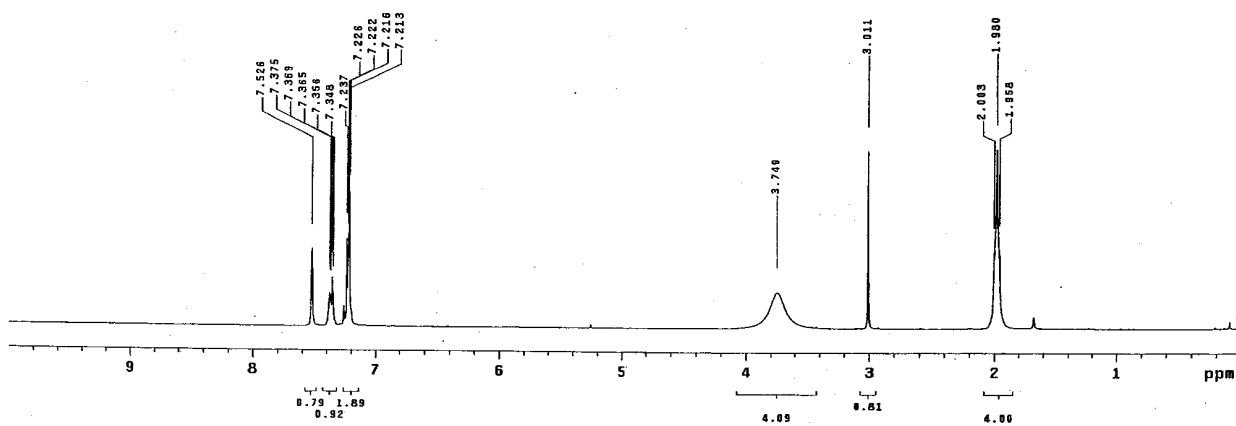

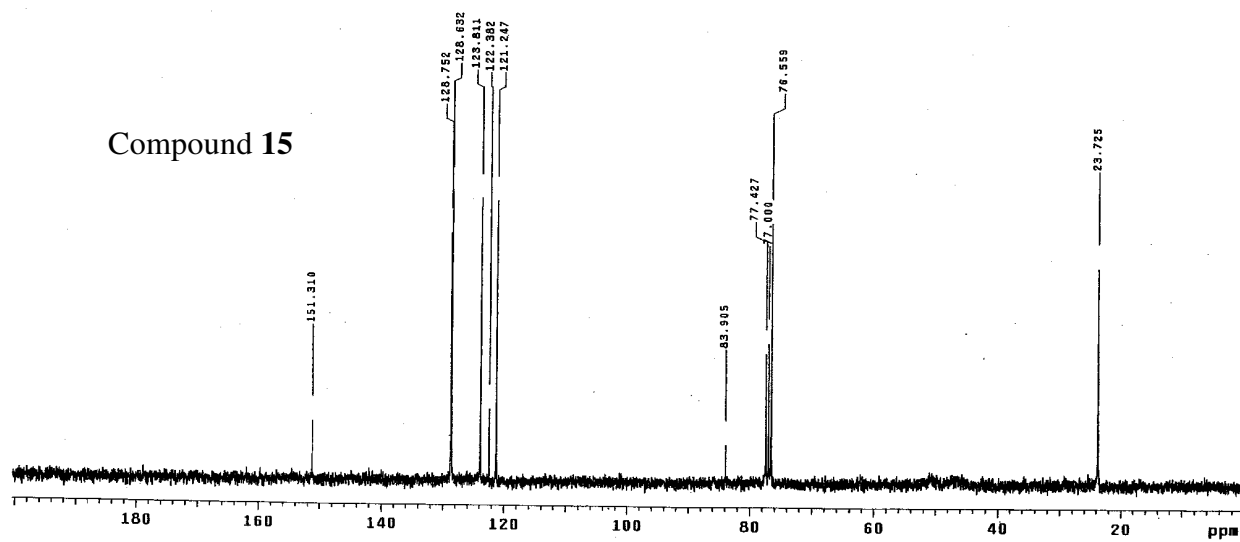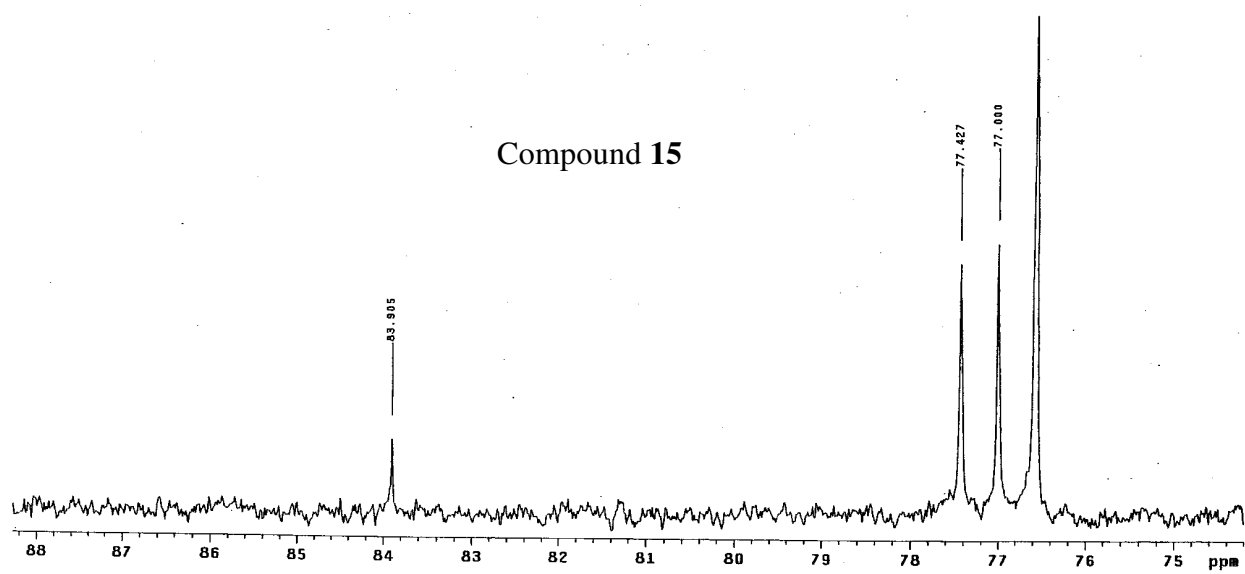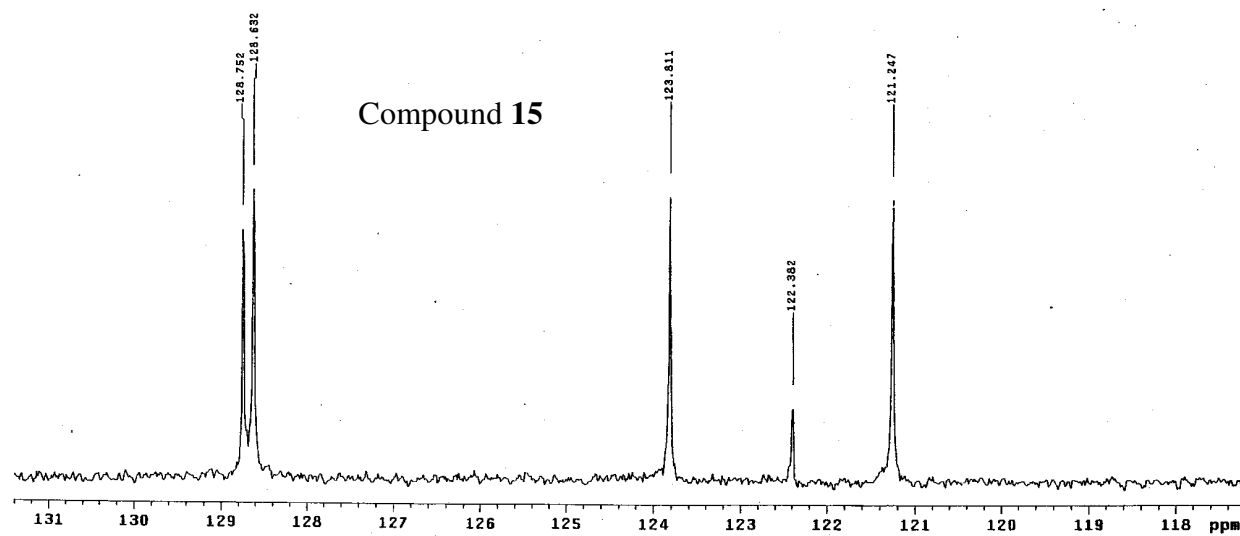

quant1020802a

Pulse Sequence: s2pul

Solvent: CDCl<sub>3</sub>

Ambient temperature

INOVA-300 "sunofmr"

PULSE SEQUENCE

Relax. delay 1.000 sec

Pulse 37.5 degrees

Acq. time 2.501 sec

Width 4799.0 Hz

0 repetitions

OBSERVE H1, 299.9468615 MHz

DATA PROCESSING

Line broadening 0.2 Hz

FT size 32768

Total time 0 min, 28 sec

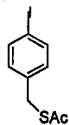

Thioacetic acid S-(4-iodo-benzyl) ester

Compound 16

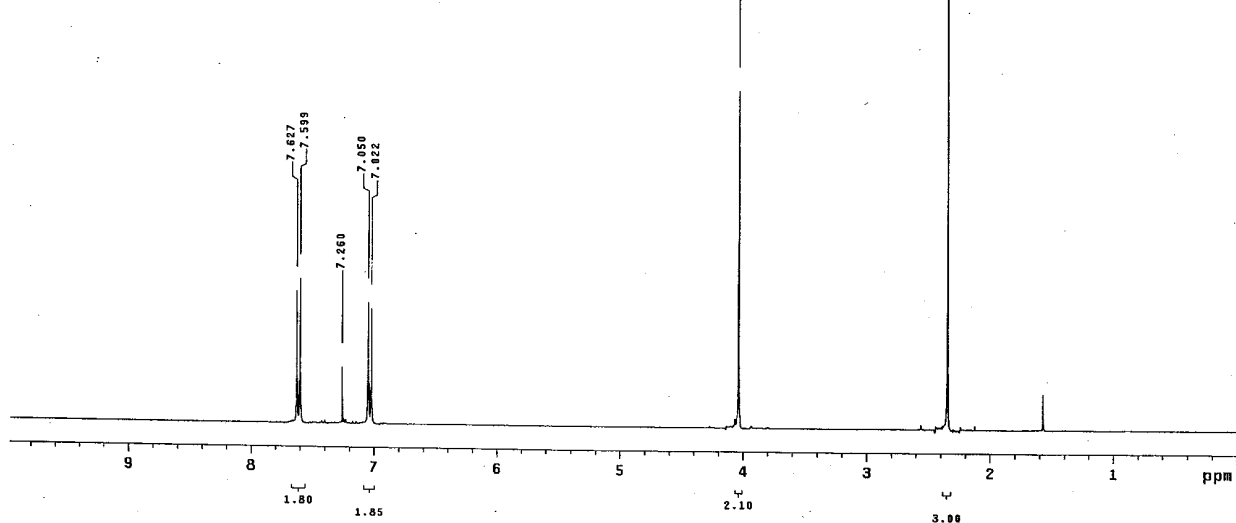

quant1020802b

Pulse Sequence: s2pul

Solvent: CDCl<sub>3</sub>

Ambient temperature

INOVA-300 "sunofmr"

PULSE SEQUENCE

Relax. delay 1.000 sec

Pulse 42.5 degrees

Acq. time 0.599 sec

Width 18561.7 Hz

390 repetitions

OBSERVE C13, 75.4217001 MHz

DECOUPLE H1, 299.9470514 MHz

Power 32 dB

continuously on

WALTZ-16 modulated

DATA PROCESSING

Line broadening 1.0 Hz

FT size 32768

Total time 8 min, 2 sec

Compound 16

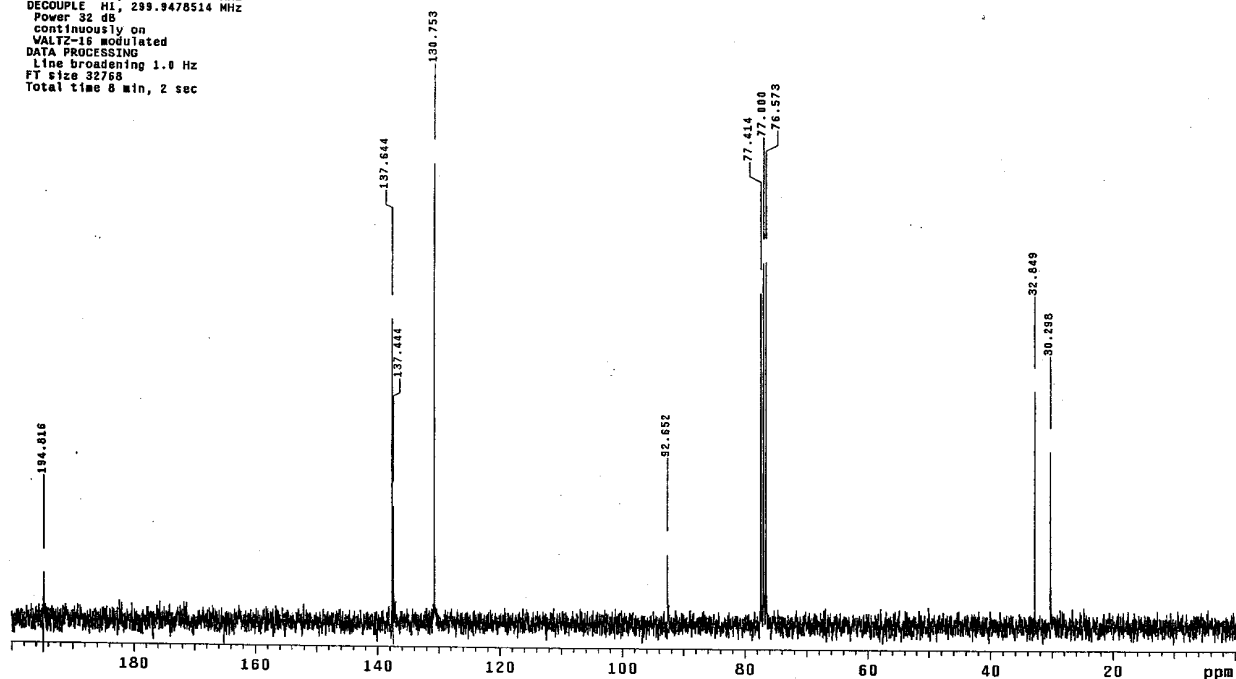

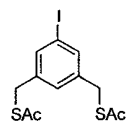

Compound 17

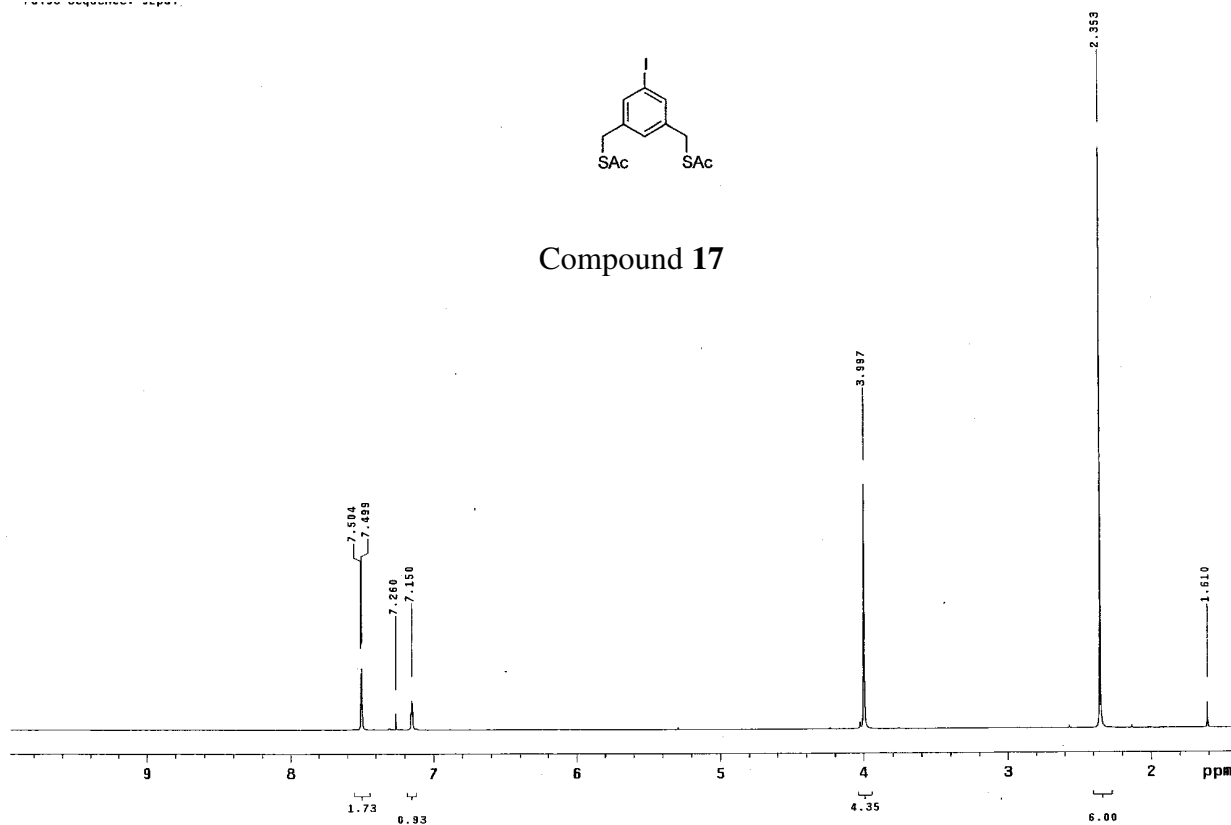

Compound 17

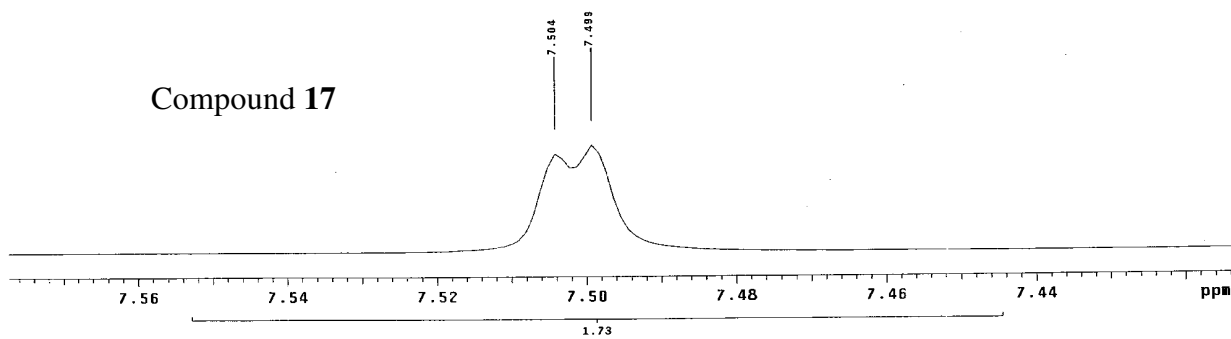

Compound 17

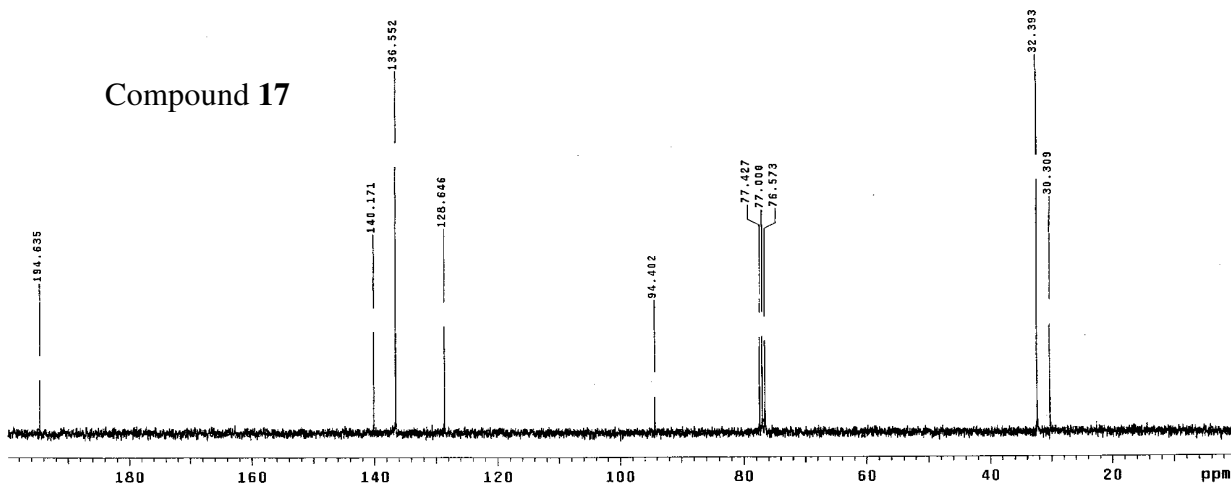

q11-261-t-37b  
Pulse Sequence: szpul

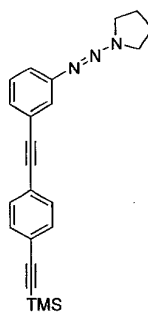

Compound 18

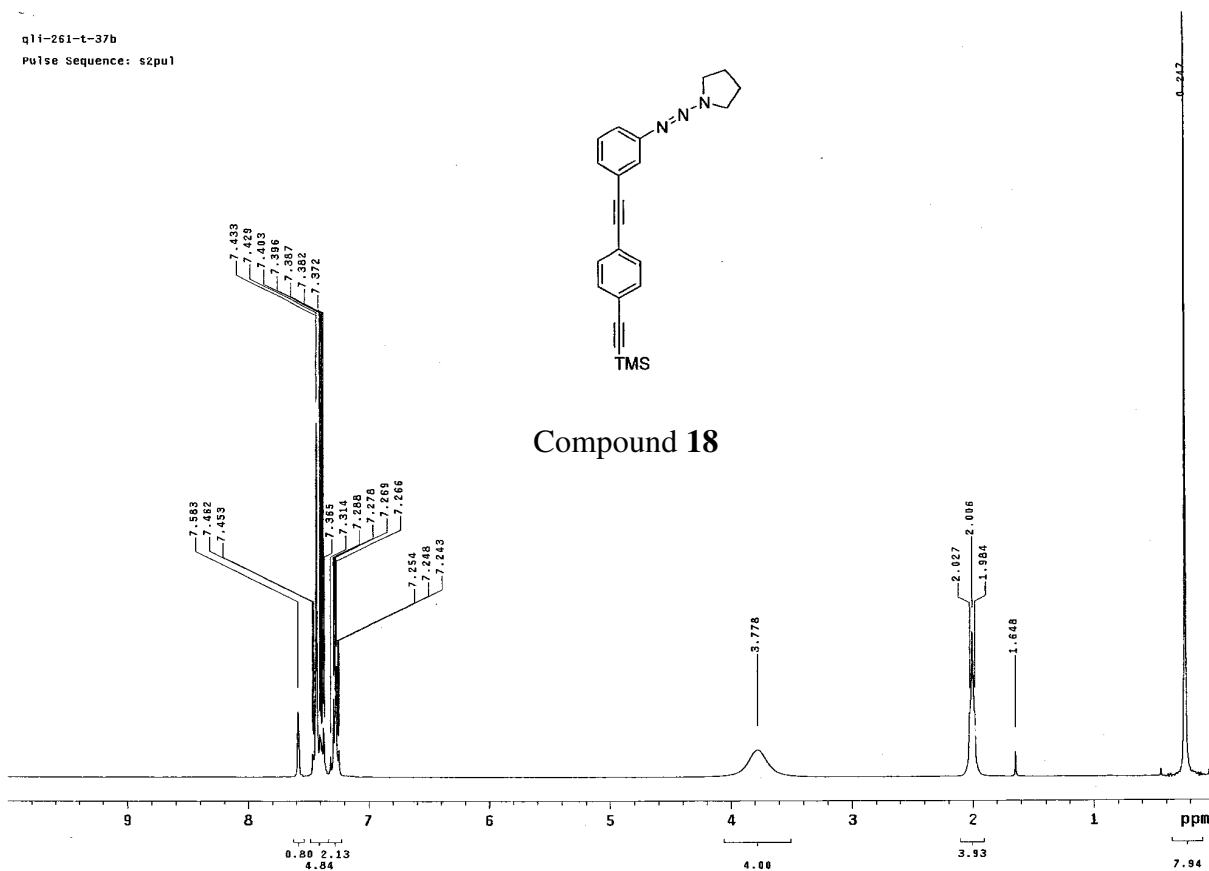

Compound 18

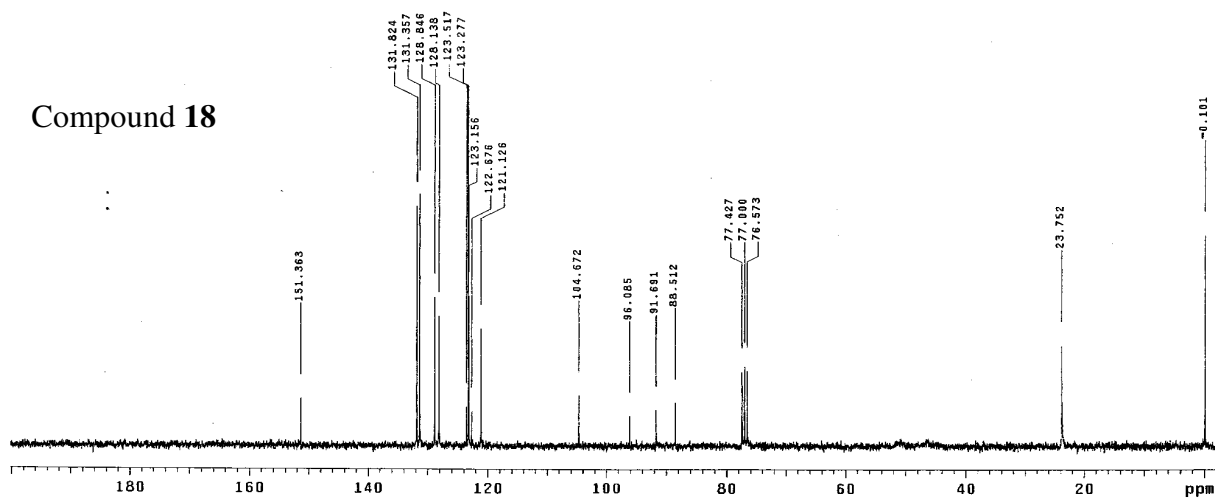

Compound 18

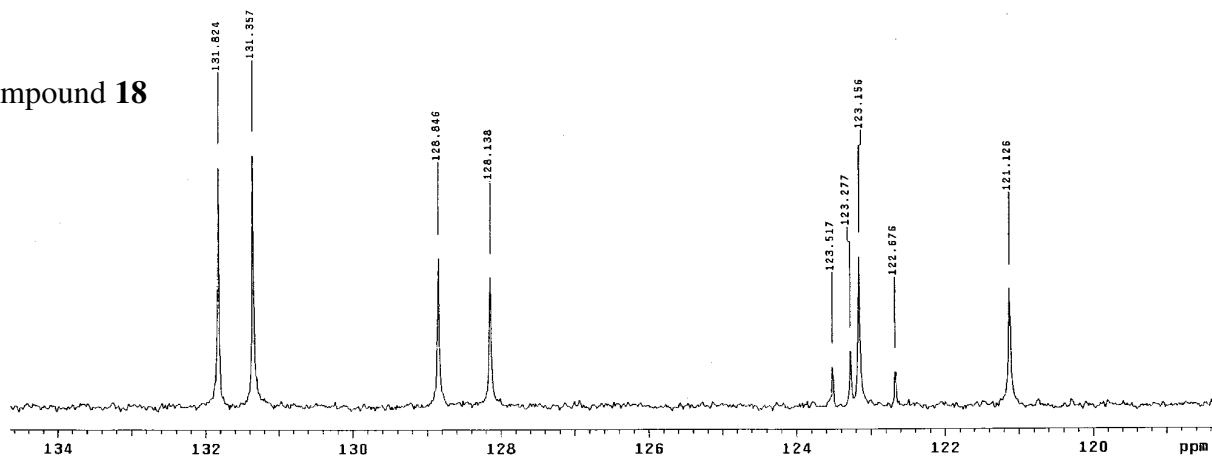

q11-266-t-24  
Pulse Sequence: s2pu1

Compound 19

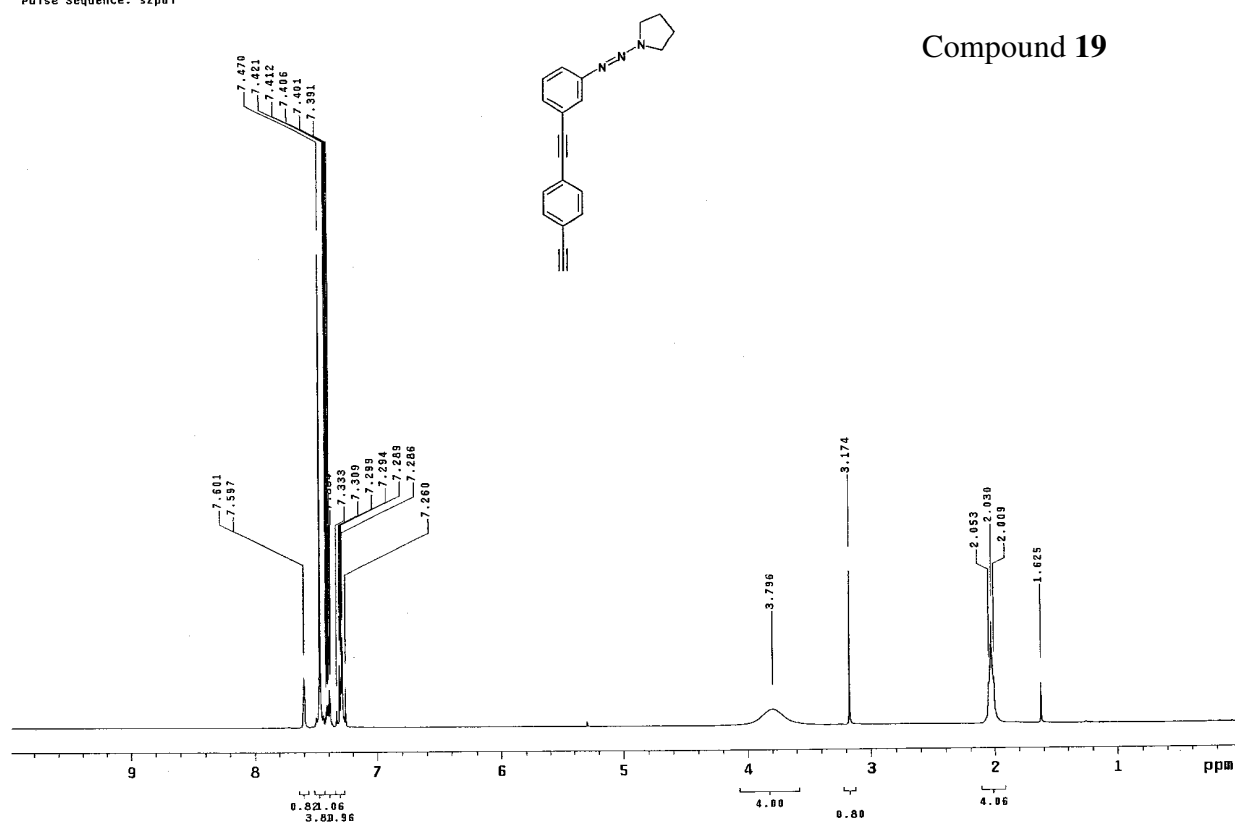



q11-266-t-24  
Pulse Sequence: szpul

# Compound 19

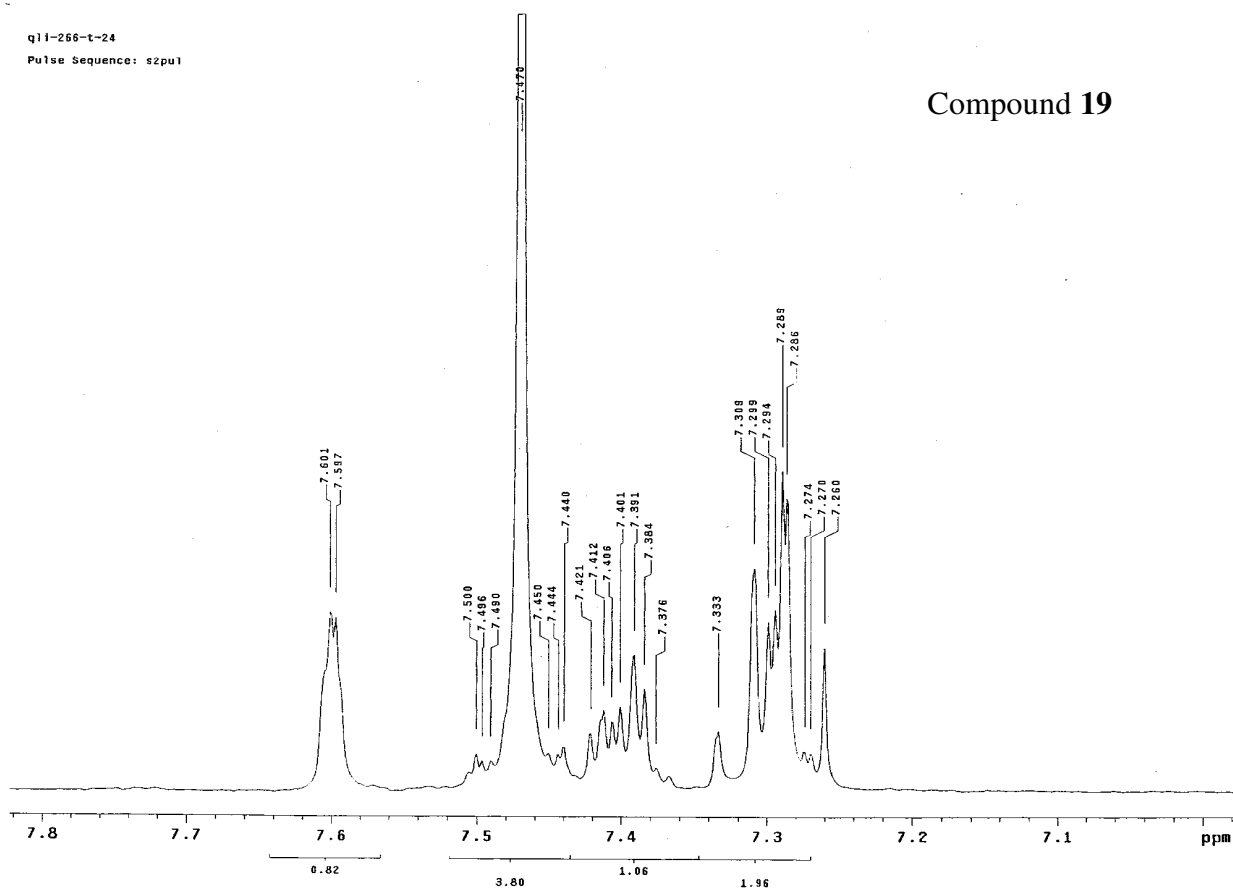

# Compound 19

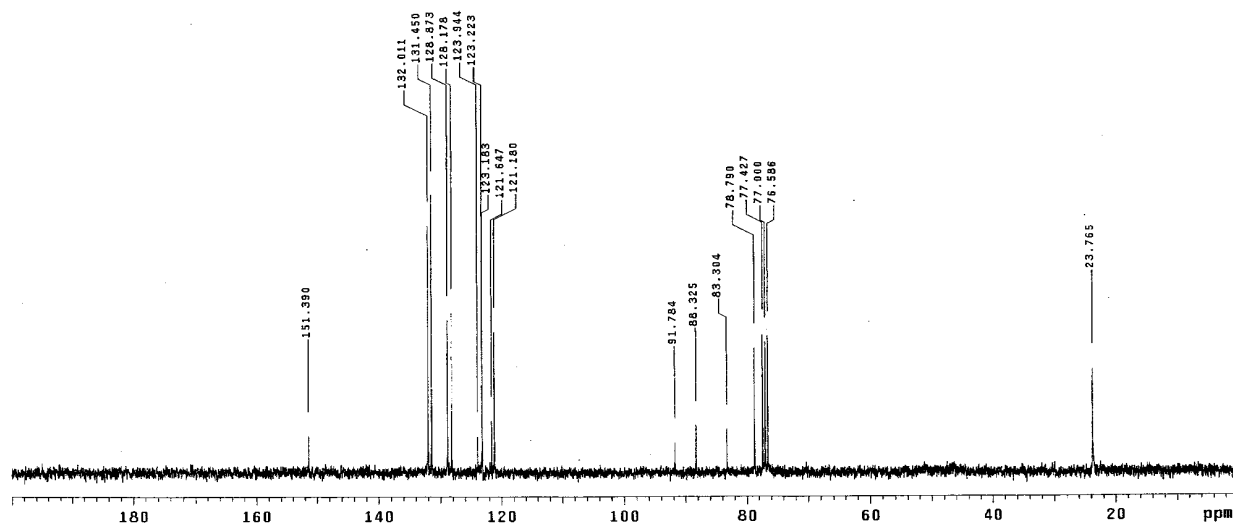

# Compound 19

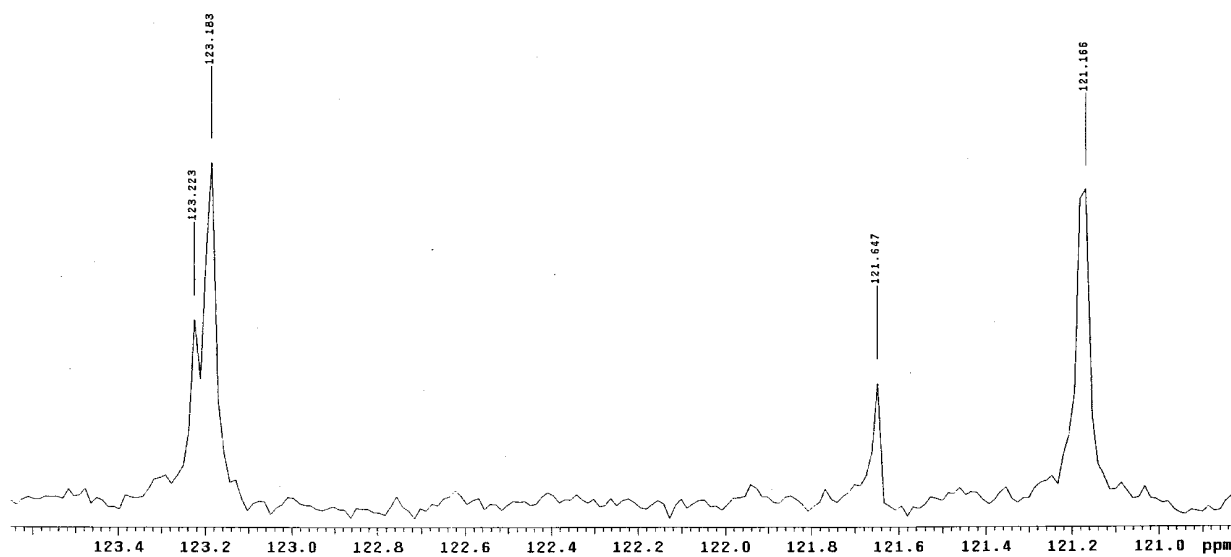

q11-258

Pulse Sequence: s2pu1

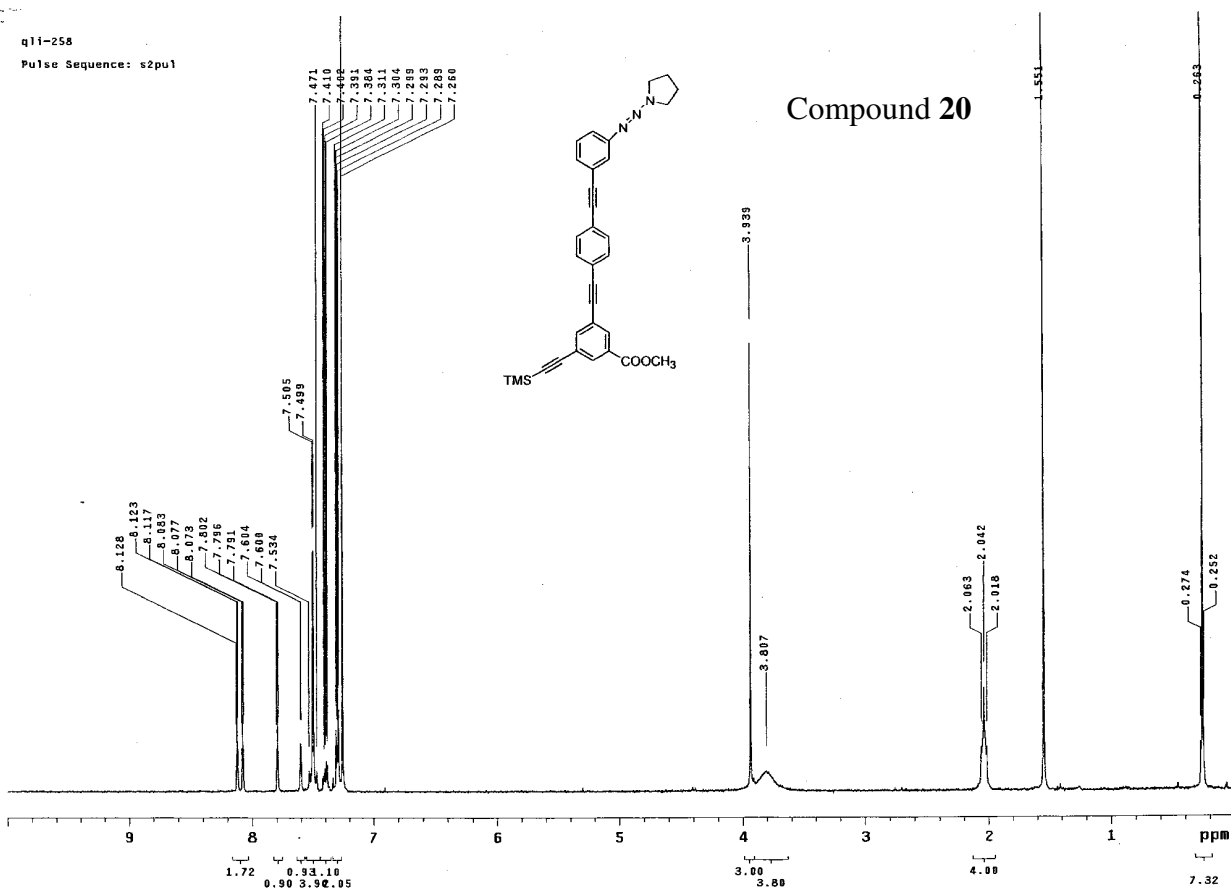

q11-258  
Pulse Sequence: s2pu1

# Compound 20

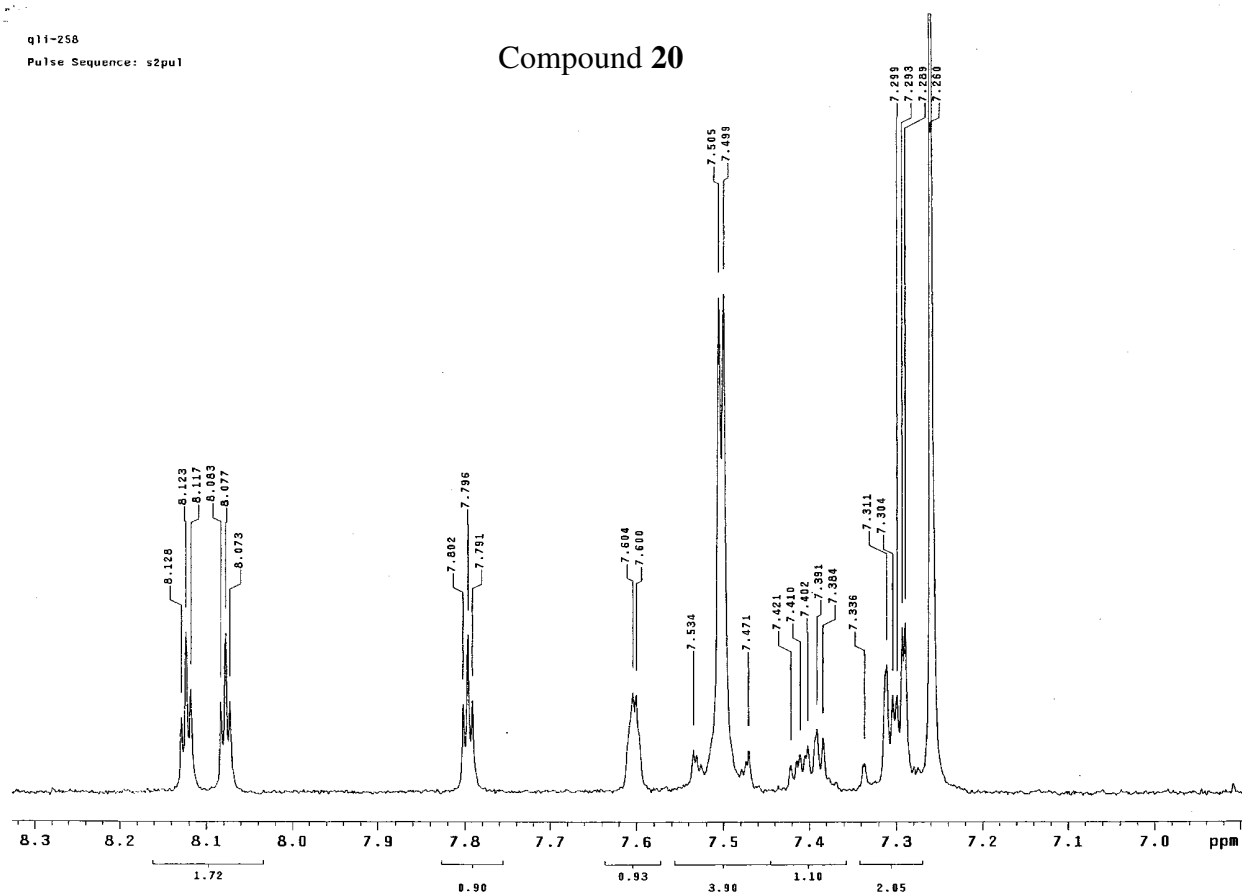

# Compound 20

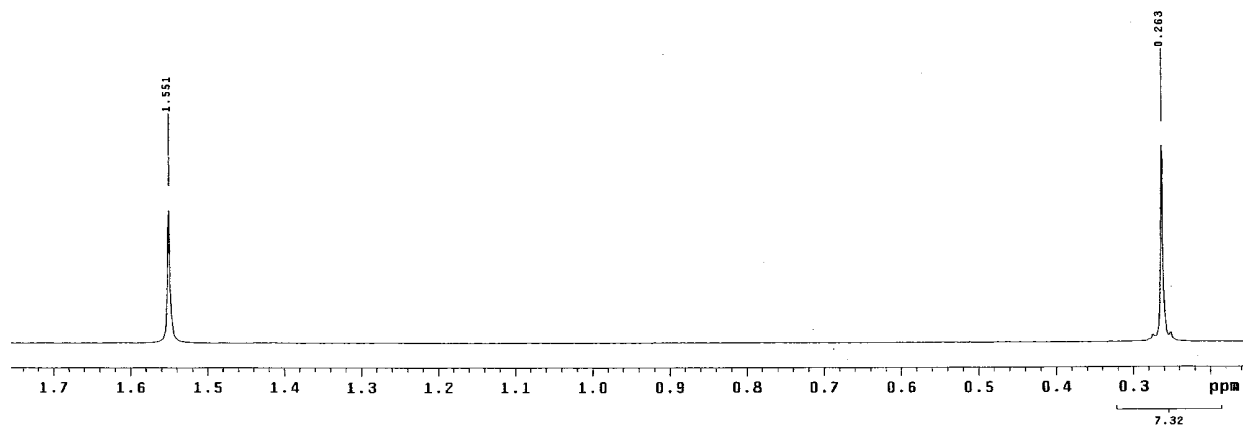

Compound 20

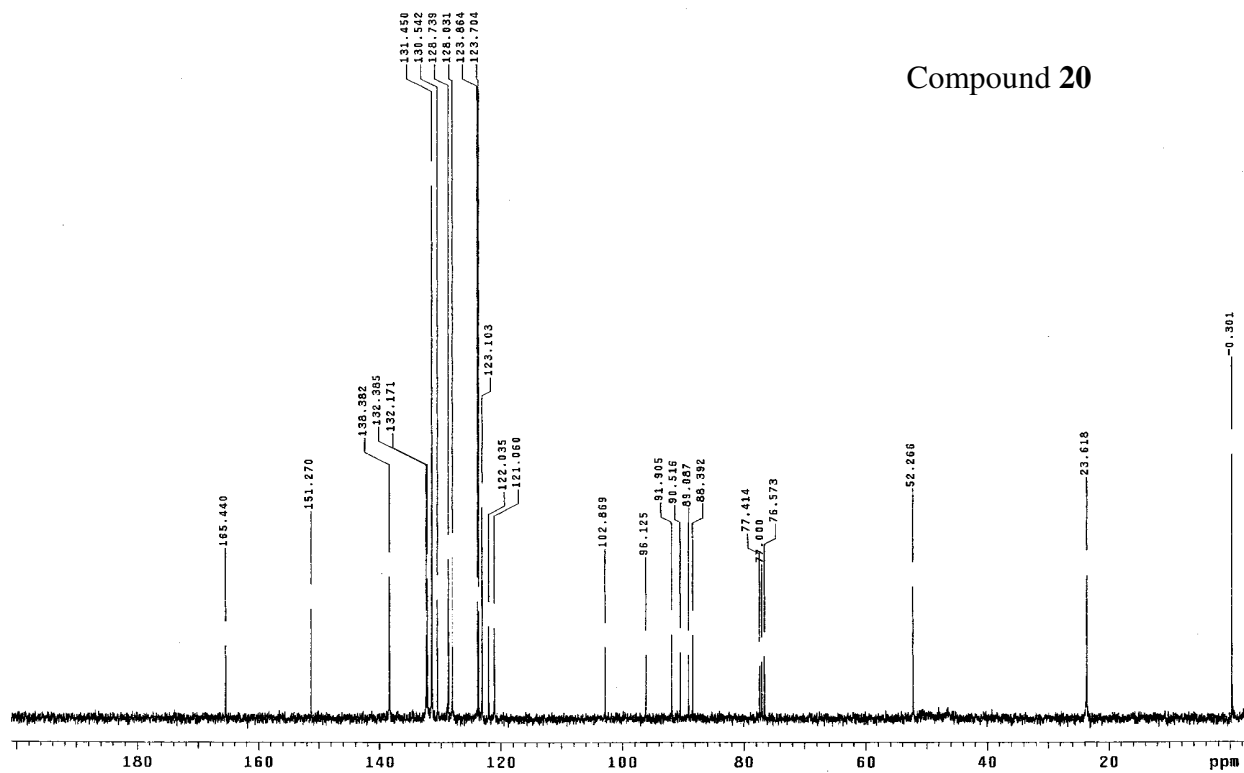

Compound 20

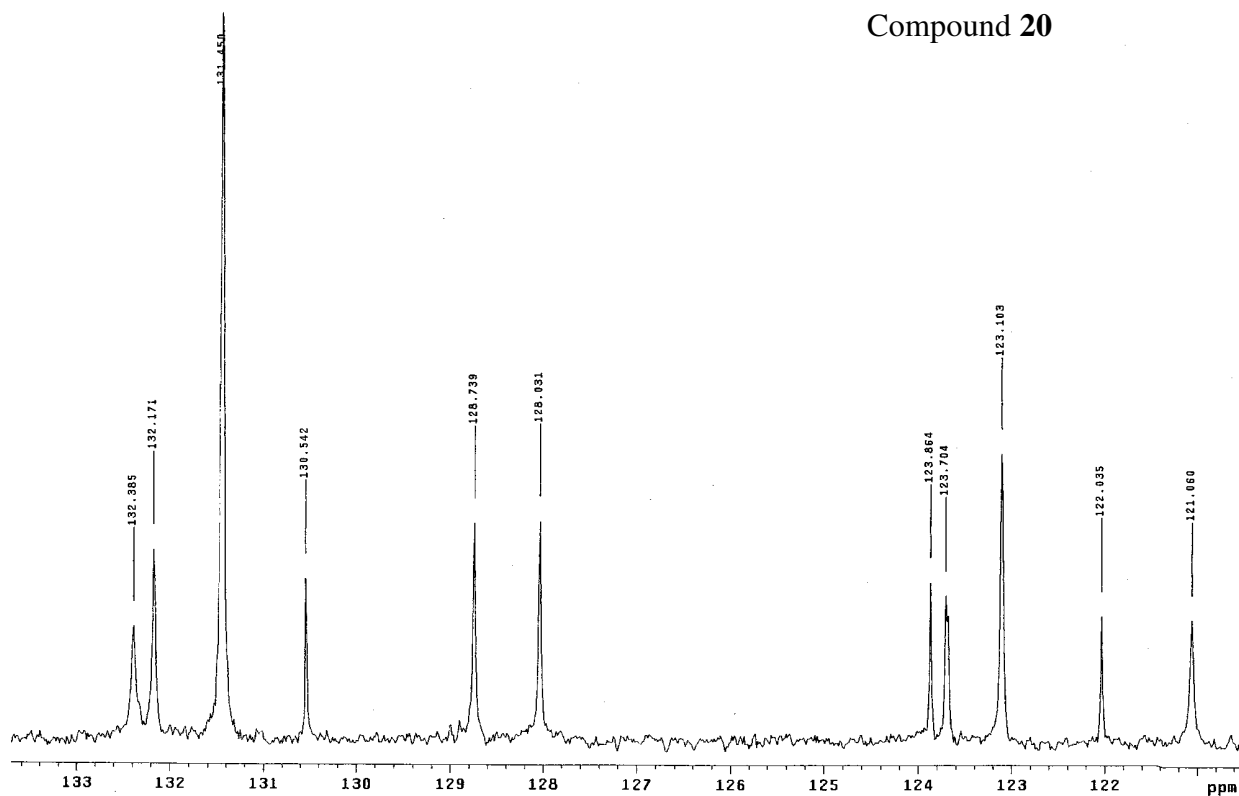

# Compound 20

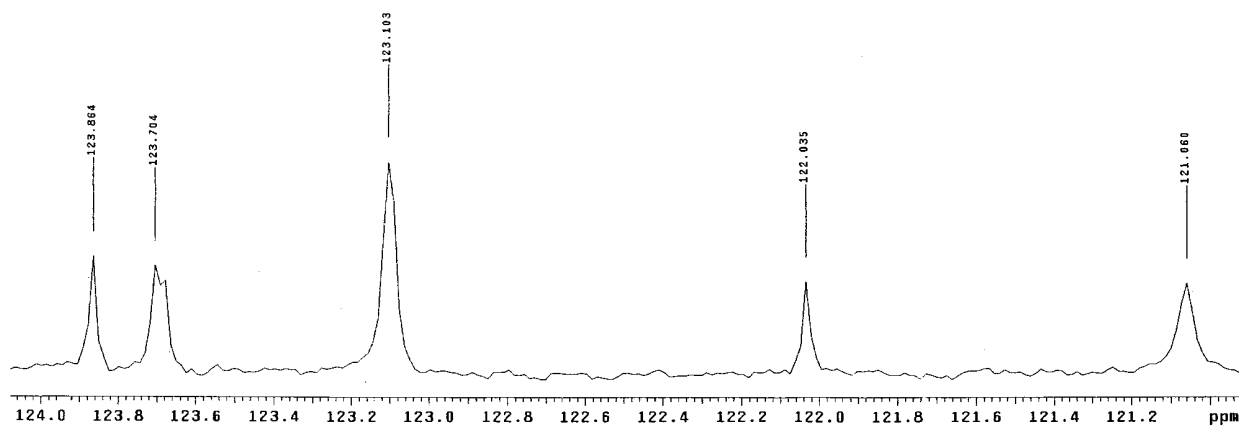

Changshu021007e  
Pulse Sequence: s2pu1

# Compound 21

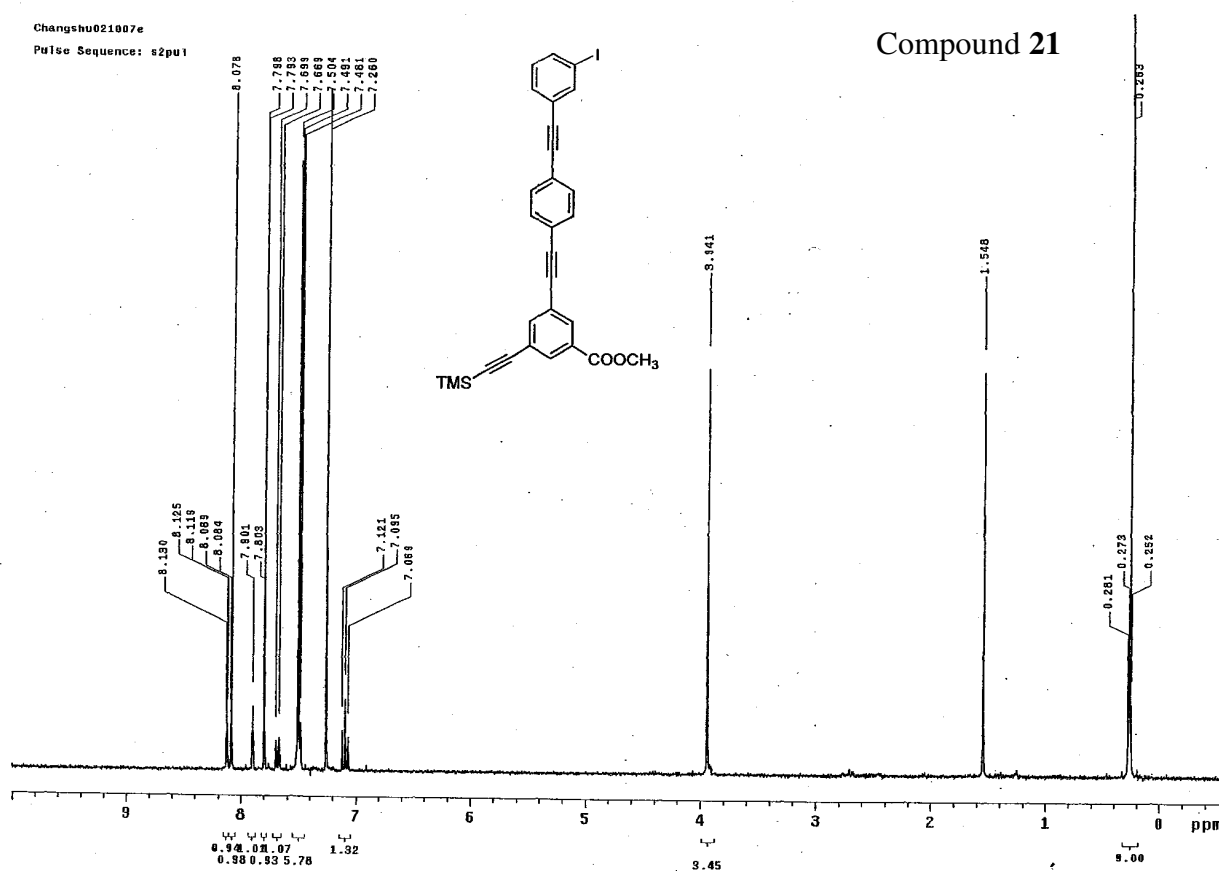

Changshu021997e  
Pulse Sequence: s2pu1

### Compound 21

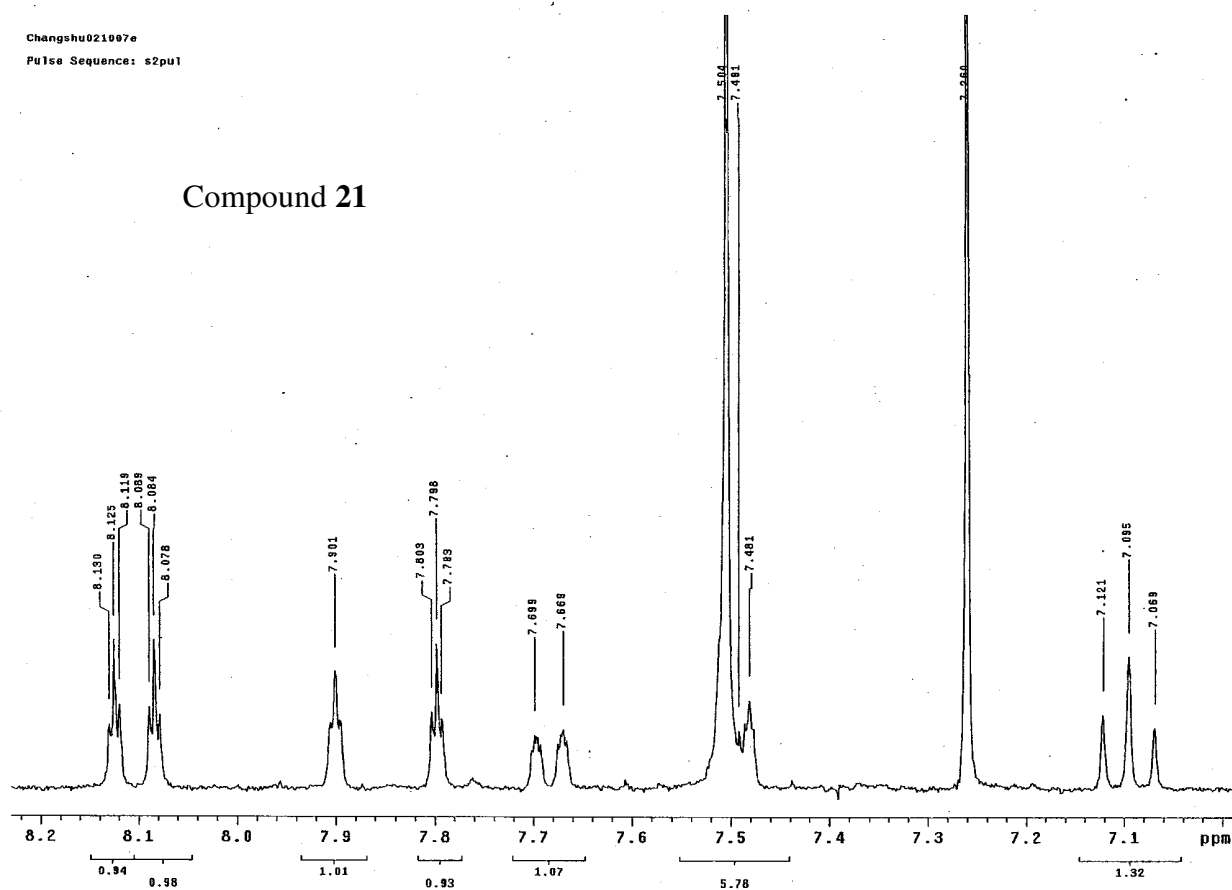

### Compound 21

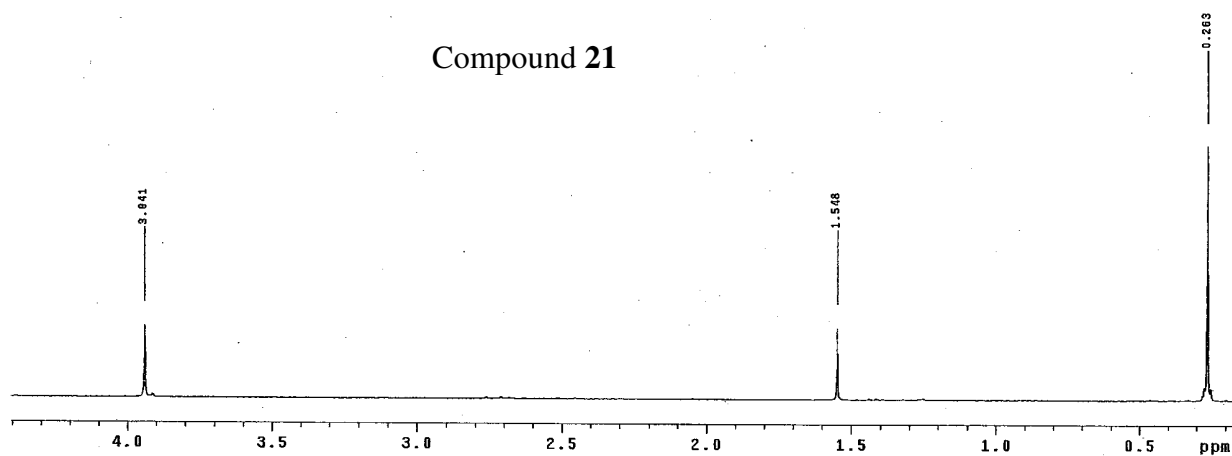

changshu021007  
Pulse Sequence: szpul

# Compound 21

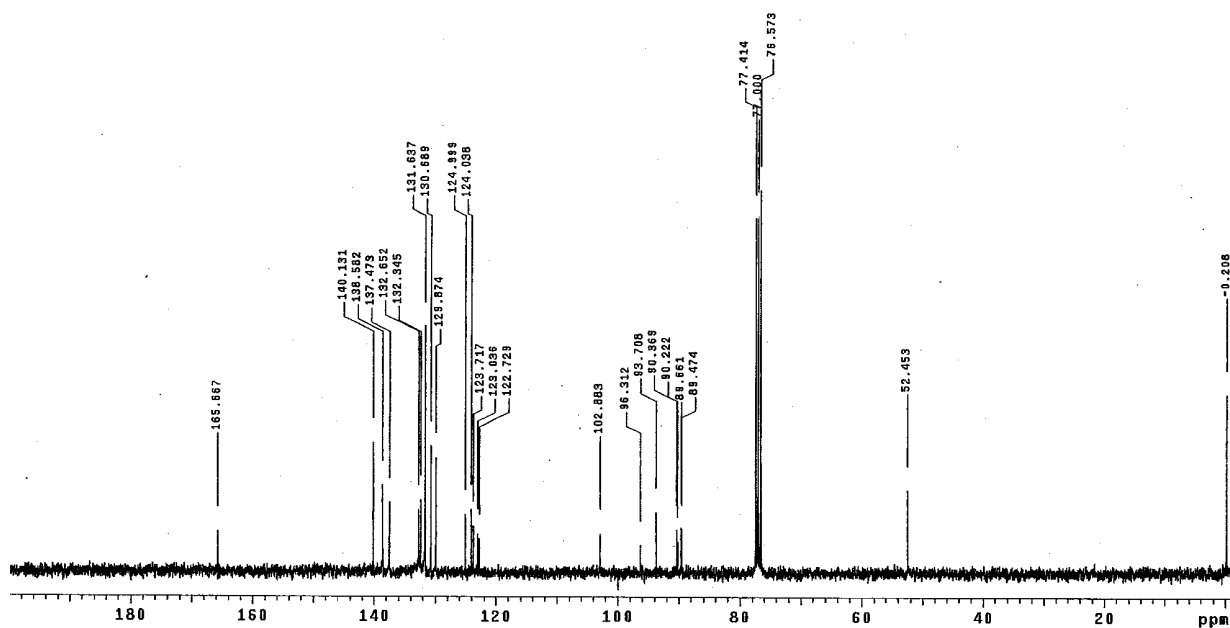

changshu021007  
Pulse Sequence: szpul

# Compound 21

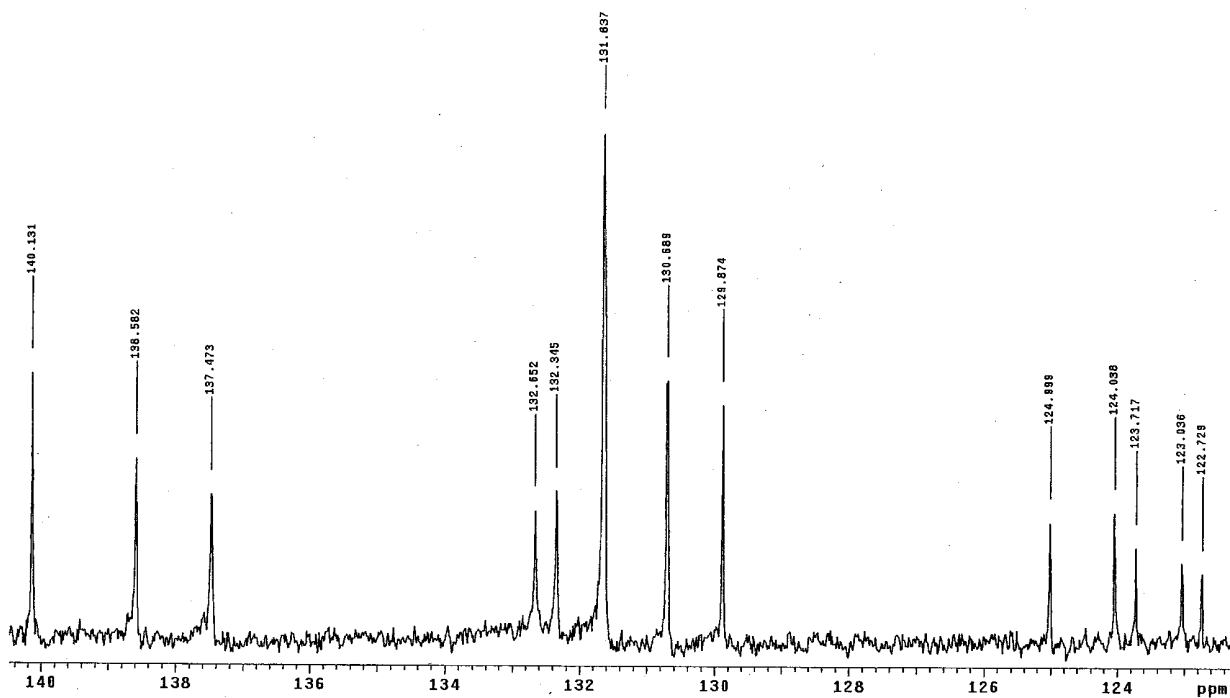

# Compound 21

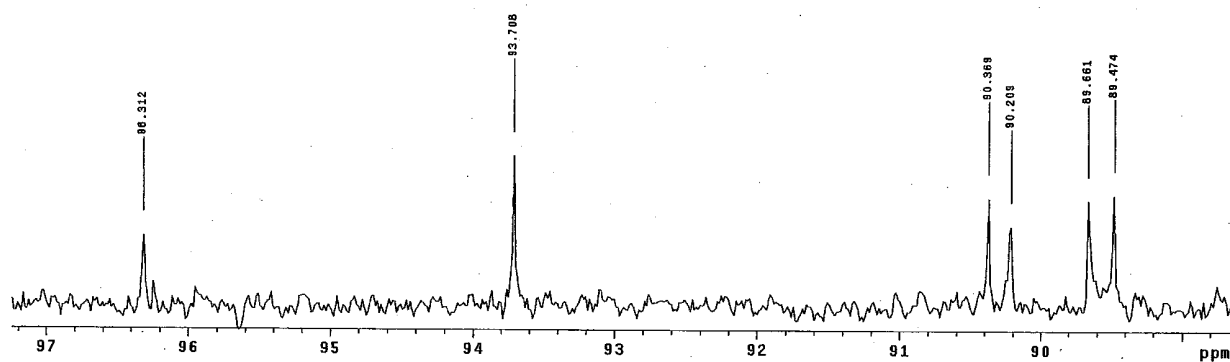

cj-44A

Pulse Sequence: s2pul

Solvent: CDCl<sub>3</sub>

Ambient temperature

INOVA-300 "sunofnmr"

PULSE SEQUENCE

Relax. delay 1.000 sec

Pulse 37.9 degrees

Acq. time 2.501 sec

Width 4799.0 Hz

8 repetitions

OBSERVE H1, 299.9325262 MHz

DATA PROCESSING

Line broadening 0.2 Hz

FT size 32768

Total time 0 min, 28 sec

# Compound 23

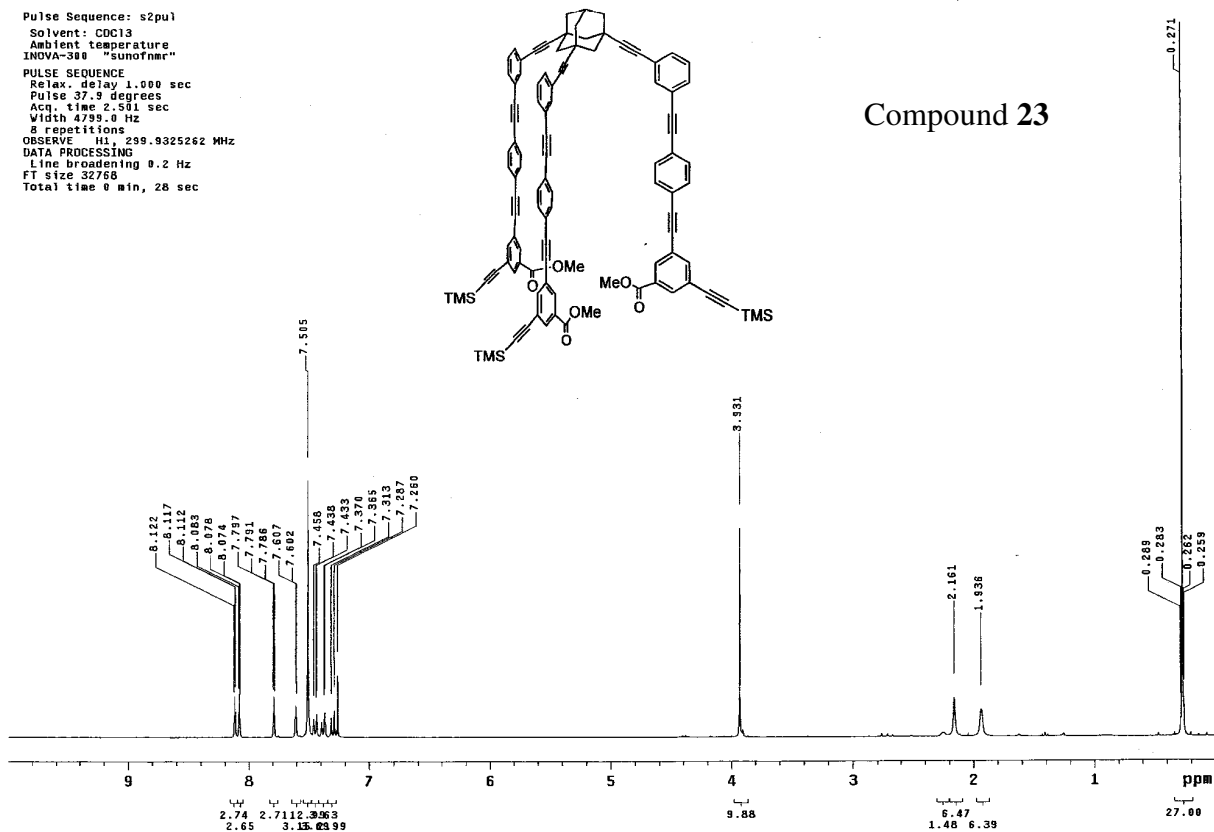



cj-44A  
 Pulse Sequence: s2pu1  
 Solvent: CDCl3  
 Ambient temperature  
 INOVA-300 "sunofmr"  
 PULSE SEQUENCE  
 Relax. delay 1.000 sec  
 Pulse 37.9 degrees  
 Acq. time 2.581 sec  
 Width 4799.8 Hz  
 8 repetitions  
 OBSERVE H1, 299.9325262 MHz  
 DATA PROCESSING  
 Line broadening 0.2 Hz  
 FT size 32768  
 Total time 0 min, 28 sec

# Compound 23

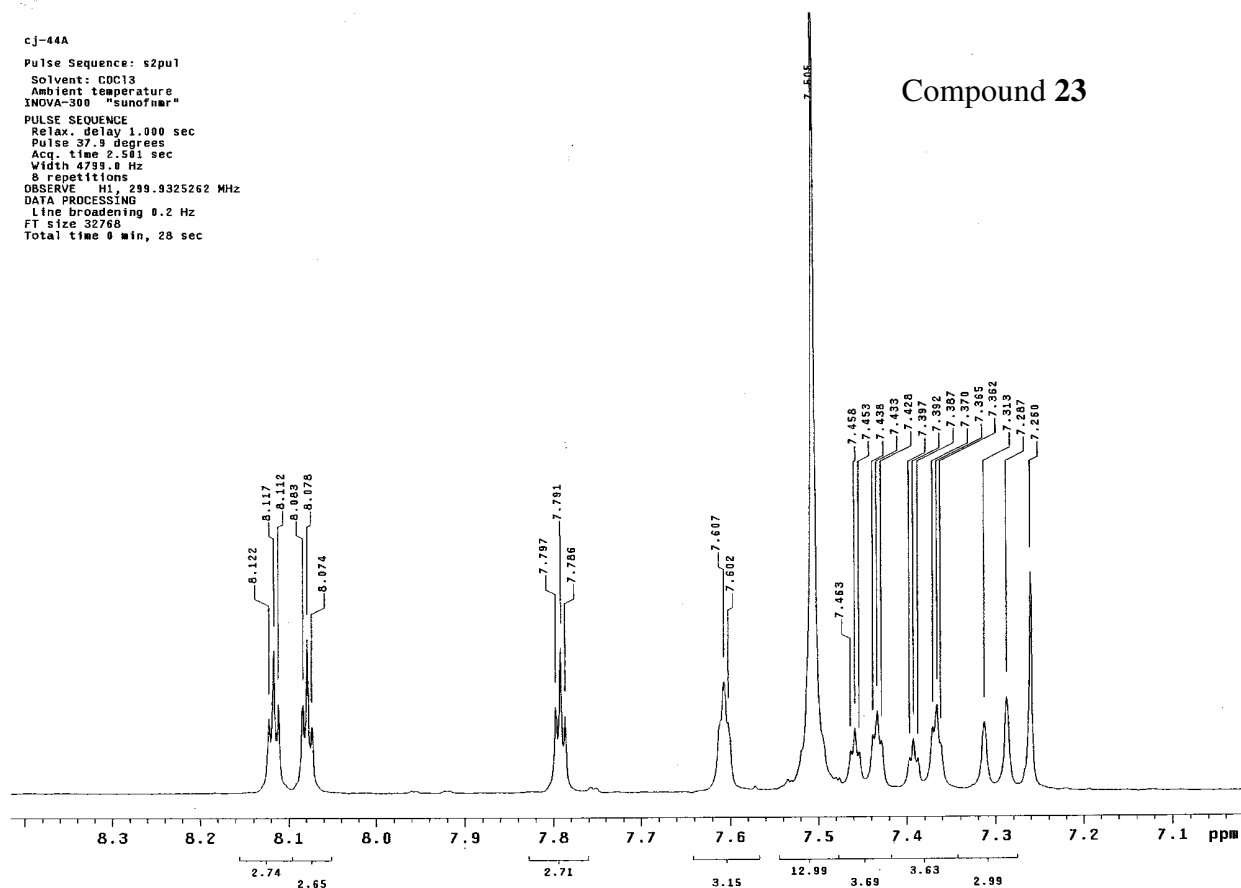

cj-44A  
 Pulse Sequence: s2pu1  
 Solvent: CDCl3  
 Ambient temperature  
 INOVA-300 "sunofmr"  
 PULSE SEQUENCE  
 Relax. delay 1.000 sec  
 Pulse 37.9 degrees  
 Acq. time 2.581 sec  
 Width 4799.8 Hz  
 8 repetitions  
 OBSERVE H1, 299.9325262 MHz  
 DATA PROCESSING  
 Line broadening 0.2 Hz  
 FT size 32768  
 Total time 0 min, 28 sec

# Compound 23

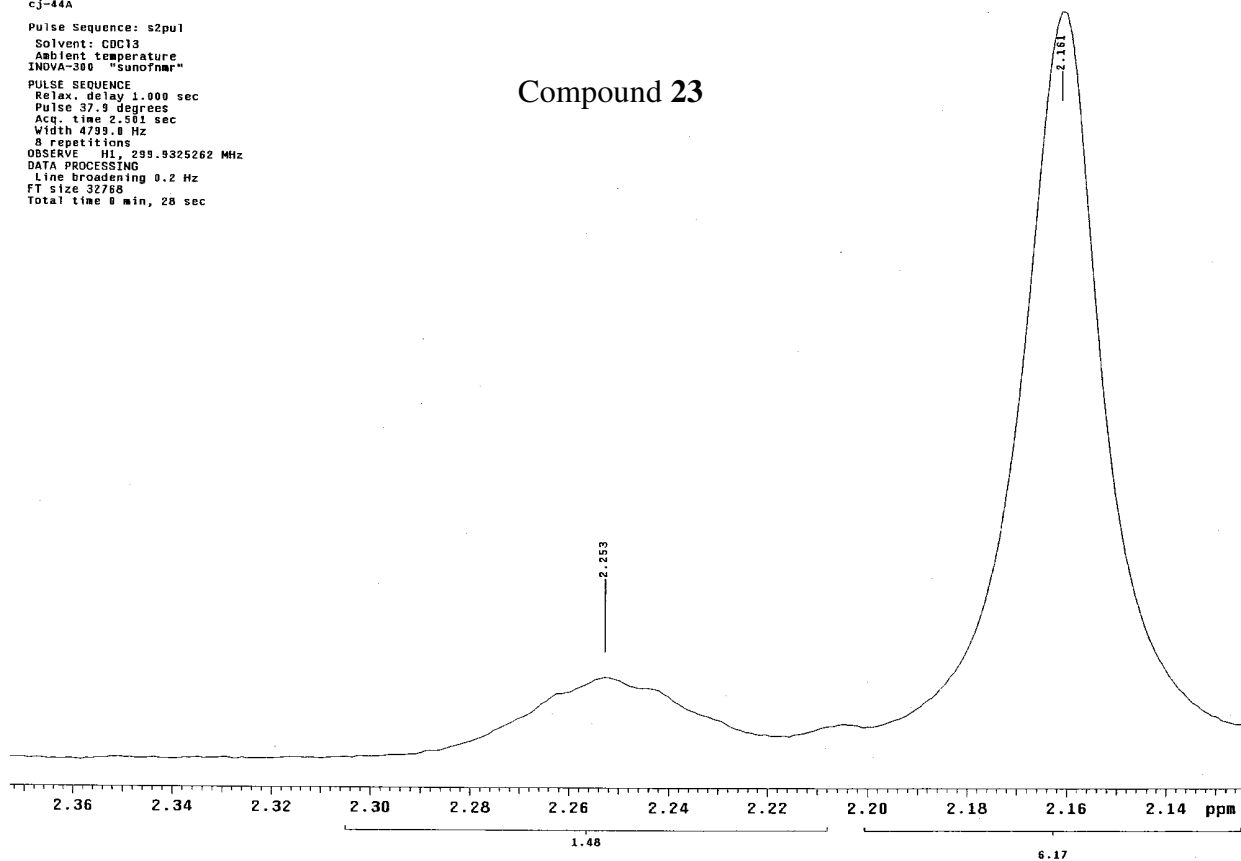

### Compound 23

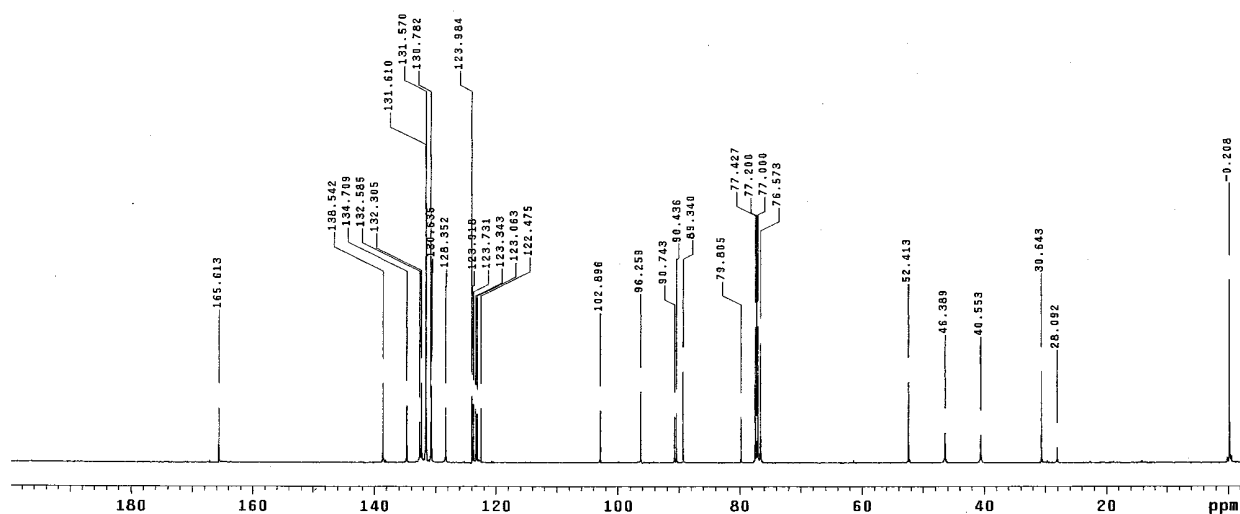

### Compound 23

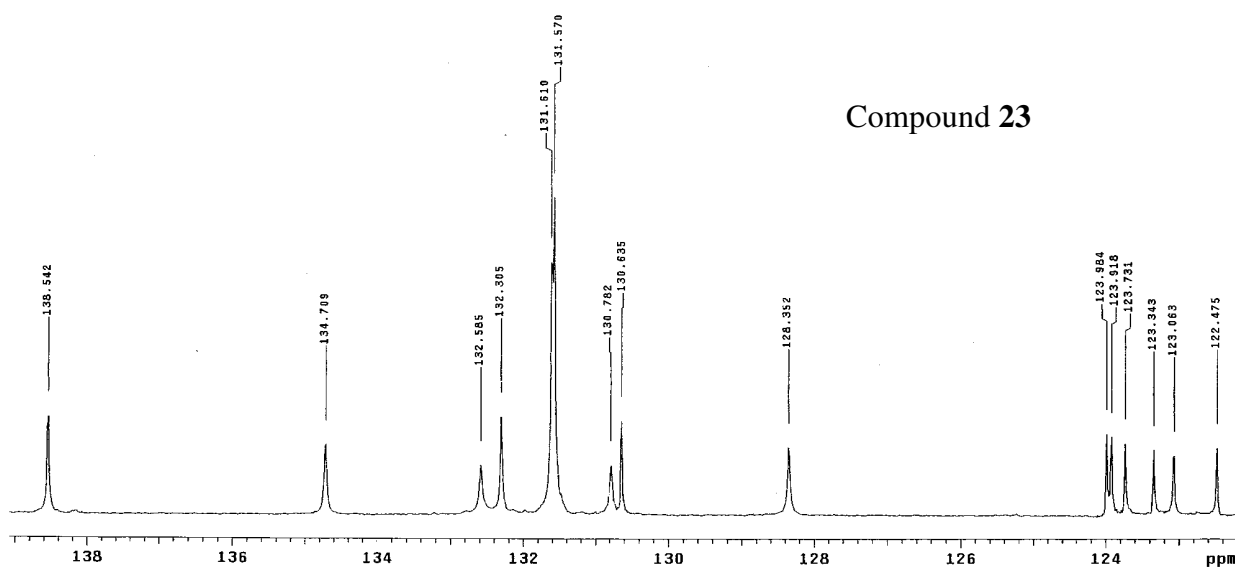

cj-44A

Pulse Sequence: s2pu1

Solvent: CDCl3

Ambient temperature

INOVA-300 "sunotmr"

PULSE SEQUENCE

Relax. delay 1.000 sec

Pulse 42.6 degrees

Acq. time 0.599 sec

Width 16501.7 Hz

28592 repetitions

OBSERVE C13, 75.4160974 MHz

DECOUPLE H1, 299.9385198 MHz

Power 32 dB

continuously on

VALT2-16 modulated

DATA PROCESSING

Line broadening 1.0 Hz

FT size 32768

Total time 14 hr, 44 min, 25 sec

## Compound 23

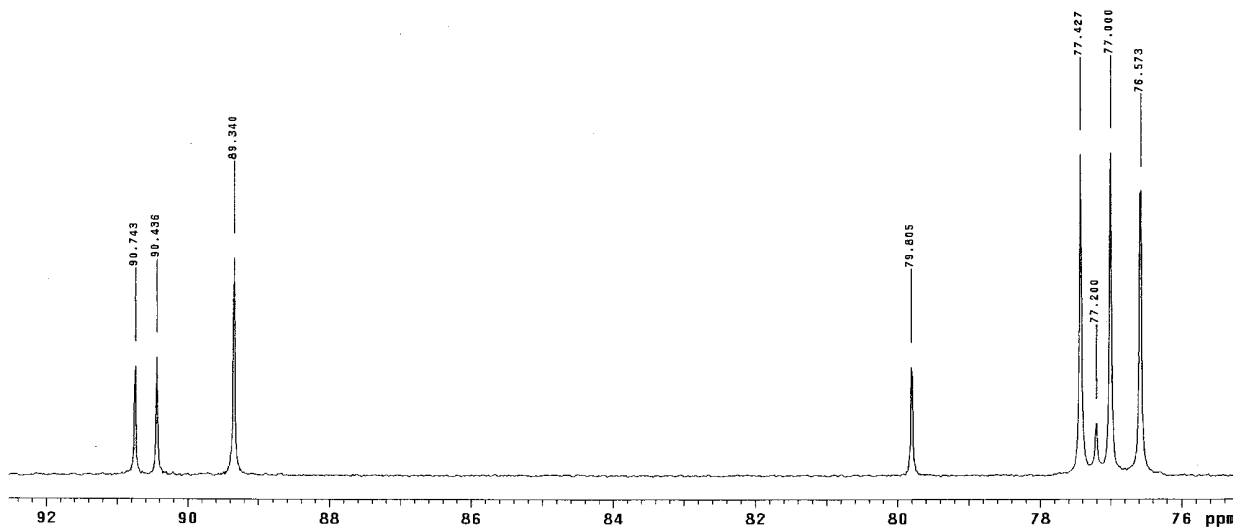

qli-269

Pulse Sequence: s2pu1

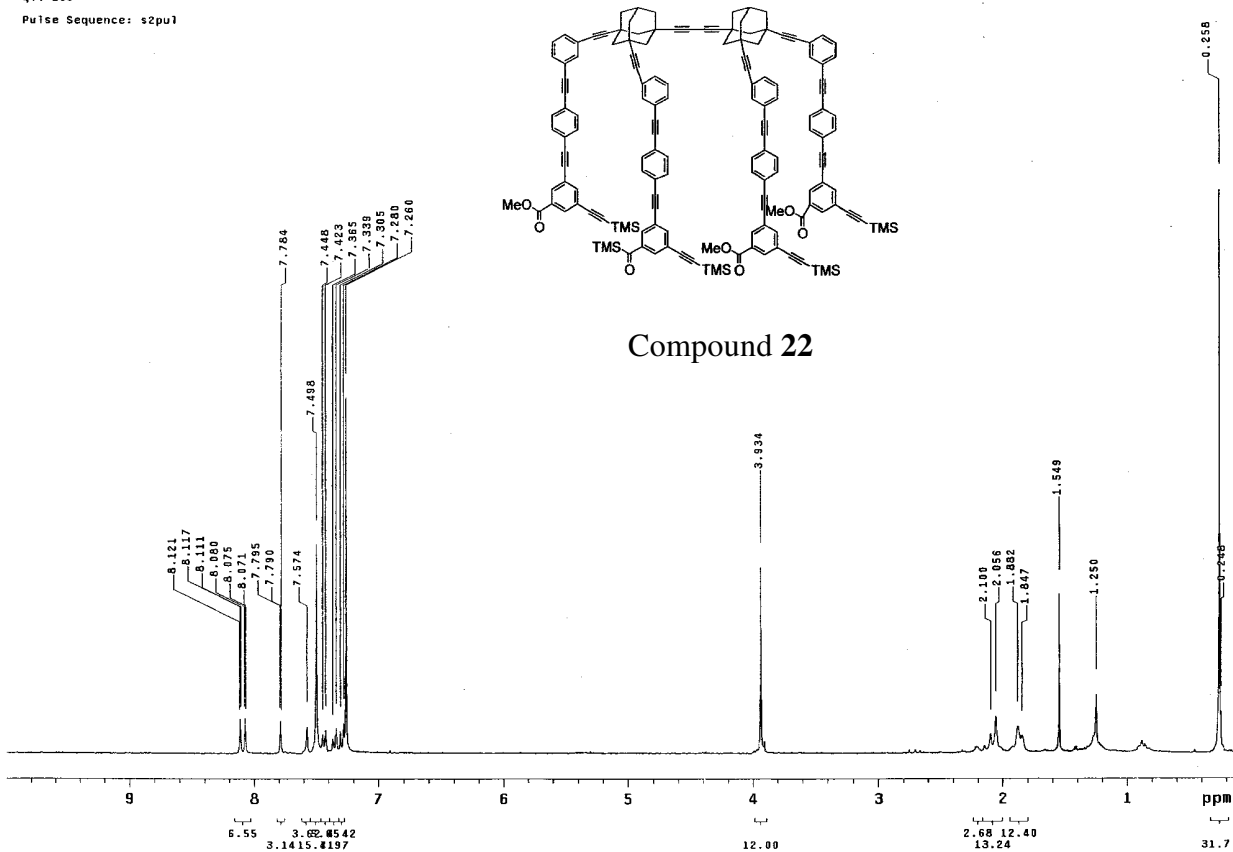

## Compound 22

# Compound 22

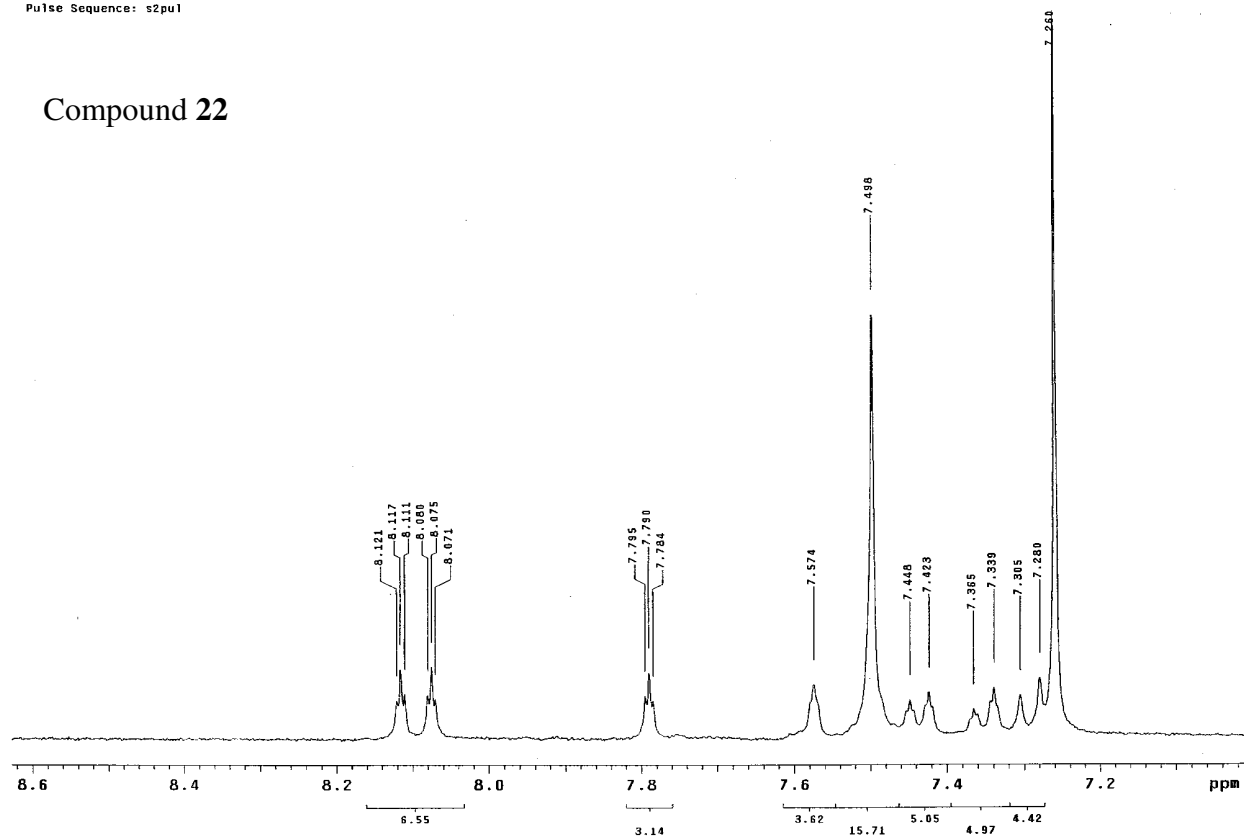

# Compound 22

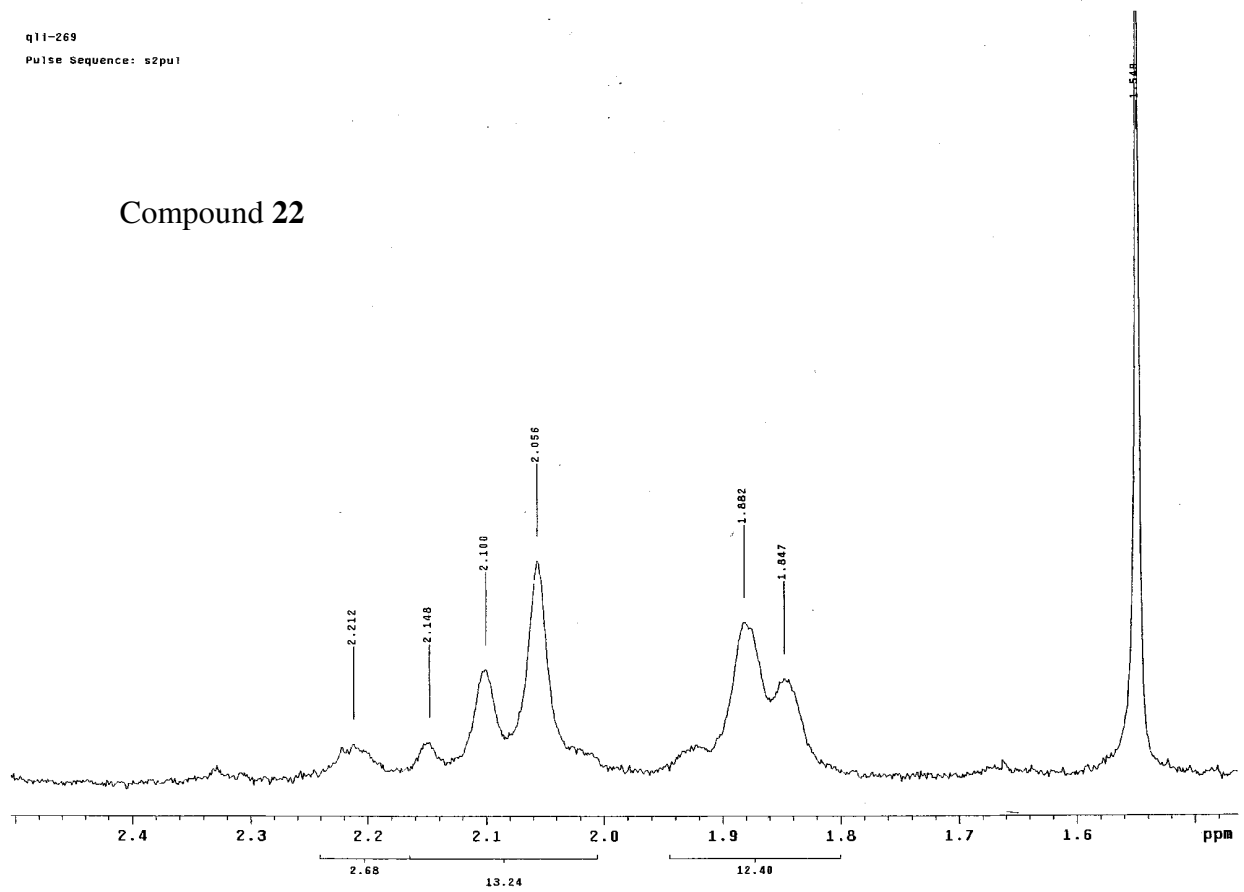

# Compound 22

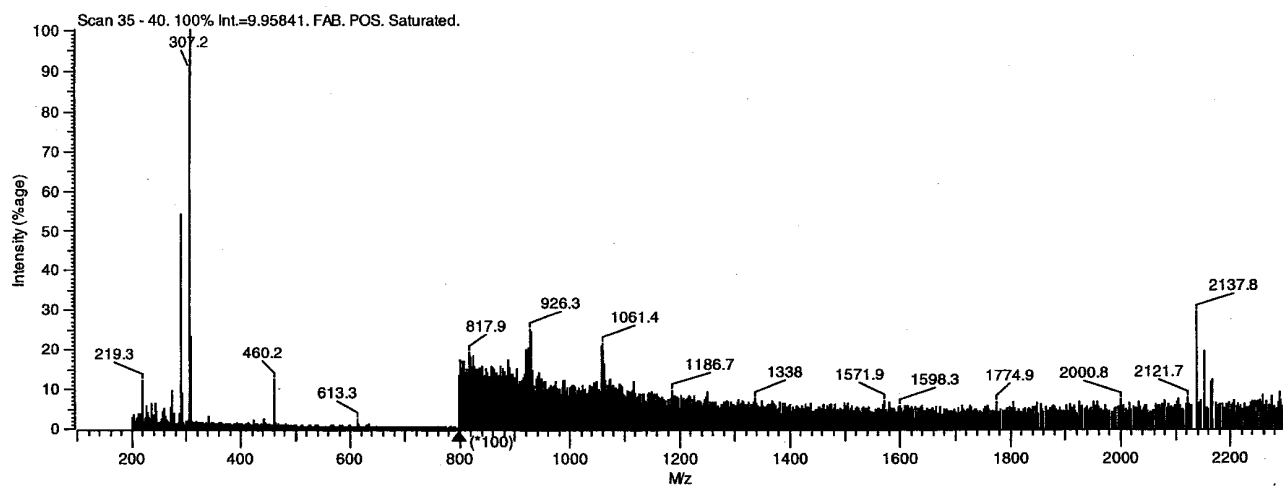

CJ-54Ac  
Pulse Sequence: s2pul

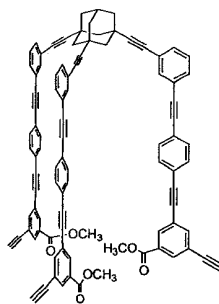

# Compound 24

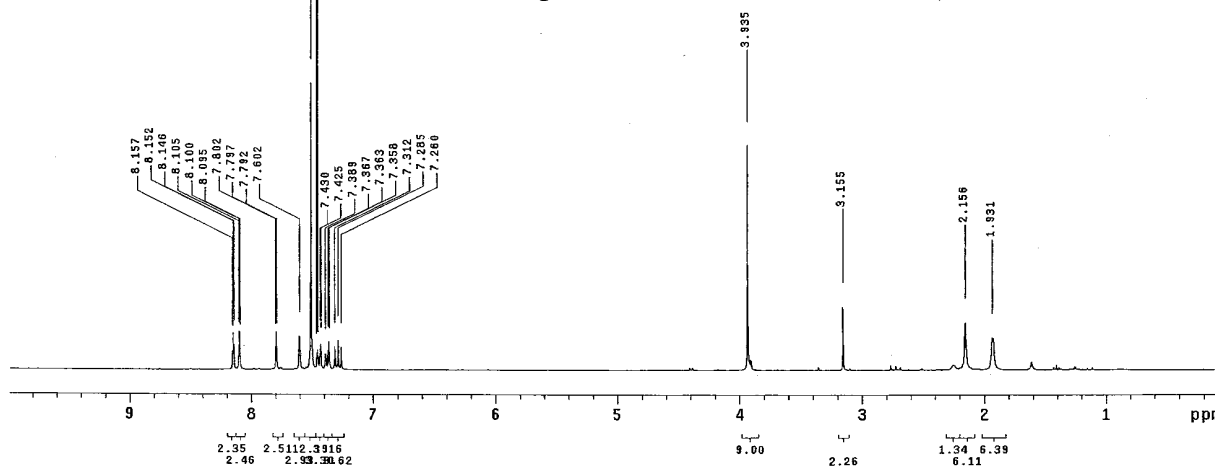

CJ-54Ac  
Pulse Sequence: s2pu1

Compound 24

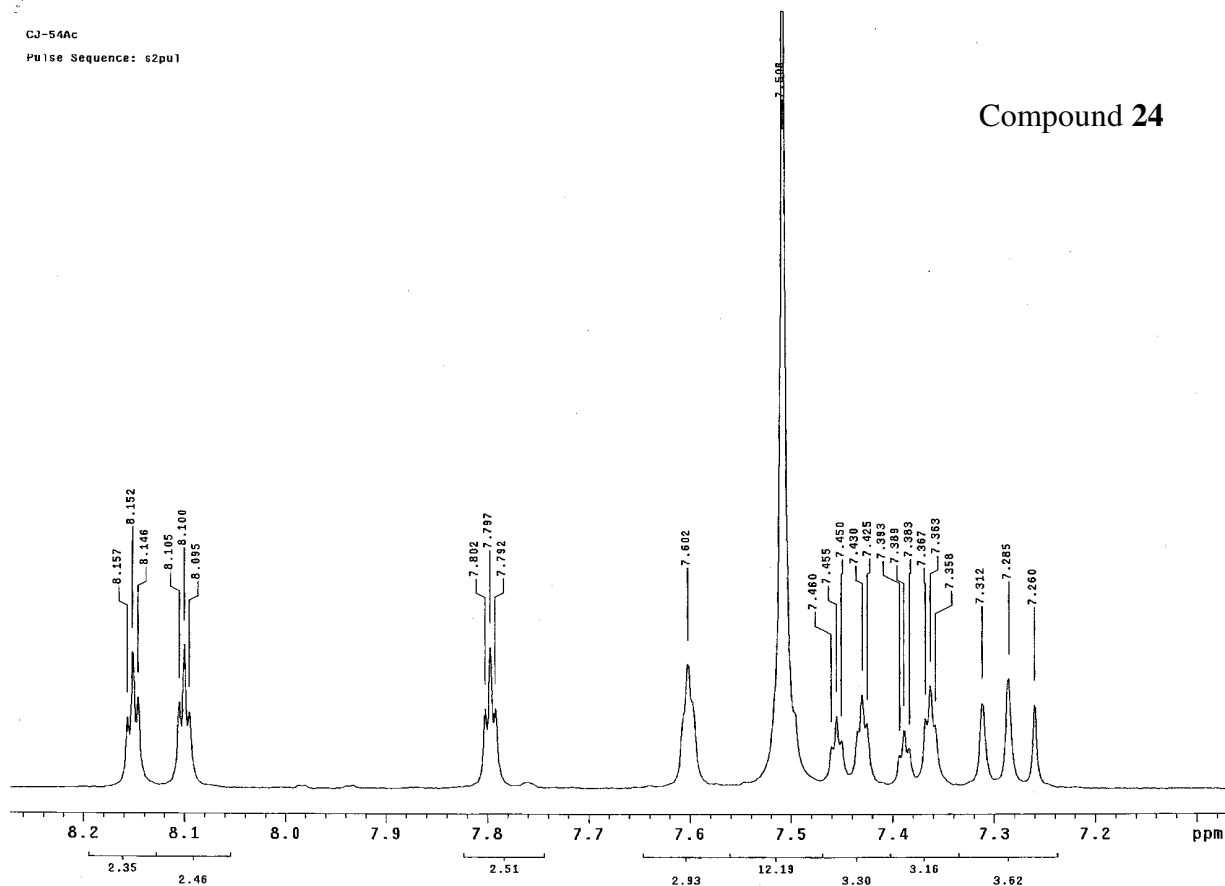

Compound 24

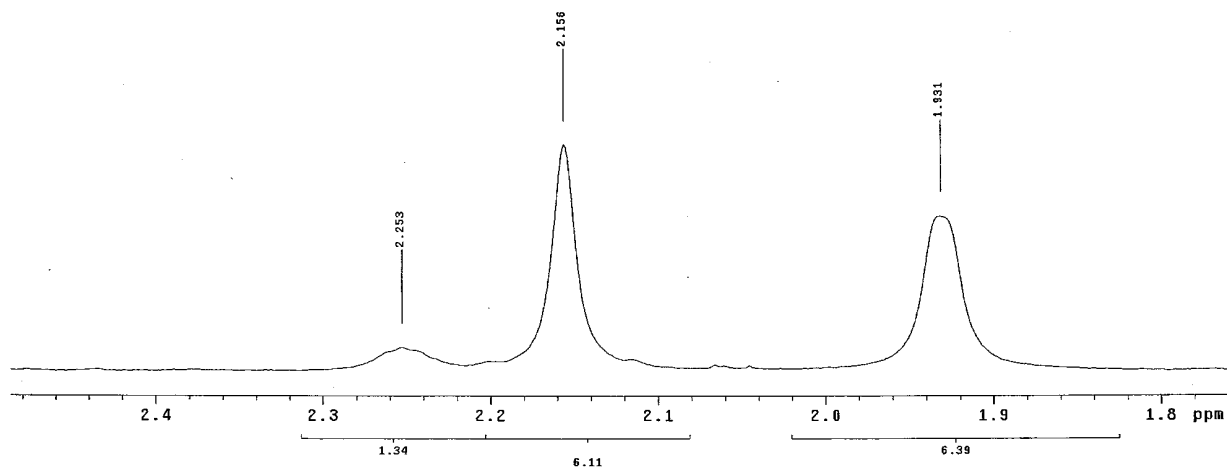

# Compound 24

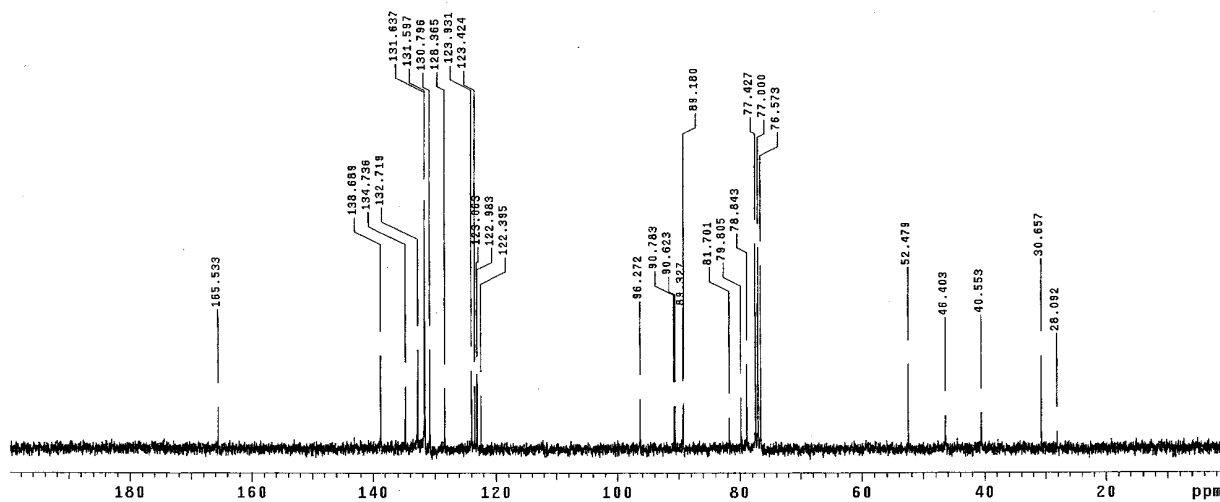

CJ-54Ac  
Pulse Sequence: s2pu1

# Compound 24

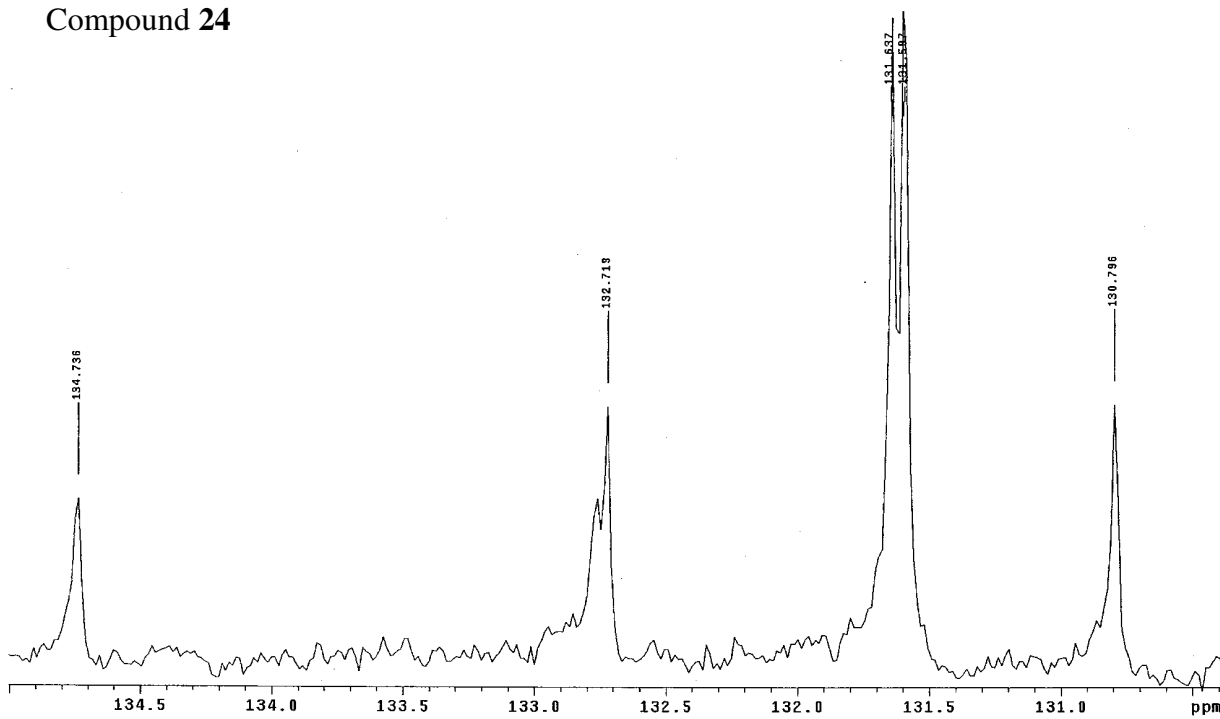

# Compound 24

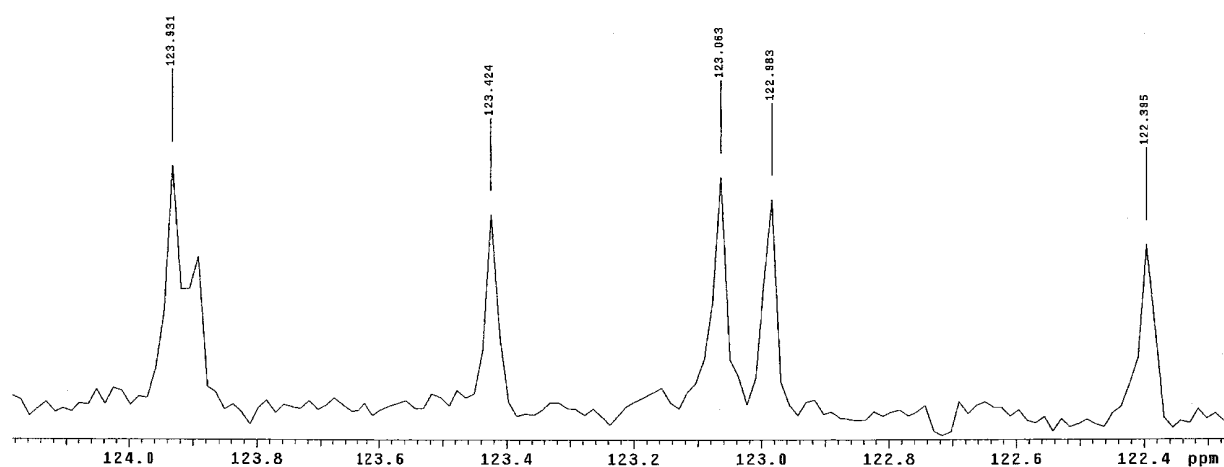

CJ-54Ac

Pulse Sequence: s2pu1

# Compound 24

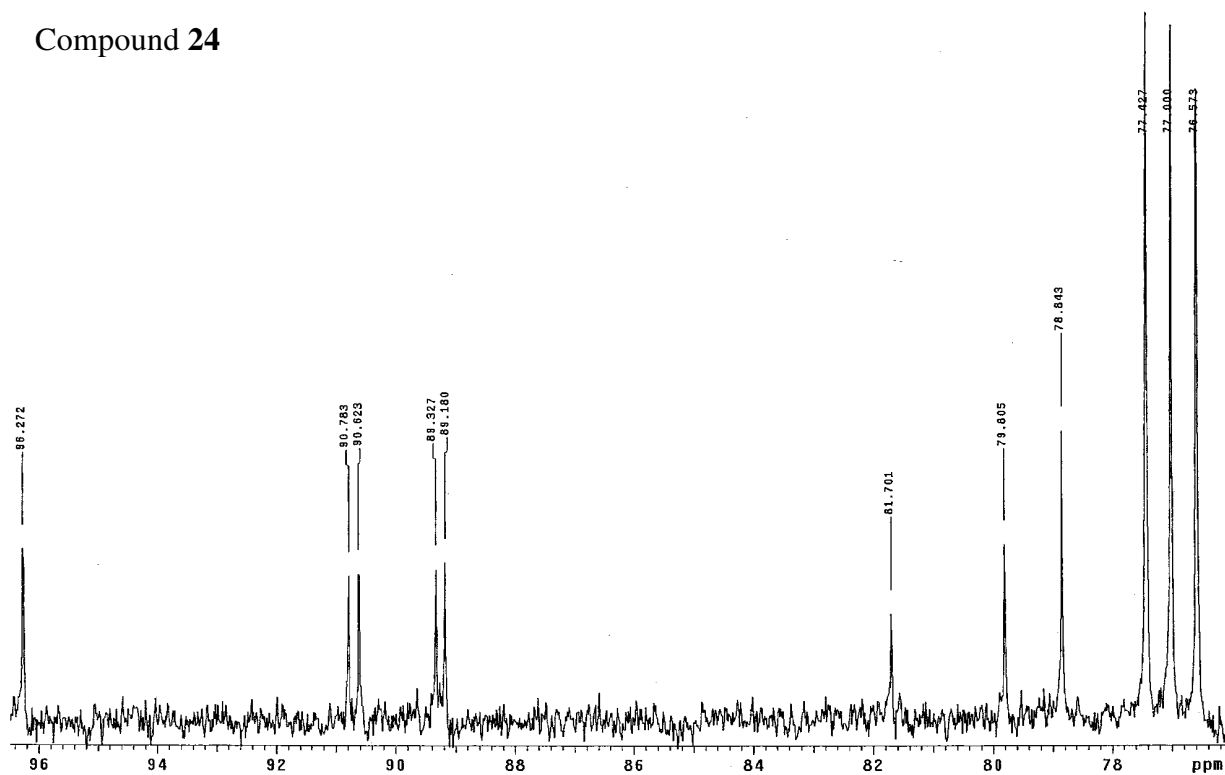



STANDARD 1H OBSERVE

Pulse Sequence: s2pul  
Solvent: DMSO  
Ambient temperature  
File: cj-74  
INOVA-300 "sunofnmr"  
PULSE SEQUENCE  
Relax. delay 1.000 sec  
Pulse 37.9 degrees  
Acq. time 2.501 sec  
Width 4799.0 Hz  
16 repetitions  
OBSERVE H1, 299.9339470 MHz  
DATA PROCESSING  
Line broadening 0.2 Hz  
FT size 32768  
Total time 0 min, 56 sec

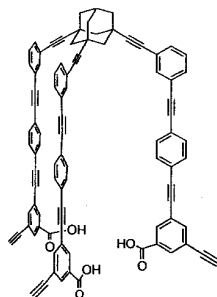

Compound 25

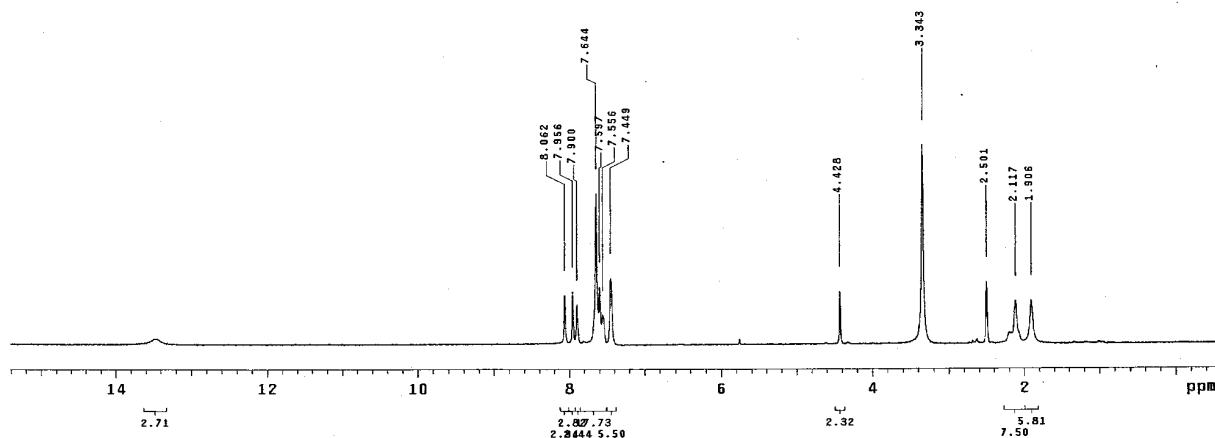

Mac-23

Pulse Sequence: s2pul  
Solvent: dms  
Temp. 25.0 C / 298.1 K  
User: 1-15-87  
File: QuanLi-Mac23-19C-500-28oct02  
INOVA-500 "acetone"  
PULSE SEQUENCE  
Relax. delay 7.000 sec  
Pulse 37.6 degrees  
Acq. time 0.549 sec  
Width 36303.0 Hz  
31712 repetitions  
OBSERVE C13, 125.7519684 MHz  
DECOUPLE H1, 500.1065879 MHz  
Power 46 dB  
on during acquisition  
off during delay  
waltz16 modulated  
DATA PROCESSING  
Line broadening 10.0 Hz  
FT size 65536  
Total time 104 hr, 52 min, 26 sec

Compound 25

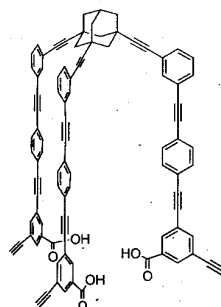

500 MHz

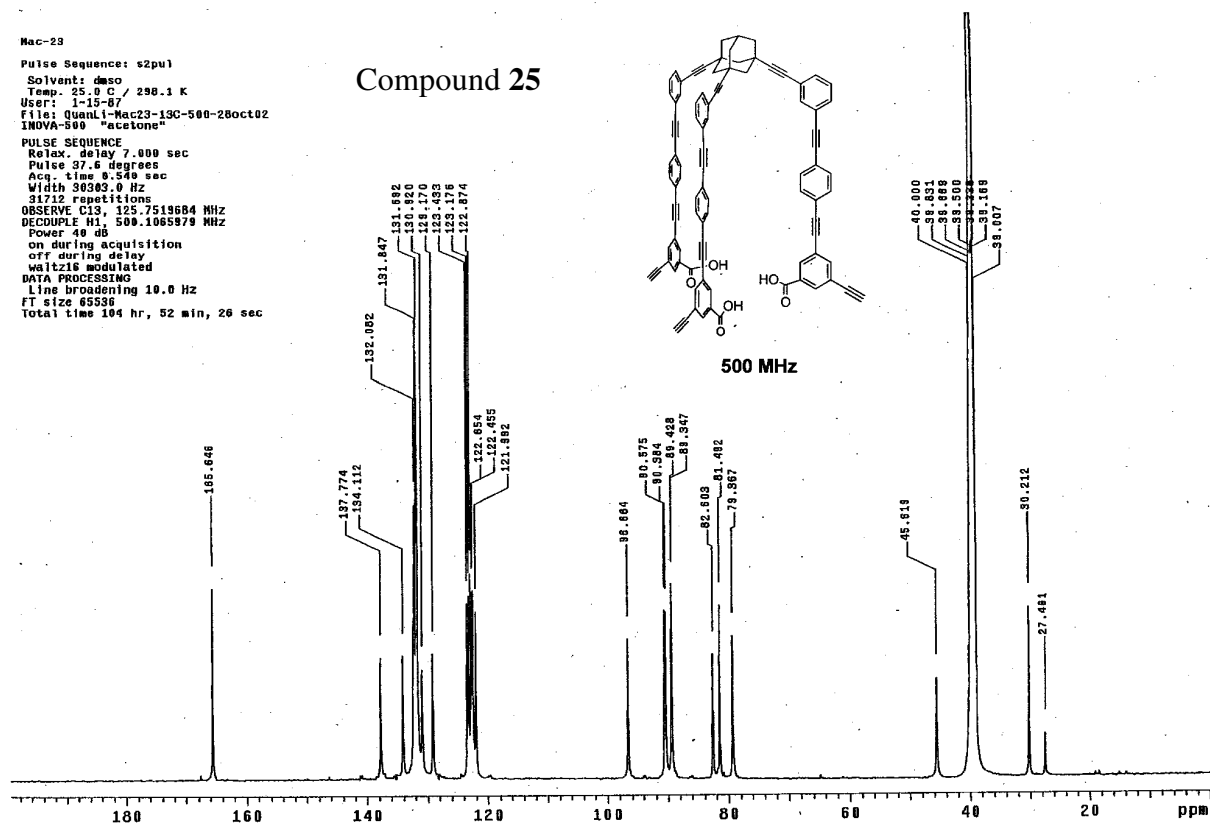

Mac-23  
Pulse Sequence: s2pul  
Solvent: dmsd  
Temp. 25.0 C / 298.1 K  
User: 1-15-87  
File: Quant-i-Mac23-13C-500-28oct02  
INOVA-500 "acetone"  
PULSE SEQUENCE  
Relax. delay 7.000 sec  
Pulse 37.6 degrees  
Acq. time 0.540 sec  
Width 30303.0 Hz  
31712 repetitions  
OBSERVE C13, 125.7519684 MHz  
DECOUPLE H1, 500.1065979 MHz  
Power 40 dB  
on during acquisition  
off during delay  
waltz16 modulated  
DATA PROCESSING  
Line broadening 10.0 Hz  
FT size 65536  
Total time 104 hr, 52 min, 26 sec

## Compound 25

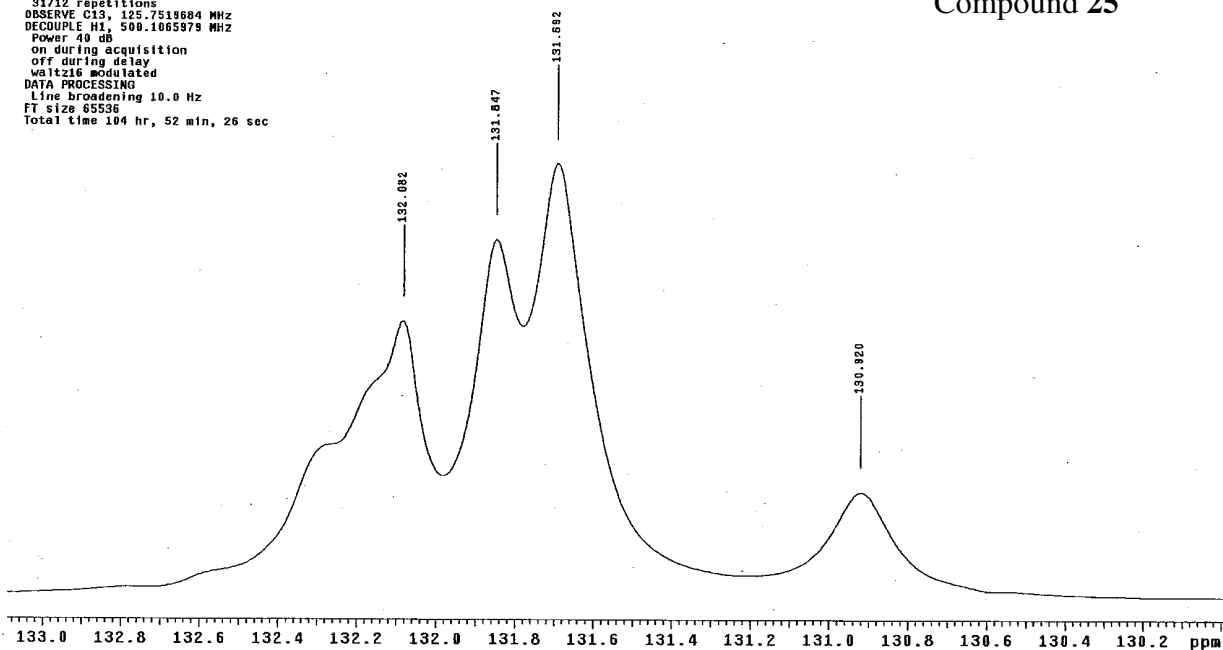

Mac-23  
Pulse Sequence: s2pul  
Solvent: dmsd  
Temp. 25.0 C / 298.1 K  
User: 1-15-87  
File: Quant-i-Mac23-13C-500-28oct02  
INOVA-500 "acetone"  
PULSE SEQUENCE  
Relax. delay 7.000 sec  
Pulse 37.6 degrees  
Acq. time 0.540 sec  
Width 30303.0 Hz  
31712 repetitions  
OBSERVE C13, 125.7519684 MHz  
DECOUPLE H1, 500.1065979 MHz  
Power 40 dB  
on during acquisition  
off during delay  
waltz16 modulated  
DATA PROCESSING  
Line broadening 10.0 Hz  
FT size 65536  
Total time 104 hr, 52 min, 26 sec

## Compound 25

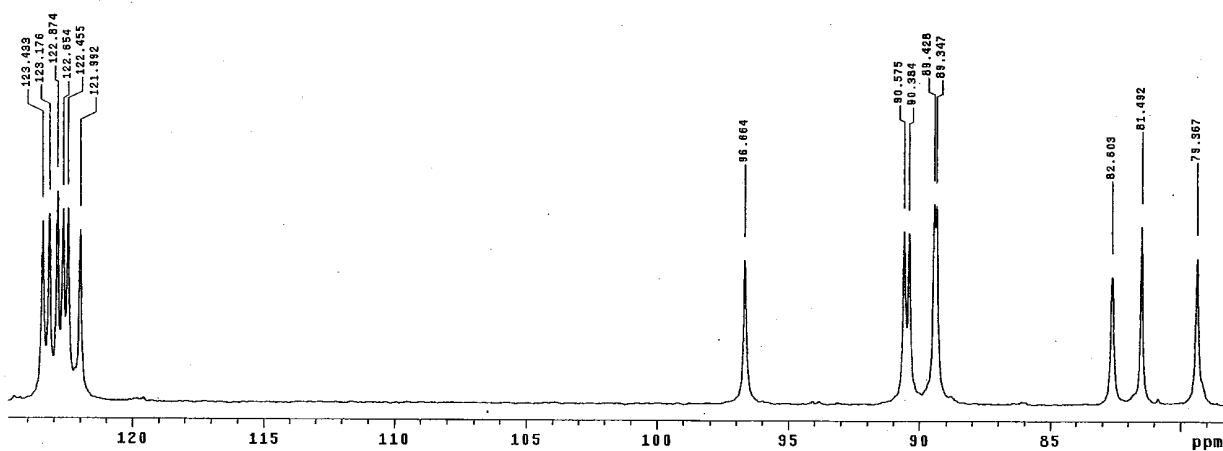

quant11-239  
Pulse Sequence: s2pu1

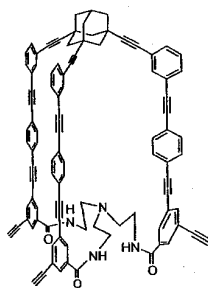

500 MHz

Compound 26

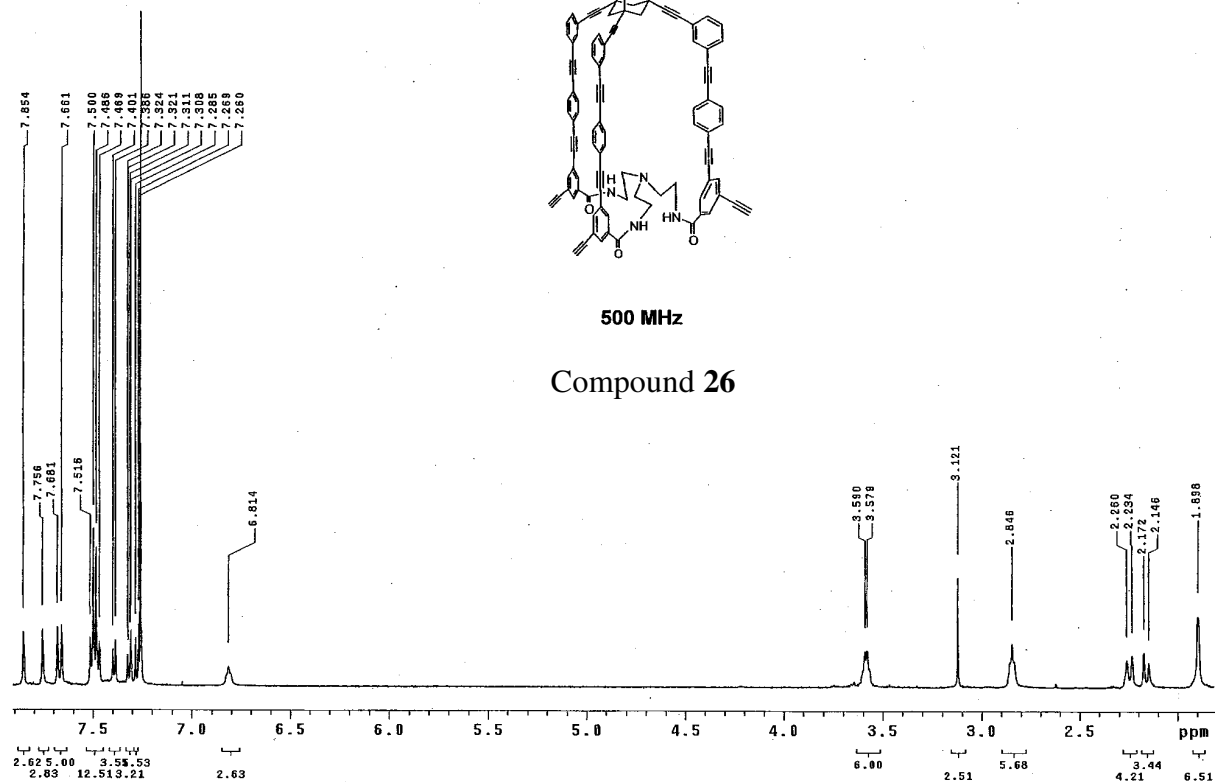

quant11-239  
Pulse Sequence: s2pu1

Compound 26

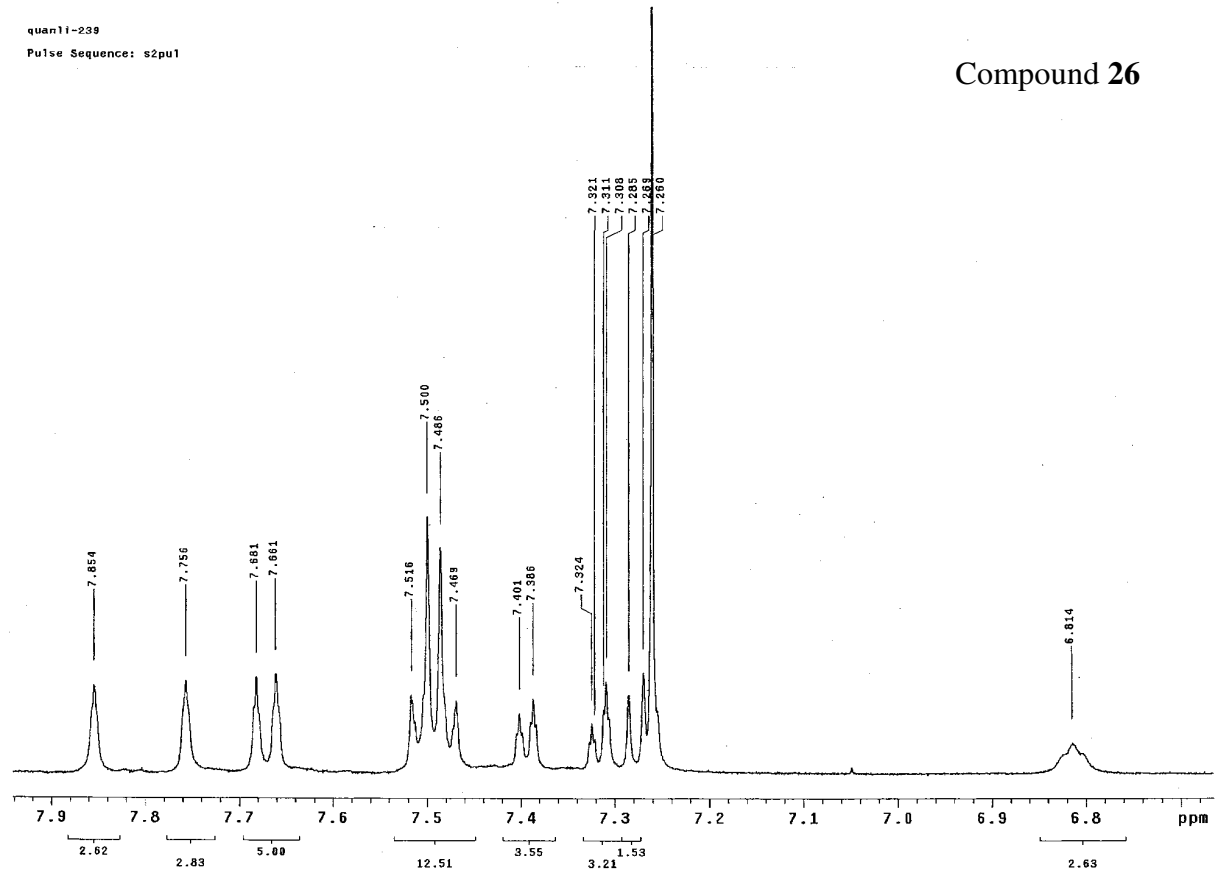

DBG-5mm 13C  
QLI-239  
CDC13  
Pulse Sequence: s2pu1

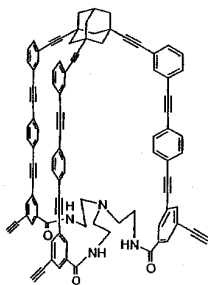

Compound 26

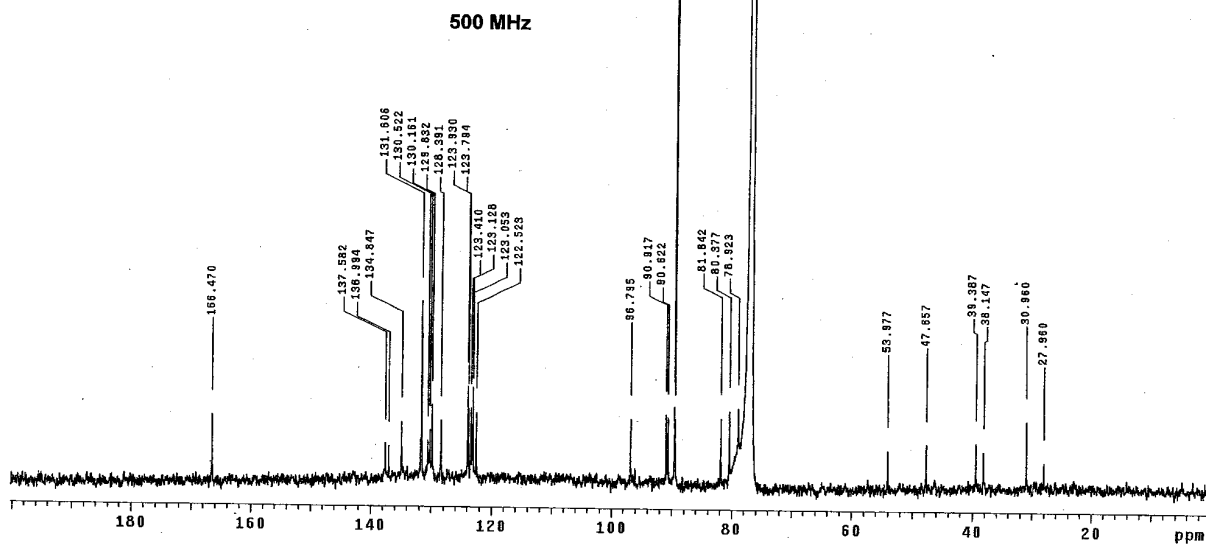

DBG-5mm 13C  
QLI-239  
CDC13  
Pulse Sequence: s2pu1

Compound 26

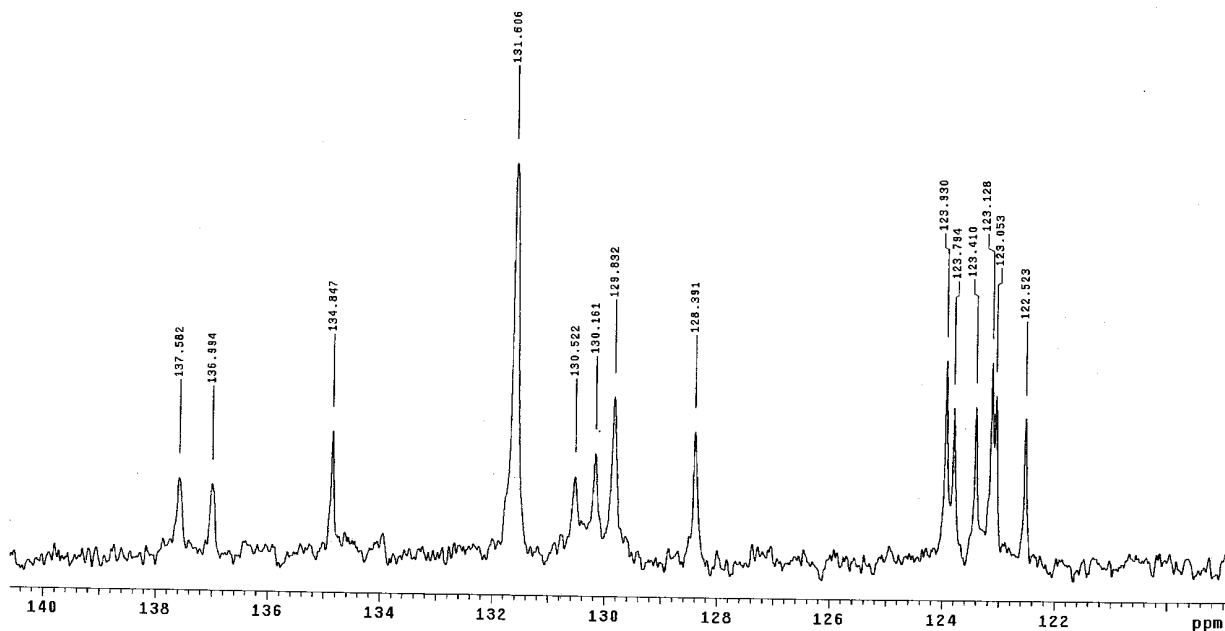

DBG-5mm 13C  
QL1-239  
CDC13  
Pulse Sequence: s2pu1

# Compound 26

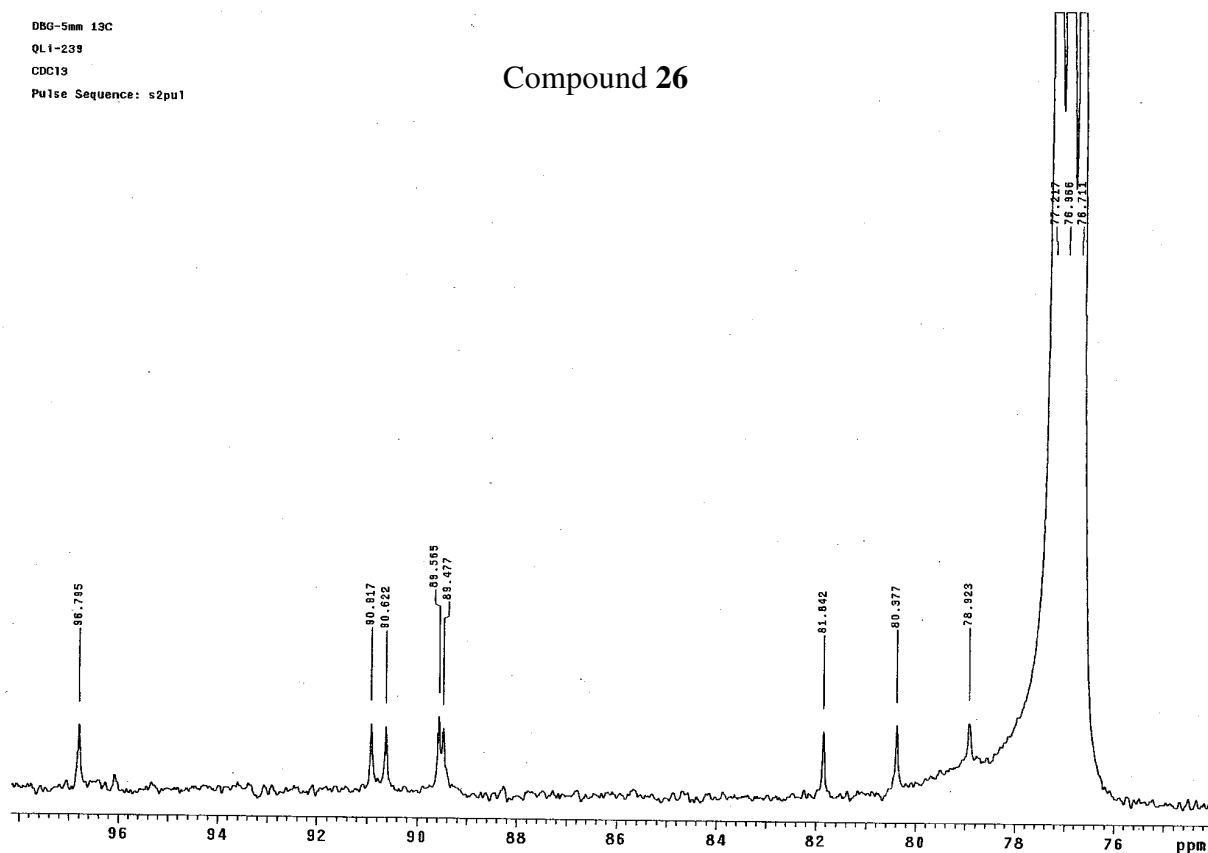

q11-239-300mhz  
Pulse Sequence: s2pu1  
Solvent: CDC13  
Ambient temperature  
File: quan11020612b  
INOVA-300 "sunofnar.uoregon.edu"  
PULSE SEQUENCE  
Relax. delay 1.088 sec  
Pulse 42.5 degrees  
Acq. time 0.559 sec  
Width 16501.7 Hz  
25232 repetitions  
OBSERVE C13, 75.4216391 MHz  
DECOUPLE H1, 299.9476514 MHz  
Power 32 dB  
continuously on  
WALTZ-16 modulated  
DATA PROCESSING  
Line broadening 1.0 Hz  
FT size 32768  
Total time 13 hr, 24 min, 1 sec

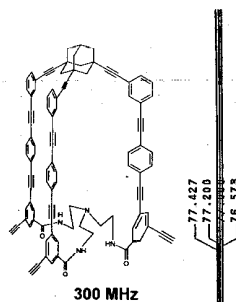

# Compound 26

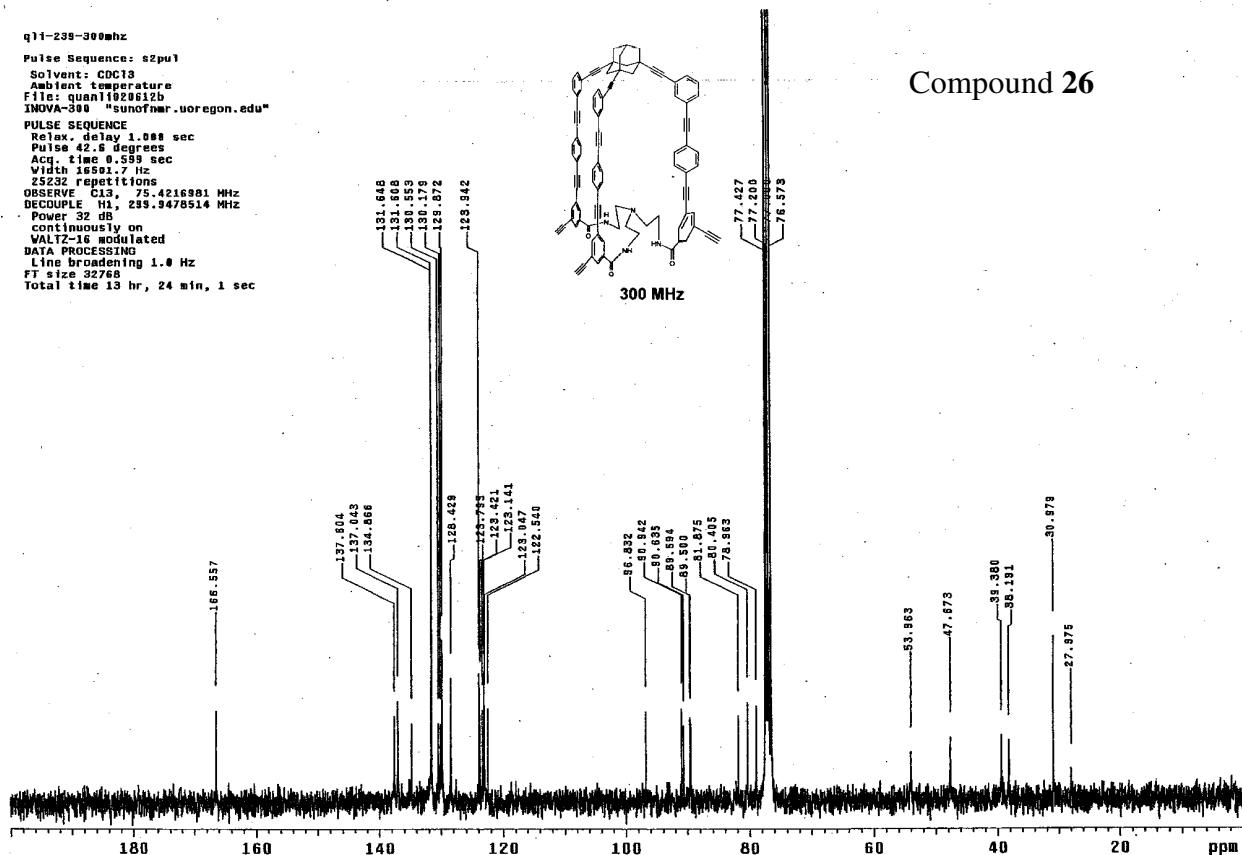

q11-239-300mhz  
Pulse Sequence: s2pul  
Solvent: CDCl3  
Ambient temperature  
File: quan11020612b  
INOVA-300 "sunofnmr.uoregon.edu"  
PULSE SEQUENCE  
Relax. delay 1.000 sec  
Pulse 42.6 degrees  
Acq. time 0.599 sec  
Width 16581.7 Hz  
25232 repetitions  
OBSERVE C13, 75.4216981 MHz  
DECOUPLE H1, 299.9478514 MHz  
Power 32 dB  
continuously on  
WALTZ-16 modulated  
DATA PROCESSING  
Line broadening 1.0 Hz  
FT size 32768  
Total time 13 hr, 24 min, 1 sec

## Compound 26

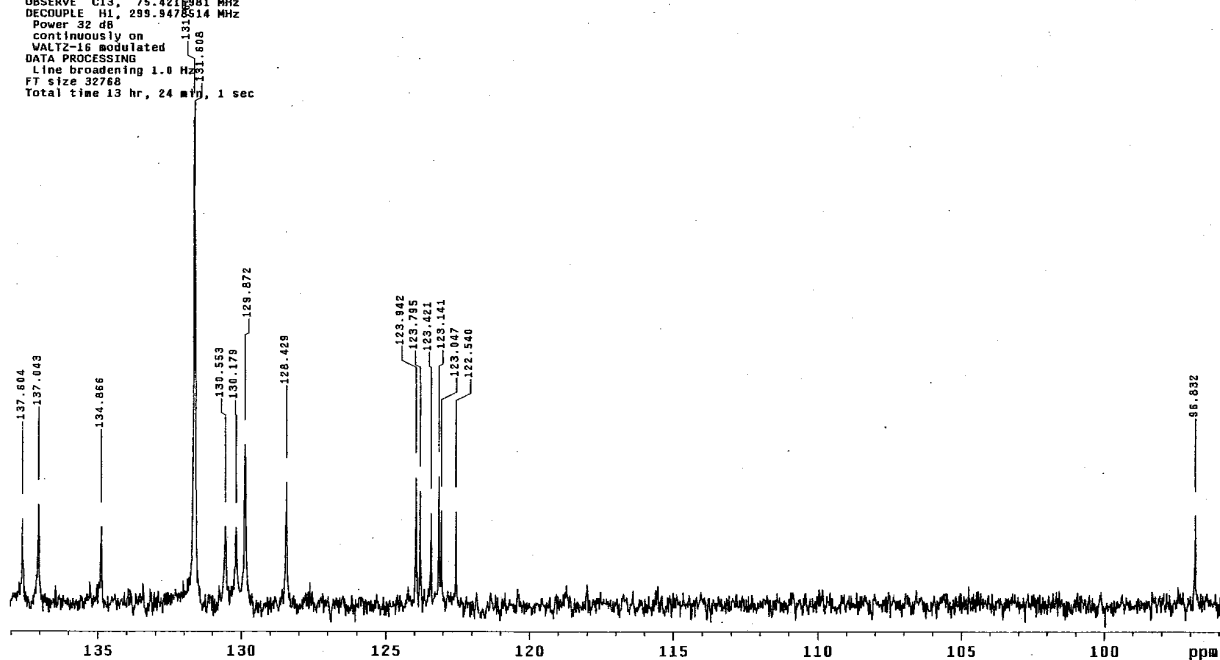

q11-239-300mhz  
Pulse Sequence: s2pul  
Solvent: CDCl3  
Ambient temperature  
File: quan11020612b  
INOVA-300 "sunofnmr.uoregon.edu"  
PULSE SEQUENCE  
Relax. delay 1.000 sec  
Pulse 42.6 degrees  
Acq. time 0.599 sec  
Width 16581.7 Hz  
25232 repetitions  
OBSERVE C13, 75.4216981 MHz  
DECOUPLE H1, 299.9478514 MHz  
Power 32 dB  
continuously on  
WALTZ-16 modulated  
DATA PROCESSING  
Line broadening 1.0 Hz  
FT size 32768  
Total time 13 hr, 24 min, 1 sec

## Compound 26

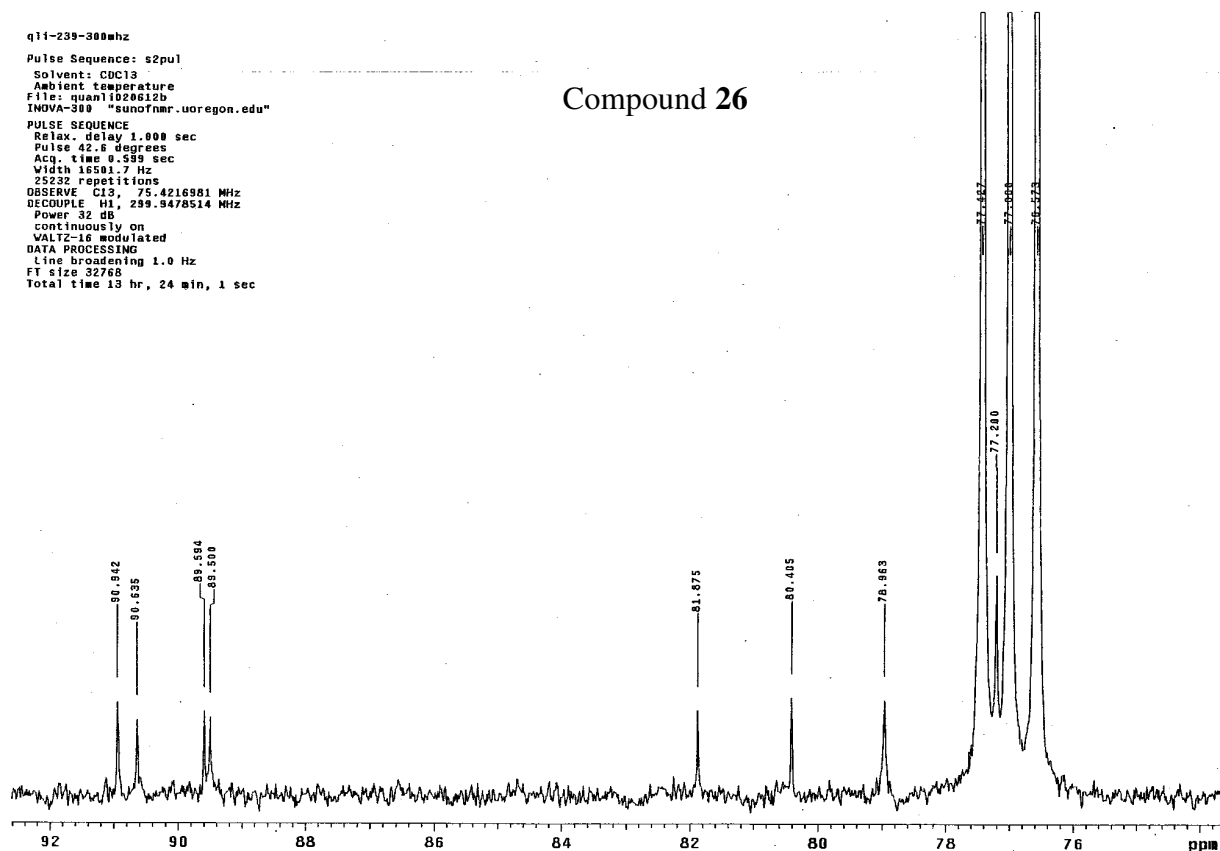

DBQ-5mm  
gCOSY  
QLI-239  
CDC13

expt1 gcosy

SAMPLE DEC. & VT  
date Feb 25 2003 dn H1  
solvent cdc13 dof 0  
file /user4/people- dm nnn  
/quant1/vnmrdata/5- dm c  
00/QLI-239-1H-500H- dmf 200  
Hz-gCOSY-25Feb03-f- hcmo n  
id temp 25.0

ACQUISITION  
sfrq 500.106 lp 4.4  
tn H1 rp 105.3  
at 0.465 rp1 0  
np 4096 lp1 0  
sw 4400.2 PROCESSING 0.50  
fb 2000 lb sb 0.075  
ss 2 sb not used  
tpwr 57 sbs ft  
pw 9.5 proc ft  
p1 11.1 fn 8192  
d1 1.000 math i  
tor -408.9  
nt 4 werr  
ct 4 wexp  
atock n wbs  
gain 56 wnt  
FLAGS 2D PROCESSING  
il n lb1 0.50  
in n sb1 0.050  
dp y sb1 not used  
hs nn proc1 ft  
2D ACQUISITION fnl 4096  
sw1 4400.2 DISPLAY  
nl 512 sp 875.2  
d2 0 wp 3263.3  
GRADIENTS vs 458  
gzlv11 3000 sc 0  
gt1 0.001900 wc 125  
grise 0.000100 hzmm 35.20  
gstab 0 is 83444.50  
qlv1 1.0 rfi 115.5  
2D DISPLAY rfp 0  
sp1 381.9 th 4  
wp1 3205.0 ins 1.000  
sc2 0 at av  
wc2 125  
rf11 115.5  
rfp1 0

## Compound 26

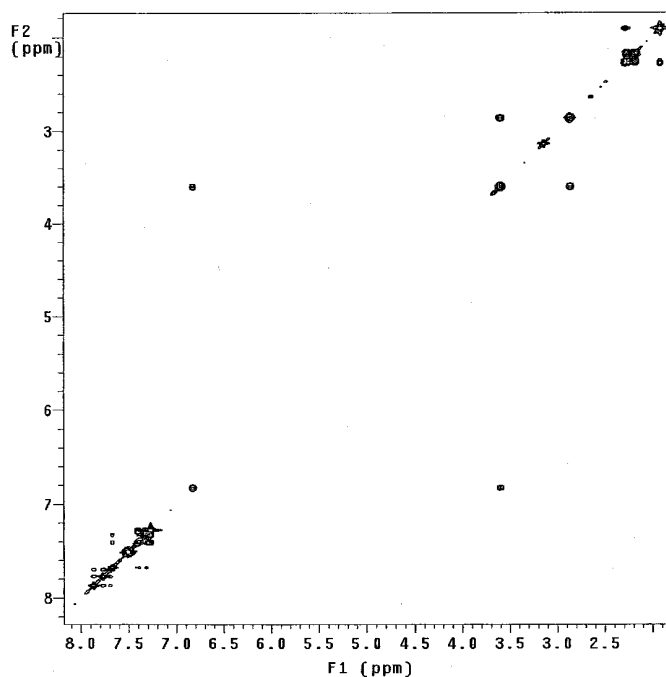

## Compound 26

Sample:QLI-239  
Quan Li

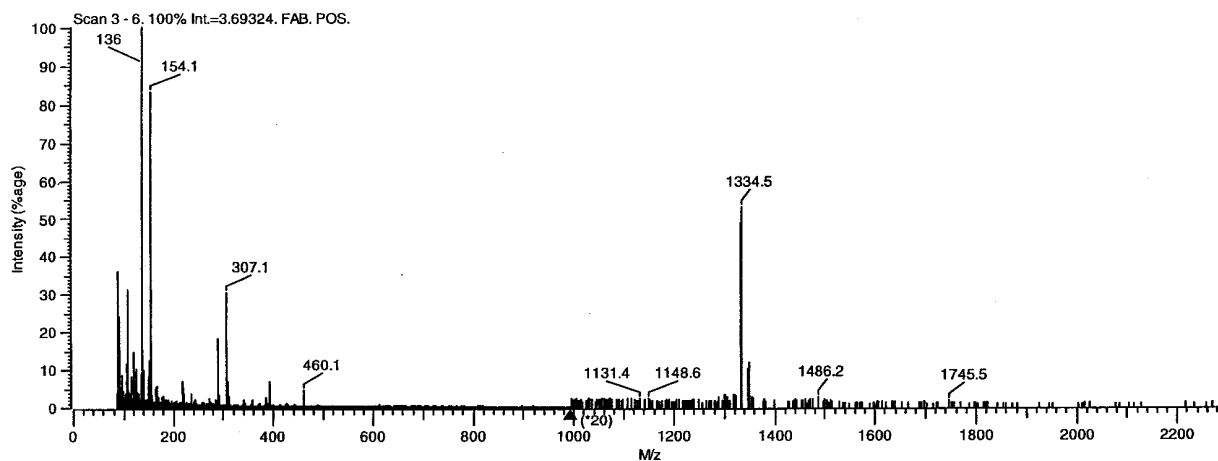

Changshu020918Aa  
Pulse Sequence: s2pul  
Solvent: CDC13  
Ambient temperature  
File: changshu020918Aa  
INOVA-500 "acetone"  
PULSE SEQUENCE  
Relax. delay 1.000 sec  
Pulse 37.9 degrees  
Acq. time 2.500 sec  
Width 4799.0 Hz  
8 repetitions  
OBSERVE H1, 299.9468689 MHz  
DATA PROCESSING  
Line broadening 0.2 Hz  
FT size 32768  
Total time 0 min, 28 sec

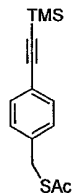

Compound 27

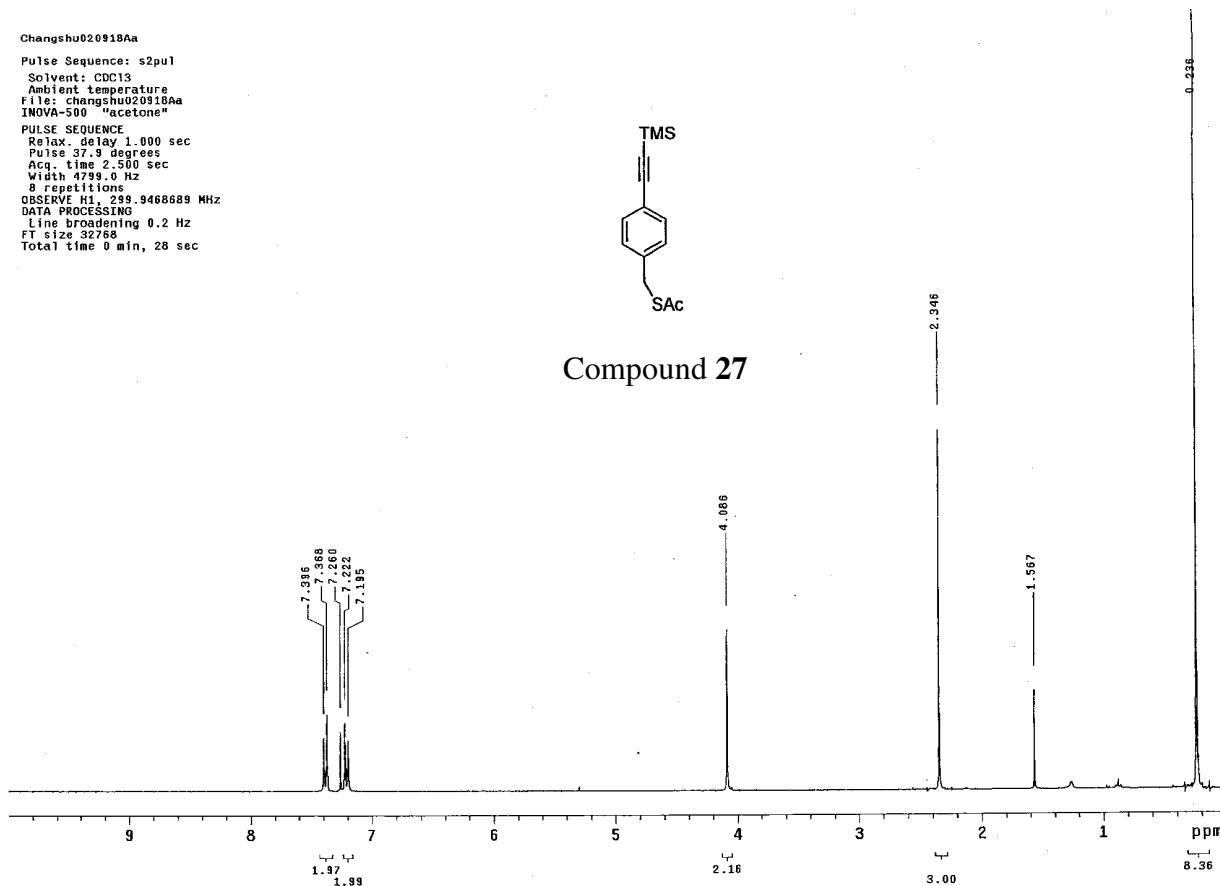

changshu020918Ab  
Pulse Sequence: s2pul  
Solvent: CDC13  
Ambient temperature  
File: changshu020918Ab  
INOVA-500 "acetone"  
PULSE SEQUENCE  
Relax. delay 1.000 sec  
Pulse 42.6 degrees  
Acq. time 0.599 sec  
Width 16501.7 Hz  
400 repetitions  
OBSERVE C13, 75.4216995 MHz  
DECOUPLE H1, 299.9478455 MHz  
Power 32 dB  
continuously on  
WALTZ-16 modulated  
DATA PROCESSING  
Line broadening 1.0 Hz  
FT size 32768  
Total time 21 min, 28 sec

Compound 27

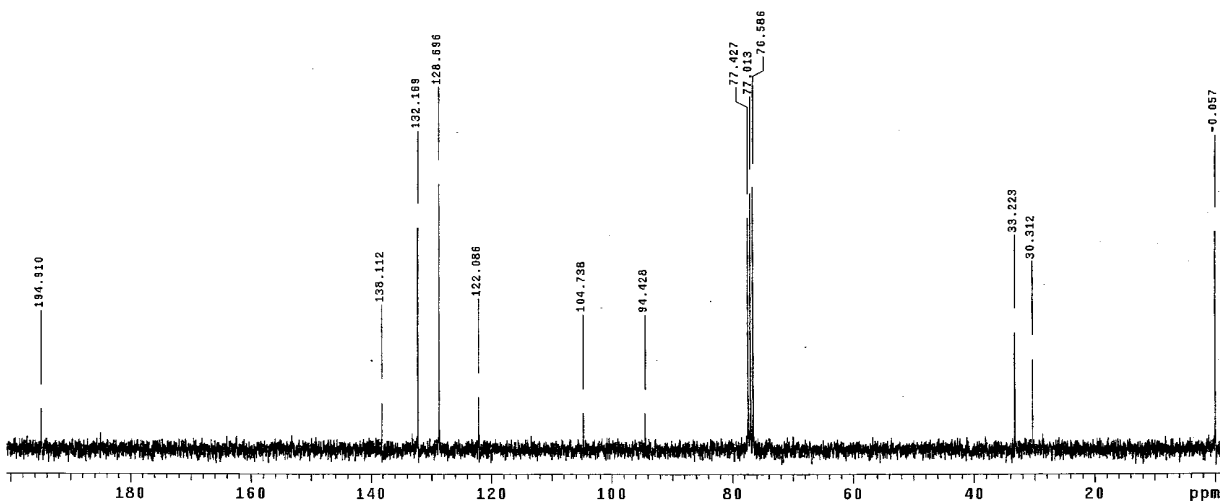



quan11020807c  
 Pulse Sequence: s2pu1  
 Solvent: CDCl3  
 Ambient temperature  
 INOVA-300 "sunofmr"  
 PULSE SEQUENCE  
 Relax. delay 1.000 sec  
 Pulse 37.9 degrees  
 Acq. time 2.501 sec  
 Width 4799.0 Hz  
 8 repetitions  
 OBSERVE H1, 299.9465583 MHz  
 DATA PROCESSING  
 Line broadening 0.2 Hz  
 FT size 32768  
 Total time 0 min, 28 sec

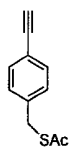

Compound 28

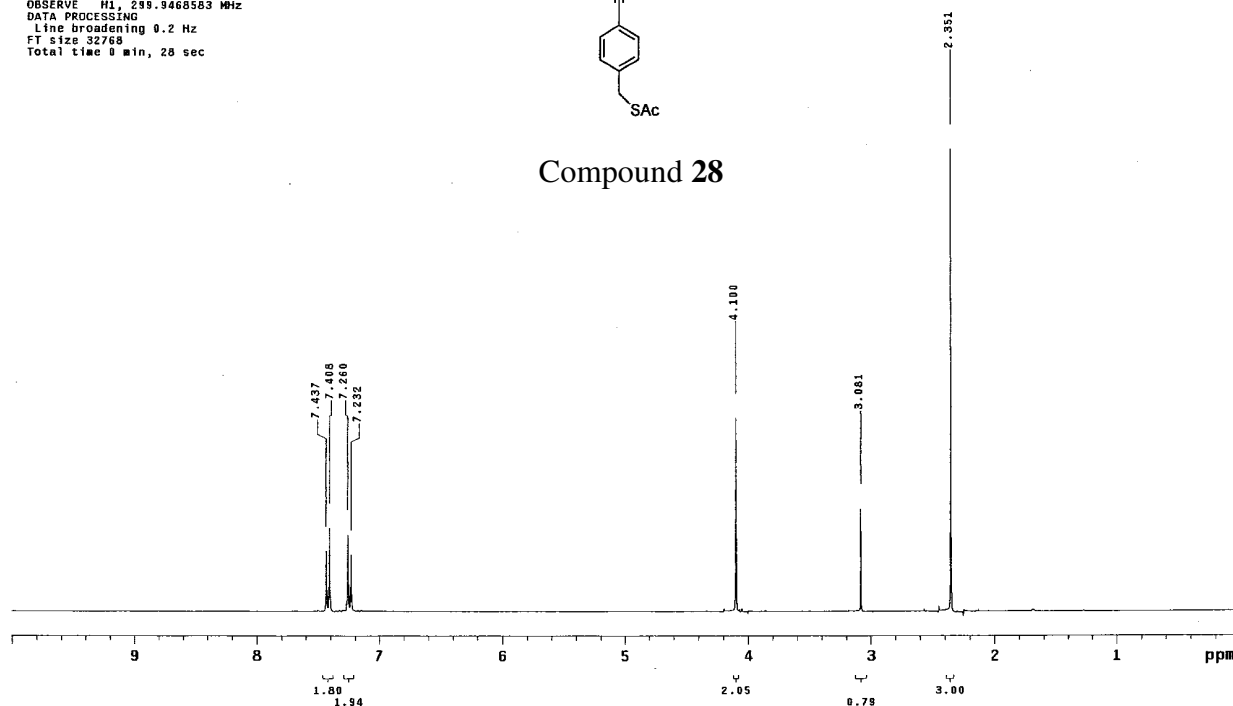

quan11020807d  
 Pulse Sequence: s2pu1  
 Solvent: CDCl3  
 Ambient temperature  
 INOVA-300 "sunofmr"  
 PULSE SEQUENCE  
 Relax. delay 1.000 sec  
 Pulse 42.6 degrees  
 Acq. time 0.593 sec  
 Width 16501.7 Hz  
 176 repetitions  
 OBSERVE C13, 75.4217041 MHz  
 DECOUPLE H1, 299.9478514 MHz  
 Power 32 dB  
 continuously on  
 WALTZ-16 modulated  
 DATA PROCESSING  
 Line broadening 1.0 Hz  
 FT size 32768  
 Total time 10 min, 43 sec

Compound 28

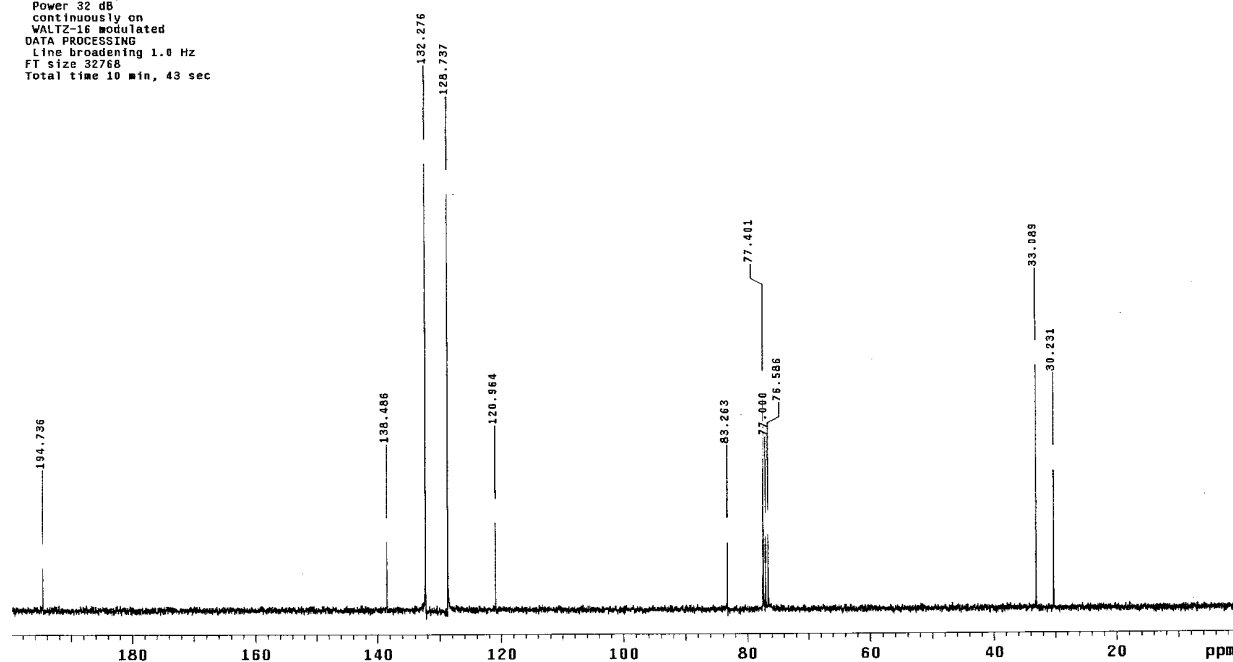

q11-215

Pulse Sequence: s2pu1  
Solvent: CDCl3  
Ambient temperature  
INOVA-300 "sunofmr"  
PULSE SEQUENCE  
Relax. delay 1.000 sec  
Pulse 37.9 degrees  
Acq. time 2.501 sec  
Width 4799.0 Hz  
8 repetitions  
OBSERVE H1, 299.9325201 MHz  
DATA PROCESSING  
Line broadening 0.2 Hz  
FT size 32768  
Total time 0 min, 28 sec

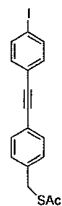

Compound 29

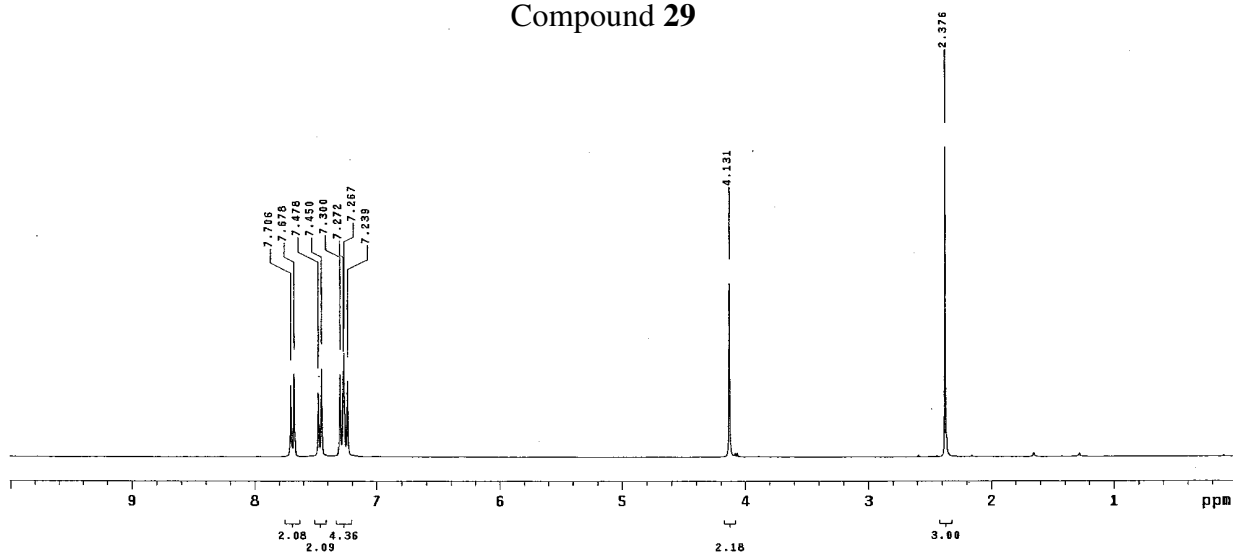

q11-215

Pulse Sequence: s2pu1  
Solvent: CDCl3  
Ambient temperature  
INOVA-300 "sunofmr"  
PULSE SEQUENCE  
Relax. delay 1.000 sec  
Pulse 37.9 degrees  
Acq. time 2.501 sec  
Width 4799.0 Hz  
8 repetitions  
OBSERVE H1, 299.9325201 MHz  
DATA PROCESSING  
Line broadening 0.2 Hz  
FT size 32768  
Total time 0 min, 28 sec

Compound 29

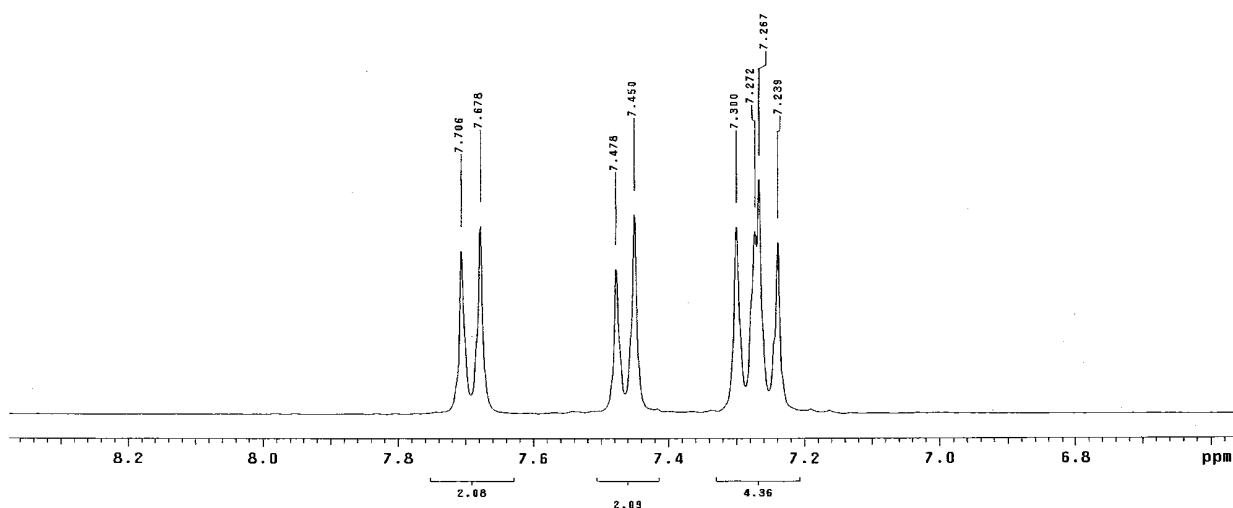

q11-215

Pulse Sequence: s2pul  
Solvent: CDCl3  
Ambient temperature  
INOVA-300 "sunofmr"  
PULSE SEQUENCE  
Relax. delay 1.000 sec  
Pulse 47.4 degrees  
Acq. time 0.599 sec  
Width 16501.7 Hz  
80 repetitions  
OBSERVE C13, 75.4181004 MHz  
DECOUPLE H1, 299.9335198 MHz  
Power 32 dB  
continuously on  
WALTZ-16 modulated  
DATA PROCESSING  
Line broadening 1.0 Hz  
FT size 32768  
Total time 16 min, 4 sec

## Compound 29

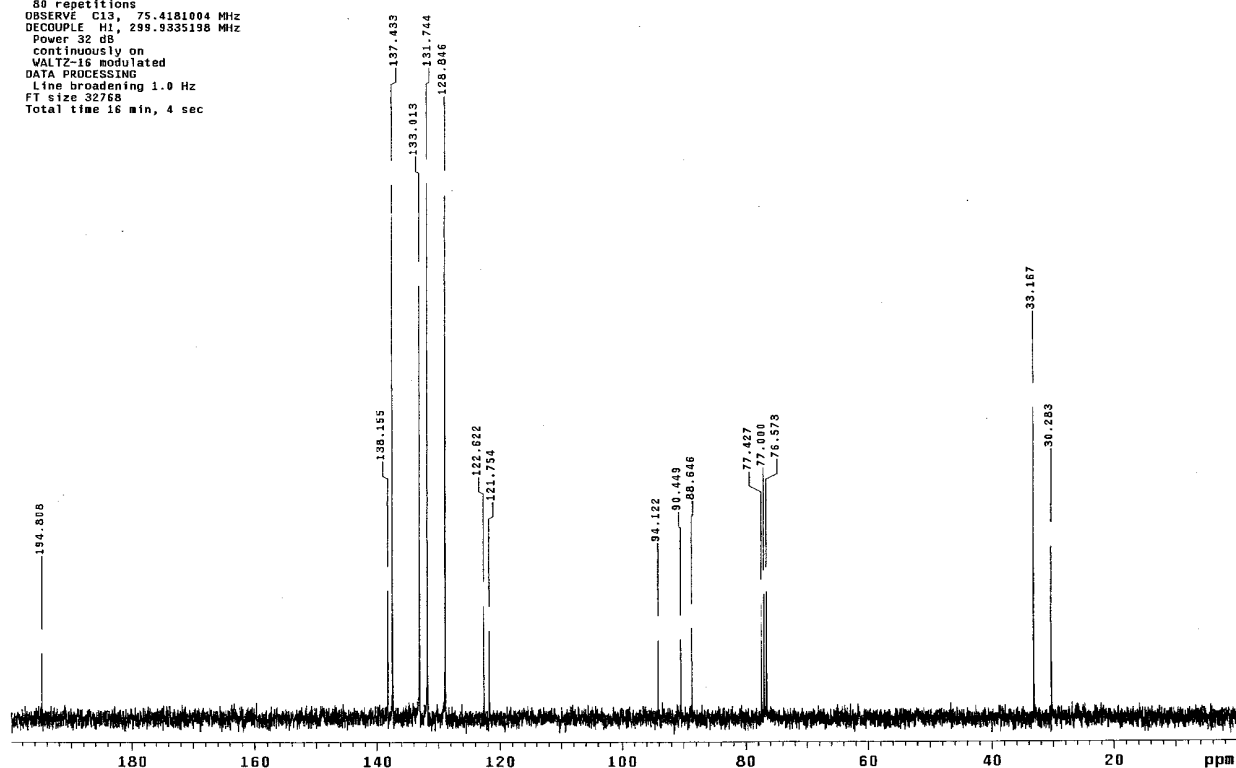

q11-254

Pulse Sequence: s2pul  
Solvent: cdc13  
Temp. 25.0 C / 298.1 K  
User: 1-15-87  
File: Quan-254-1H-500-01apr03  
INOVA-500 "acetone"  
PULSE SEQUENCE  
Relax. delay 1.000 sec  
Pulse 48.6 degrees  
Acq. time 2.941 sec  
Width 6999.7 Hz  
16 repetitions  
OBSERVE H1, 500.1042480 MHz  
DATA PROCESSING  
Line broadening 0.1 Hz  
FT size 131072  
Total time 0 min, 53 sec

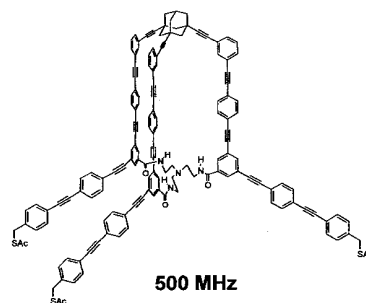

## Compound 30

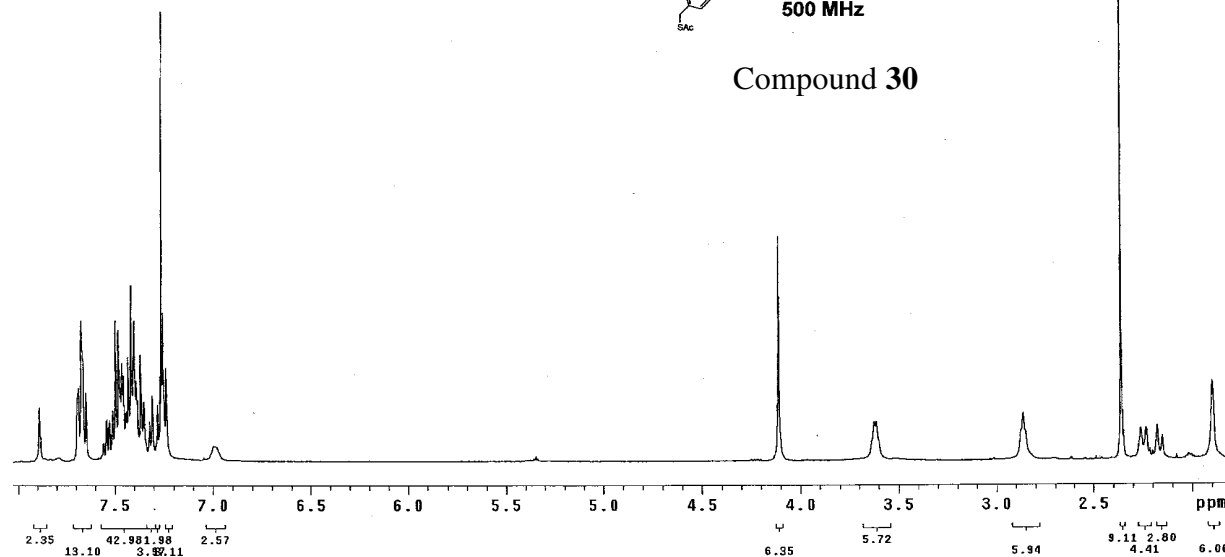

# Compound 30

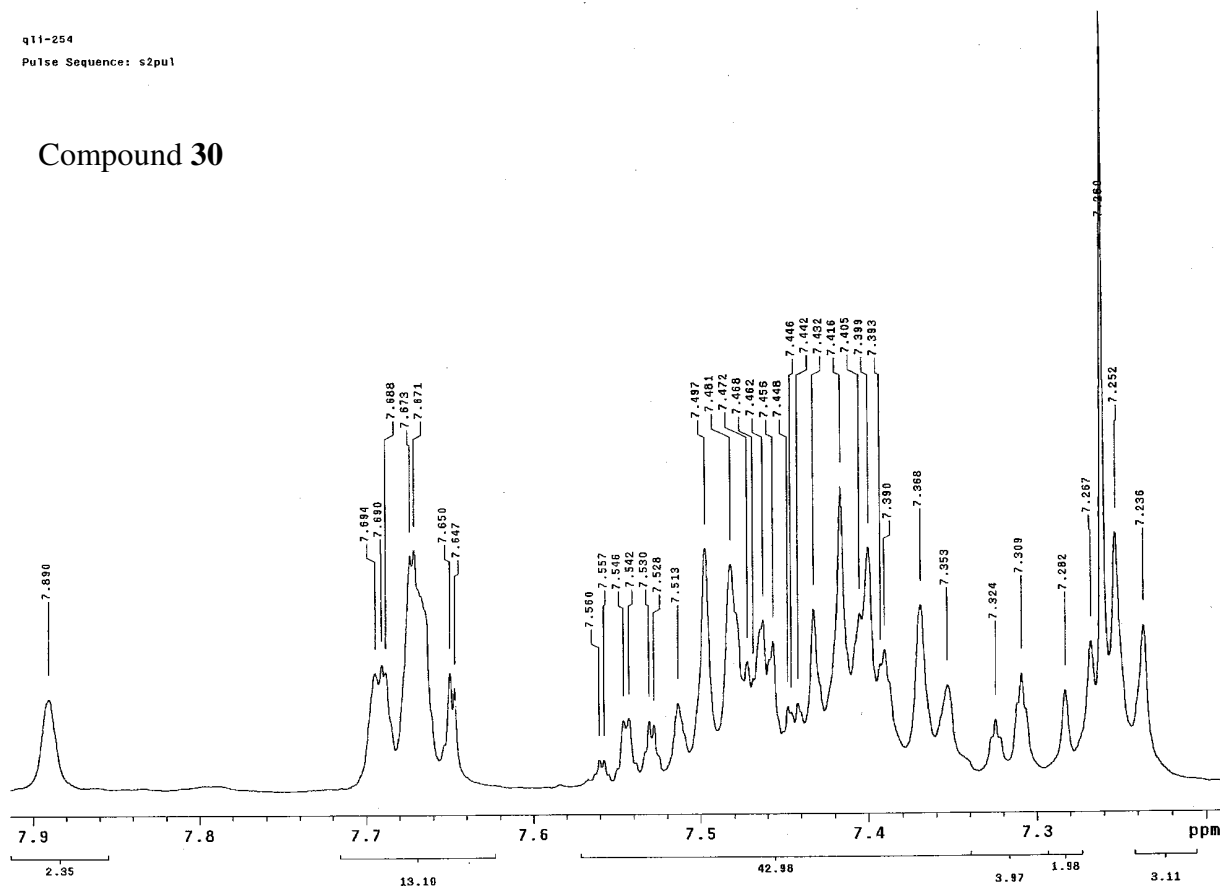

DBG-5mm 13C  
Quan-254  
CDCl3  
Pulse Sequence: s2pul  
Solvent: cdc13  
Temp. 25.0 C / 298.1 K  
User: 1-15-87  
File: Quan-254-13C-500-02apr03  
INOVA-500 "acetone"  
PULSE SEQUENCE  
Relax. delay 5.000 sec  
Pulse 37.6 degrees  
Acq. time 0.540 sec  
Width 28001.4 Hz  
11056 repetitions  
OBSERVE C13, 125.7513193 MHz  
DECOUPLE H1, 500.1042480 MHz  
Power 40 dB  
on during acquisition  
off during delay  
waltz16 modulated  
DATA PROCESSING  
Line broadening 5.0 Hz  
FT size 131072  
Total time 30 hr, 50 min, 18 sec

# Compound 30

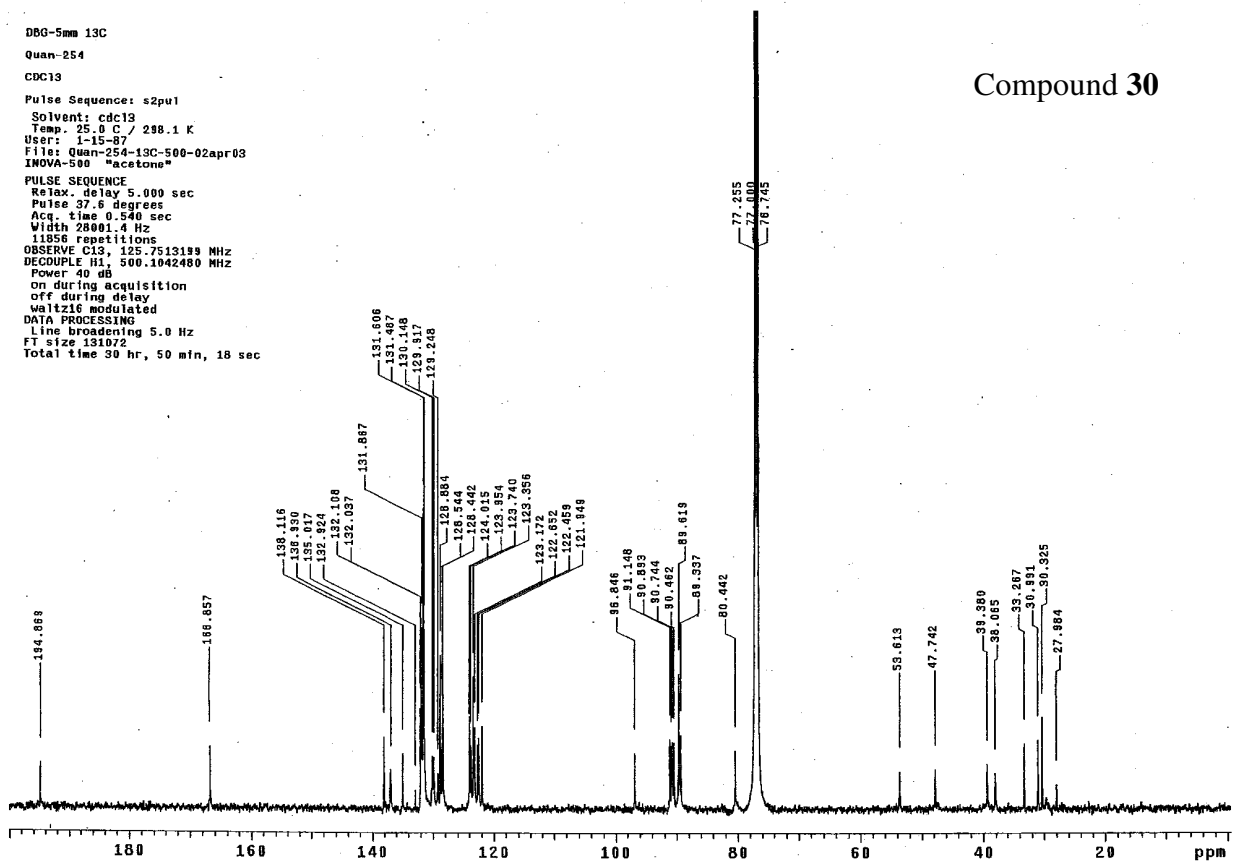

DBG-5mm 13C  
Quan-254  
CDC13  
Pulse Sequence: s2pu1

Compound 30

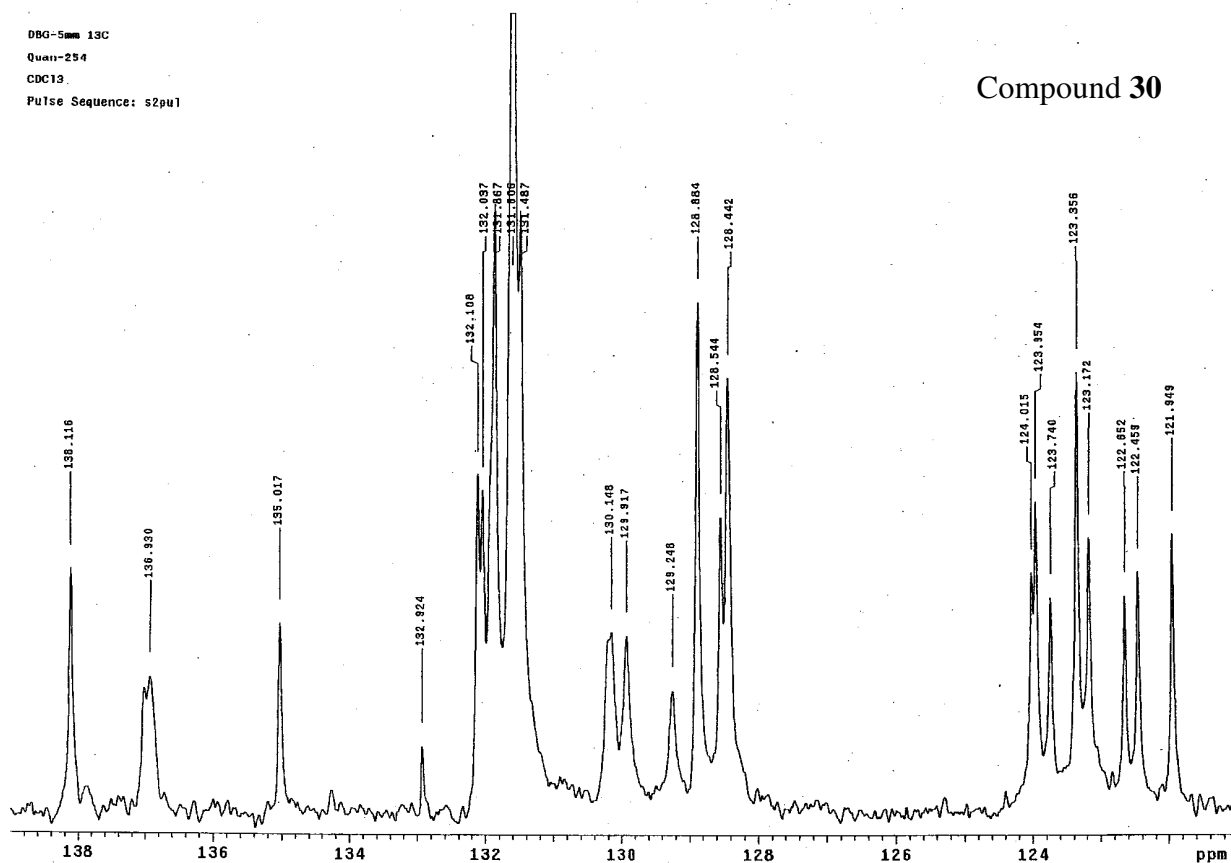

DBG-5mm 13C  
Quan-254  
CDC13  
Pulse Sequence: s2pu1

Compound 30

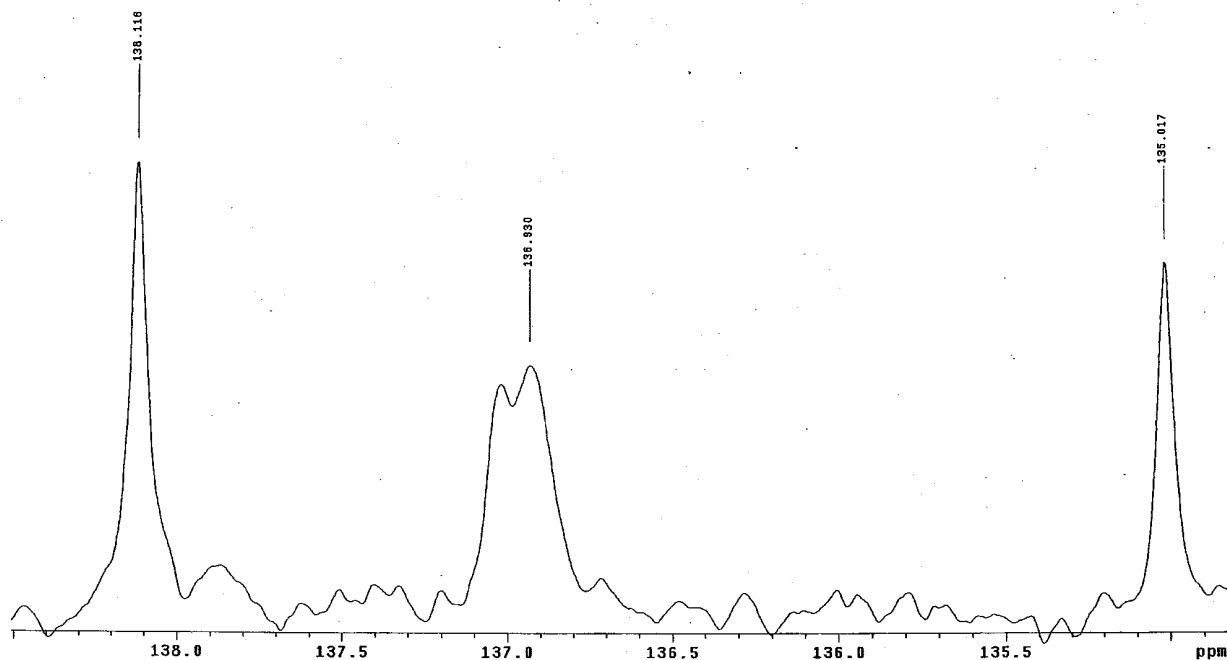

DBG-5mm 13C  
 Quan-254  
 CDC13  
 Pulse Sequence: s2pu1

# Compound 30

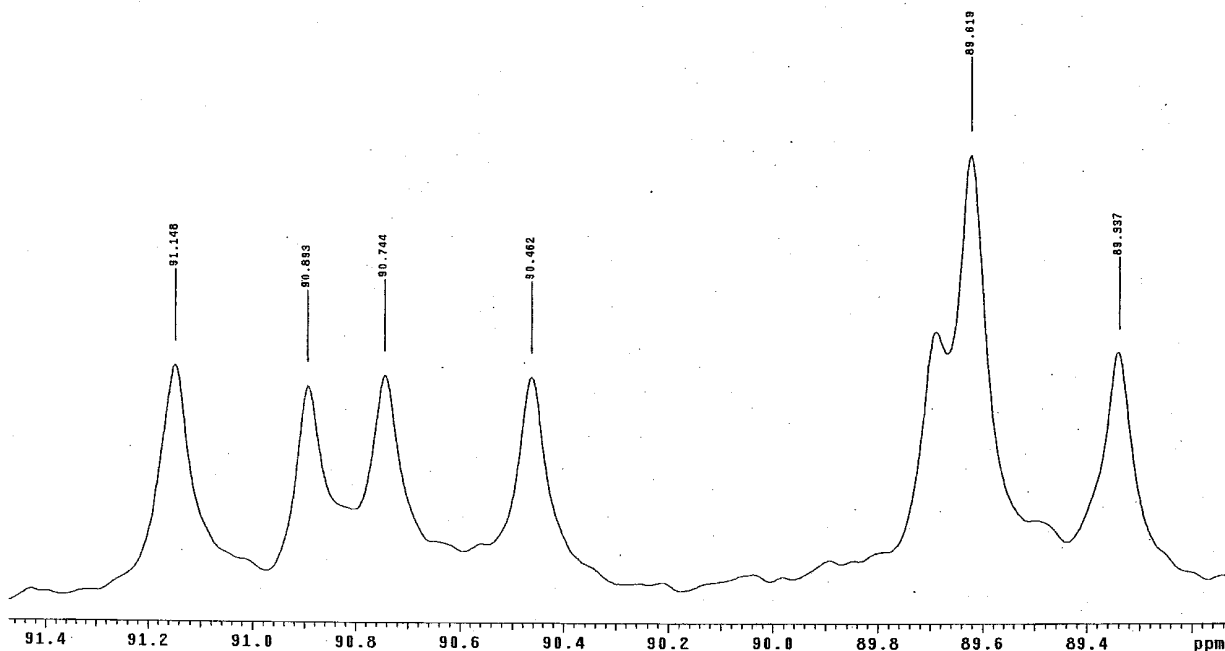

DBG-5mm  
 gCDSY  
 Quan-254  
 CDC13

exp1 gcosy

# Compound 30

| SAMPLE              |               | DEC. & VT     |          |
|---------------------|---------------|---------------|----------|
| date                | Apr 2 2003    | dn            | H1       |
| solvent             | cdcl3         | dof           | 0        |
| file                | /user4/people | dm            | nmn      |
| /quanli/vnmrdata/5- | dm            | c             |          |
| 00/Quan-254-gCOSY-- | dmf           | 200           |          |
| 02Apr03.fid         | homo          | n             |          |
| ACQUISITION         | temp          | 25.0          |          |
| sfrq                | 500.106       |               |          |
| tn                  | H1            | lp            | 4.4      |
| at                  | 0.485         | rp            | 105.3    |
| np                  | 4086          | rpl           | 0        |
| sw                  | 4400.2        | lpl           | 0        |
| fb                  | 2000          |               |          |
| ss                  | 2             | lb            | 0.50     |
| tpwr                | 57            | sb            | 0.075    |
| pw                  | 9.5           | sbs           | not used |
| p1                  | 11.1          | proc          | ft       |
| d1                  | 1.000         | fn            | 8192     |
| tof                 | -406.9        | math          | i        |
| nt                  | 4             |               |          |
| ct                  | 4             | werr          |          |
| alock               | n             | wexp          |          |
| gain                | 40            | wbs           |          |
| FLAGS               |               | wnt           |          |
| fl                  | n             | 2D PROCESSING |          |
| in                  | n             | lb1           | 0.50     |
| dp                  | y             | sb1           | 0.050    |
| hs                  | nn            | sbs1          | not used |
| 2D ACQUISITION      | proc1         | ft            |          |
| sw1                 | 4400.2        | fn1           | 4086     |
| n1                  | 512           | DISPLAY       |          |
| d2                  | 0             | sp            | 812.0    |
| GRADIENTS           |               | wp            | 3423.5   |
| gzlv11              | 3000          | vs            | 2081     |
| gt11                | 0.001900      | sc            | 0        |
| grise               | 0.000100      | wc            | 125      |
| gstab               | 0             | hzmm          | 35.20    |
| qlv1                | 1.0           | is            | 83444.50 |
| 2D DISPLAY          | rfl           |               | 148.6    |
| sp1                 | 787.2         | rffp          | 0        |
| wp1                 | 3452.2        | th            | 3        |
| sc2                 | 0             | ins           | 1.000    |
| wc2                 | 125           | ai            | av       |
| rfl1                | 148.6         |               |          |
| rffp1               | 0             |               |          |

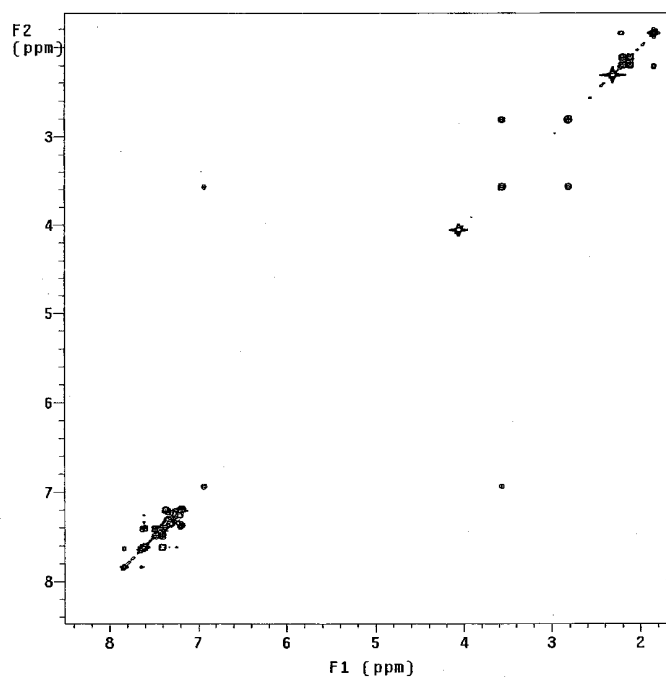

# Compound 30

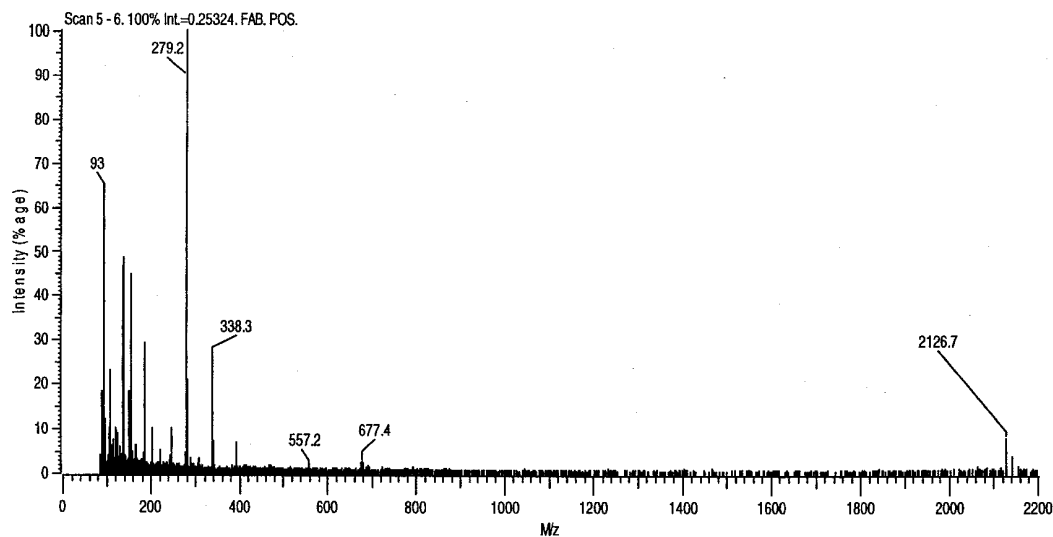

cj-246Aa  
Pulse Sequence: szpu1  
Solvent: CDCl3  
Ambient temperature  
INNOVA-300 "sunofmr.uoregon.edu"  
PULSE SEQUENCE  
Relax. delay 1.000 sec  
Pulse 37.9 degrees  
Acq. time 2.501 sec  
Width 4789.0 Hz  
8 repetitions  
OBSERVE H1, 299.9325259 MHz  
DATA PROCESSING  
Line broadening 0.2 Hz  
FT size 32768  
Total time 0 min, 28 sec

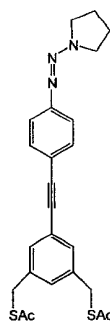

Compound 31

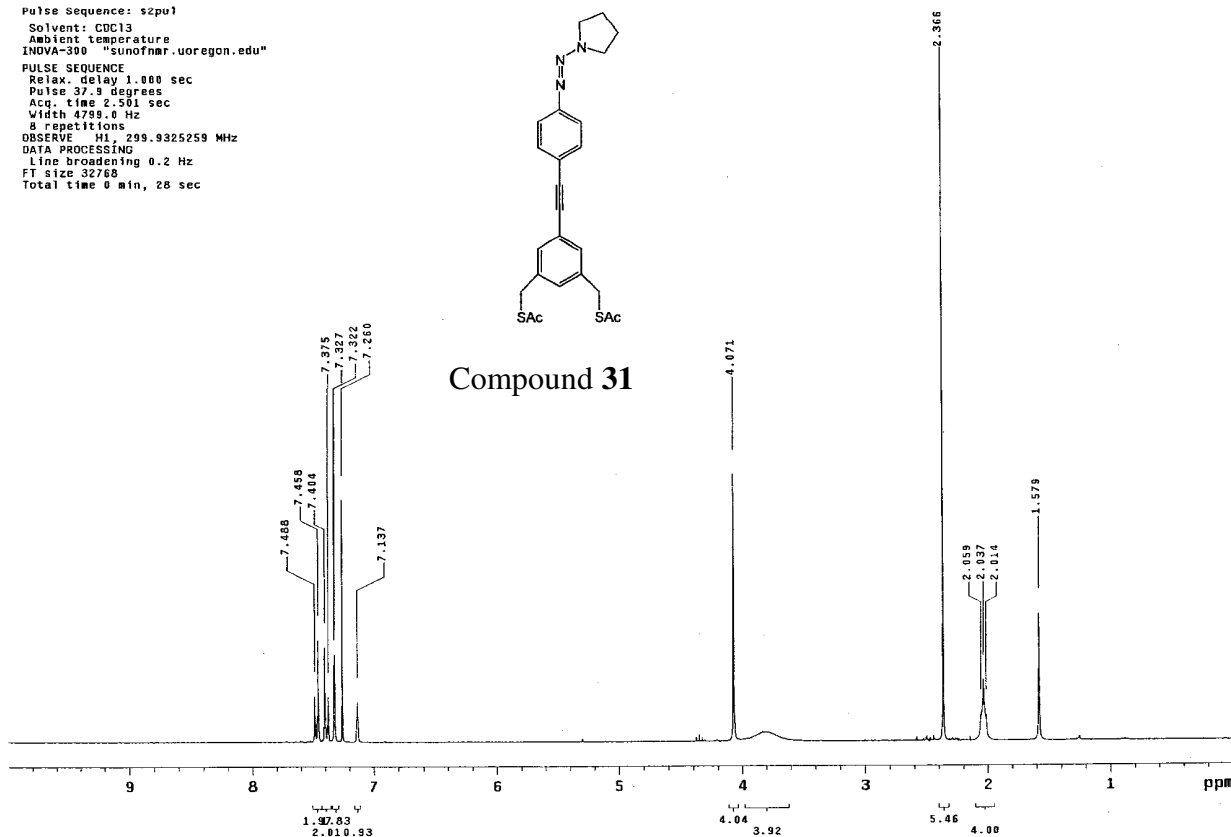

cj-246Aa  
 Pulse Sequence: s2pu1  
 Solvent: CDCl3  
 Ambient temperature  
 INOVA-300 "sunofmr.uoregon.edu"  
 PULSE SEQUENCE  
 Relax. delay 1.000 sec  
 Pulse 37.9 degrees  
 Acq. time 2.501 sec  
 Width 4799.0 Hz  
 8 repetitions  
 OBSERVE H1, 299.9325259 MHz  
 DATA PROCESSING  
 Line broadening 0.2 Hz  
 FT size 32768  
 Total time 0 min, 28 sec

# Compound 31

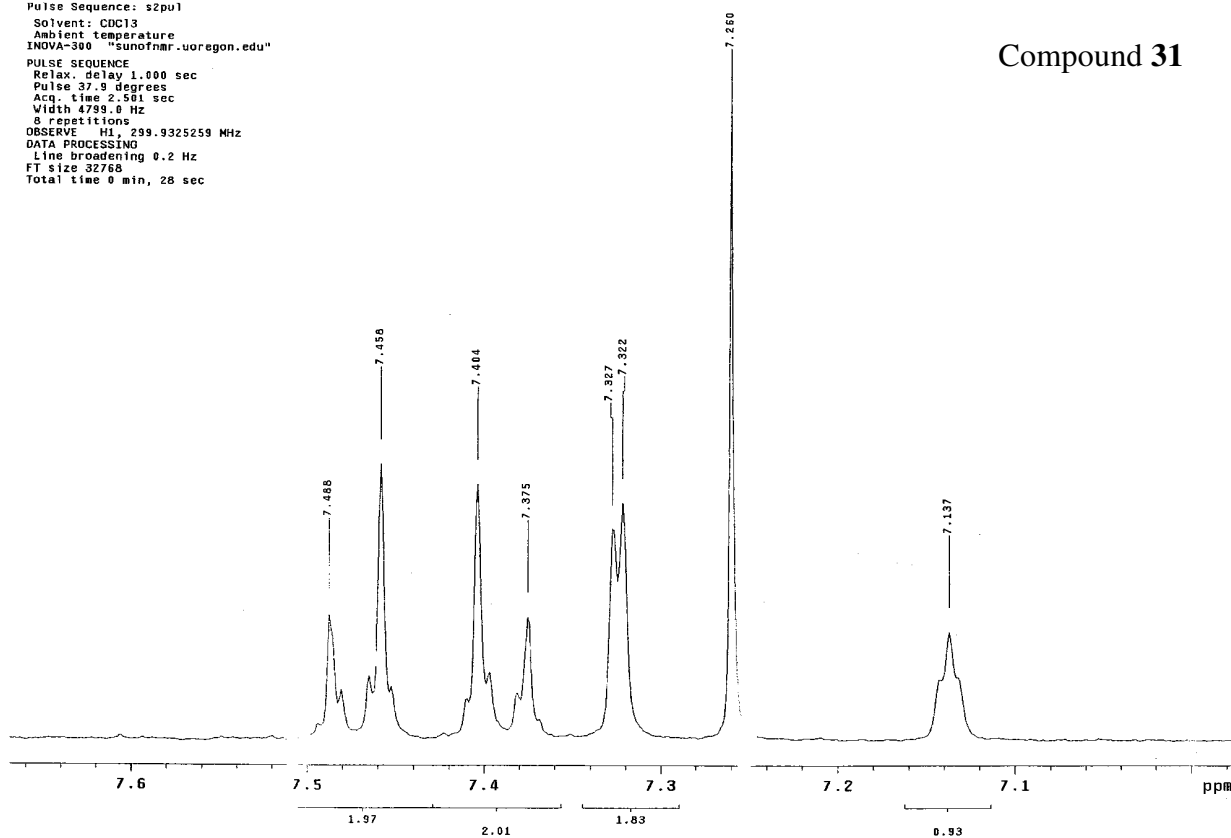

cj-246Ae  
 Pulse Sequence: s2pu1  
 Solvent: CDCl3  
 Ambient temperature  
 INOVA-300 "sunofmr.uoregon.edu"  
 PULSE SEQUENCE  
 Relax. delay 1.000 sec  
 Pulse 47.4 degrees  
 Acq. time 0.539 sec  
 Width 16501.7 Hz  
 288 repetitions  
 OBSERVE C13, 75.4180984 MHz  
 DECOUPLE H1, 299.9335198 MHz  
 Power 32 dB  
 continuously on  
 WALTZ-16 modulated  
 DATA PROCESSING  
 Line broadening 1.0 Hz  
 FT size 32768  
 Total time 24 min, 7 sec

# Compound 31

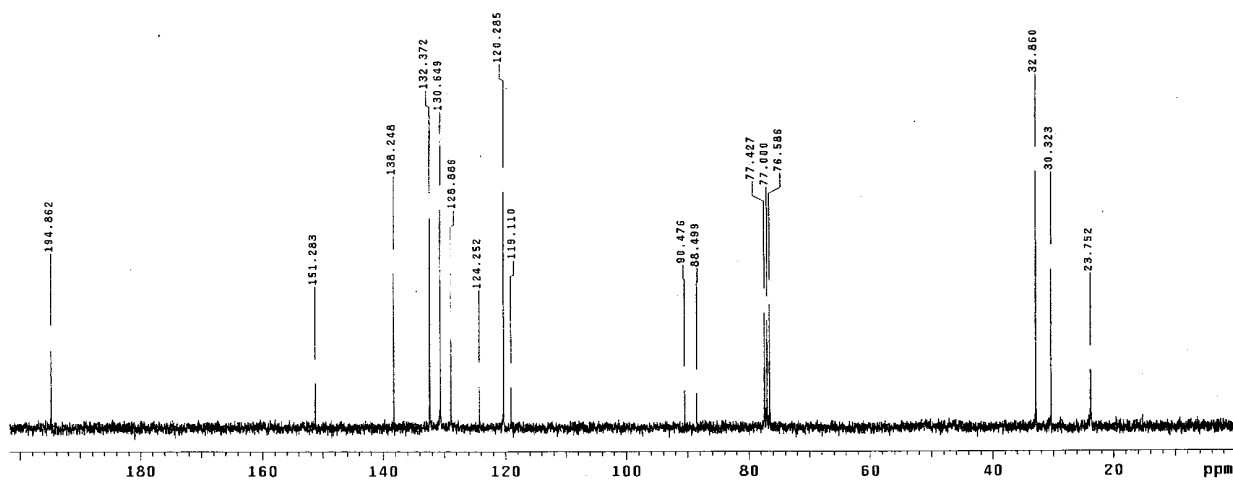



q11-278  
Pulse Sequence: s2pu1

# Compound 32

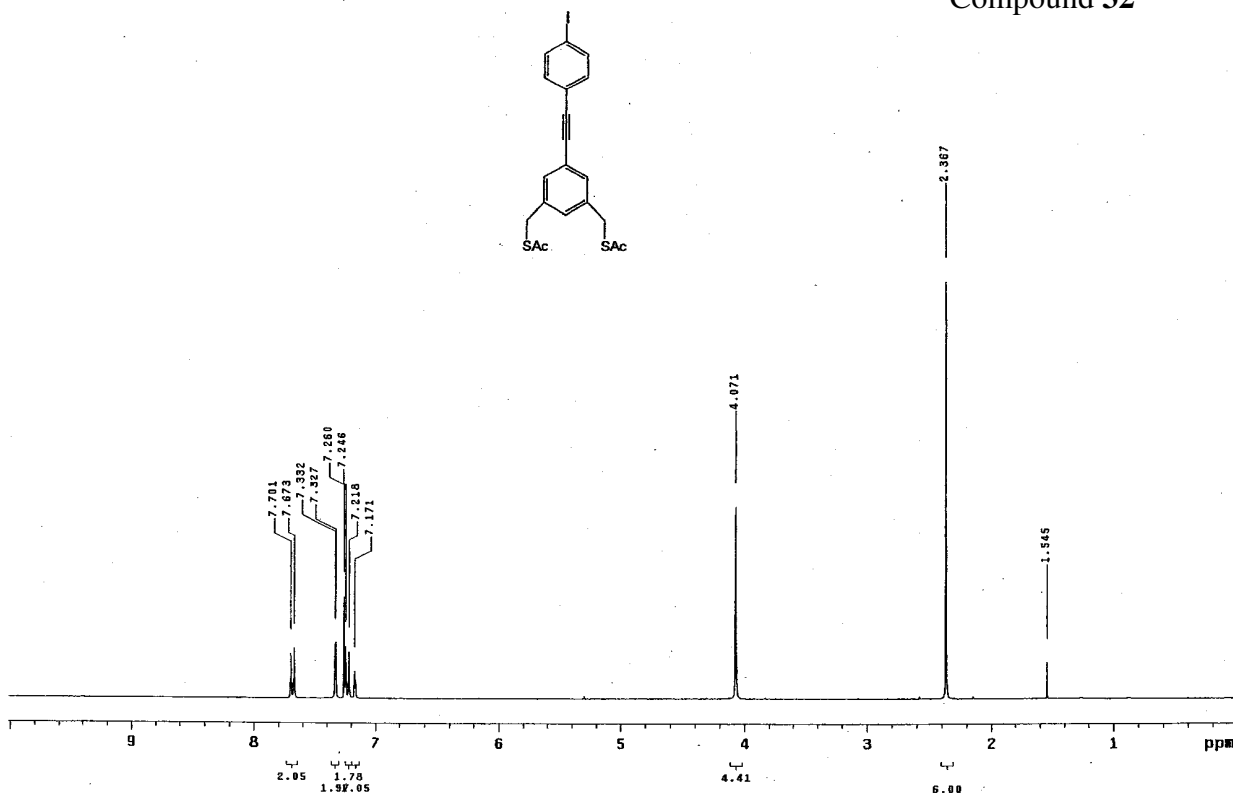

q11-278  
Pulse Sequence: s2pu1

# Compound 32

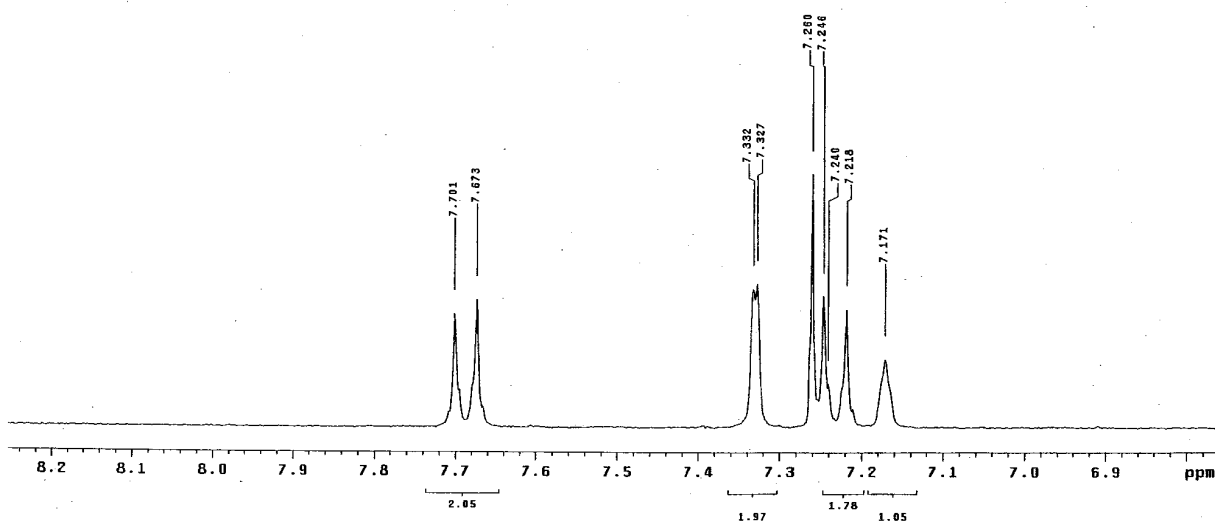

# Compound 32

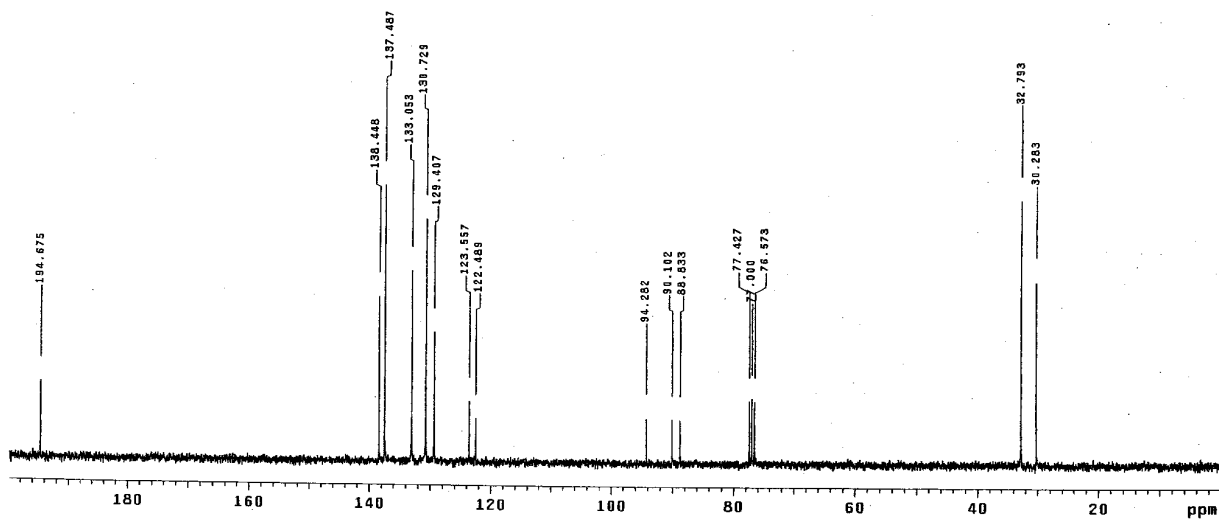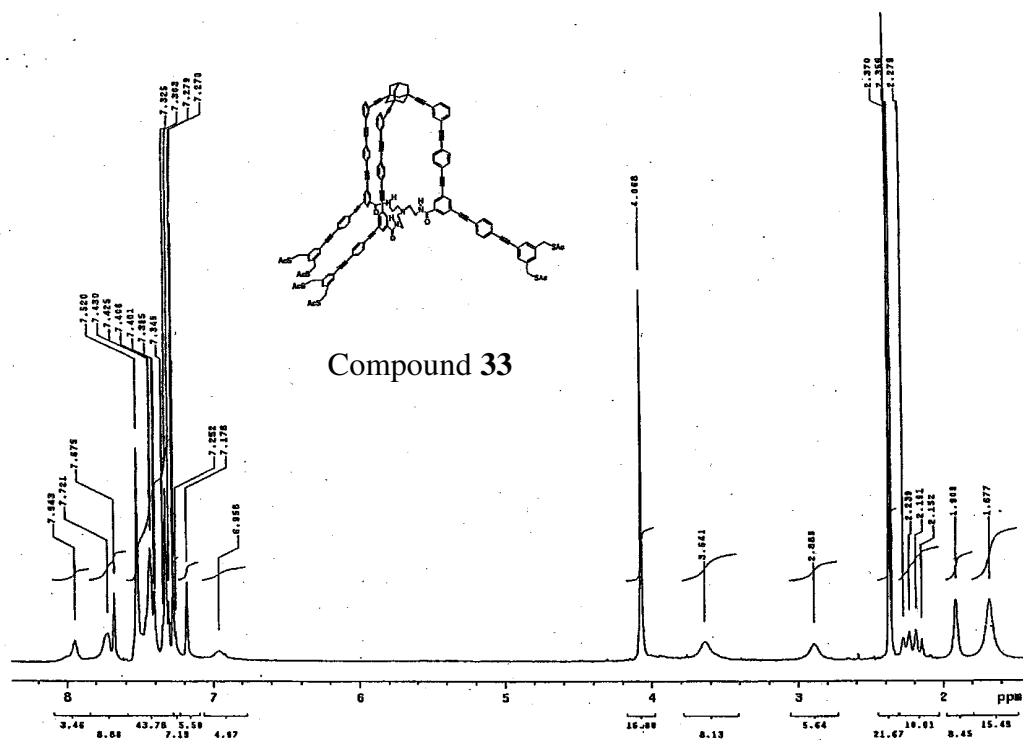

- 
- (1) Malik, A. A.; Archibald, T. G.; Baum, K.; Unroe, M. R. *J. Polymer Sci.: Part A: Polymer Chem.* **1992**, *30*, 1747.
- (2) Godt, A. *J. Org. Chem.* **1997**, *62*, 7471.
- (3) Hsung, R. P.; Chidsey, C. E. D.; Sita, L. R. *Organometallics* **1995**, *14*, 4808.
- (4) Li, Q.; Rukavishnikov, A. V.; Petukhov, P. A.; Zaikova, T. O.; Jin, C.; Keana, J. F. W. *J. Org. Chem.* **2003**, *68*, 4862.
- (5) Gryko, T. T.; Clausen, C.; Roth, K. M.; Dontha, N.; Bocian, D. F.; Kuhr, W. G.; Lindsey, J. S. *J. Org. Chem.* **2000**, *65*, 7345.
- (6) Rukavishnikov, A. V.; Phadke, A.; Lee, M. D.; LaMunyon, D. H.; Petukhov, P. A.; Keana, J. F. W. *Tetrahedron Lett.* **1999**, *40*, 6353.
